# Supplementary material for: Microenvironment characterization and multi-omics signatures related to prognosis and immunotherapy response of hepatocellular carcinoma
Source: Springer Nature journal article supplement (doi:10.1186/s40164-020-00165-3), 2020-05-25
Supplement: MOESM3 [file 18011310]

**Additional Figures:**

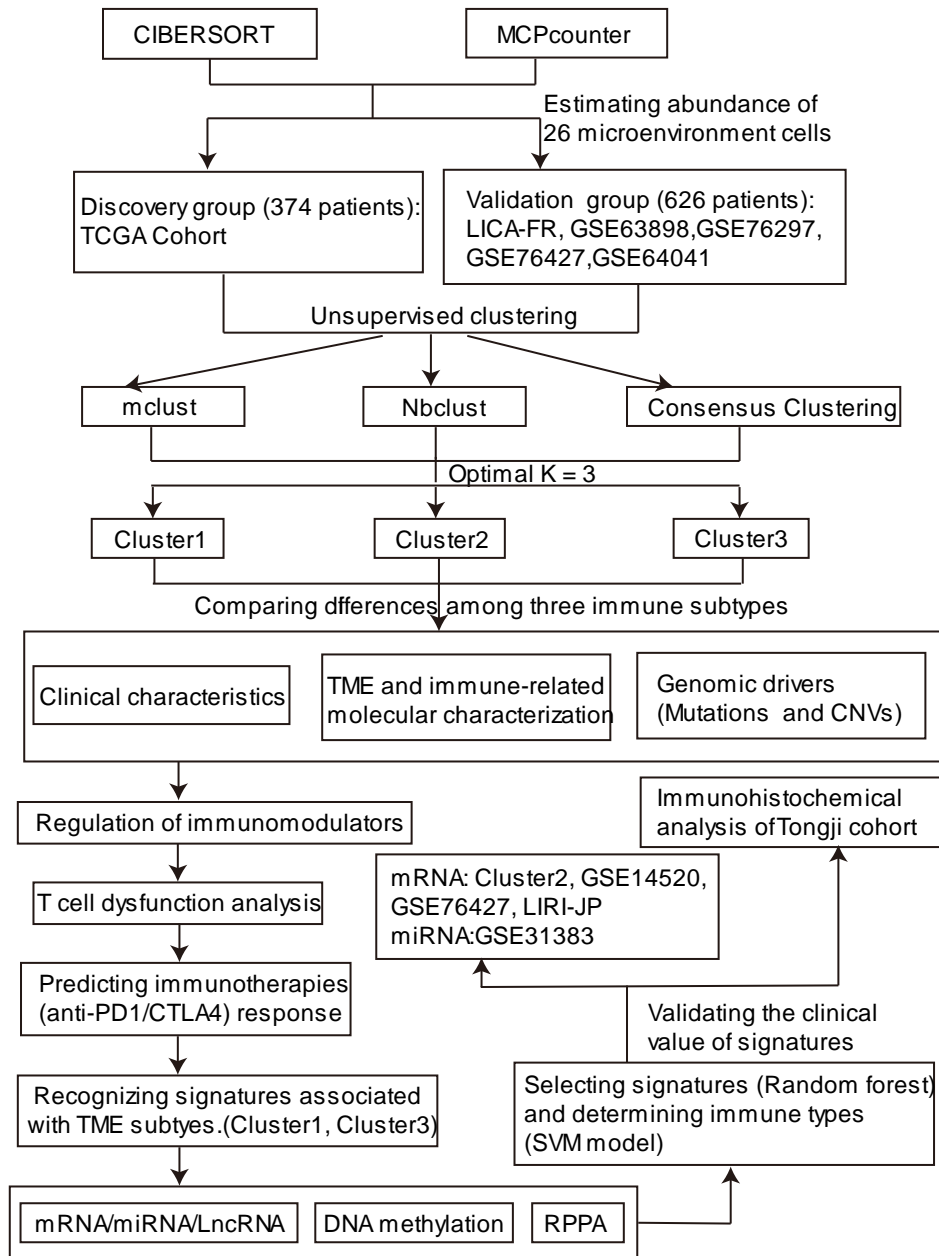

**Fig. S1. The workflow of this study.**

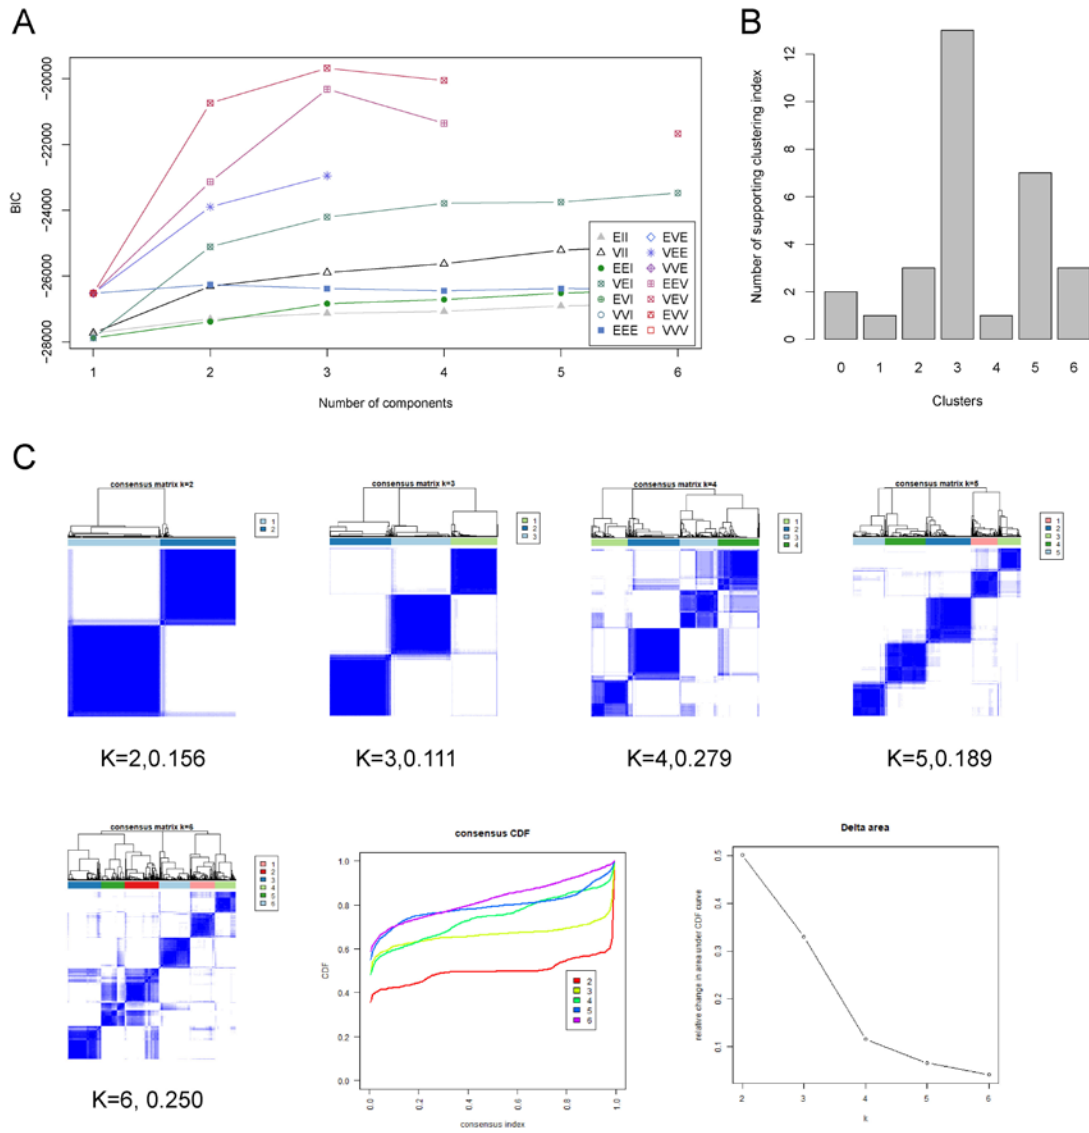

**Fig. S2. Three clustering methods are used to identify the optimal number of clusters in TCGA-LIHC. A mclust. B NbClust. C ConsensusClusterPlus, the number in each consensus matrixes meaned the errors in different K.**

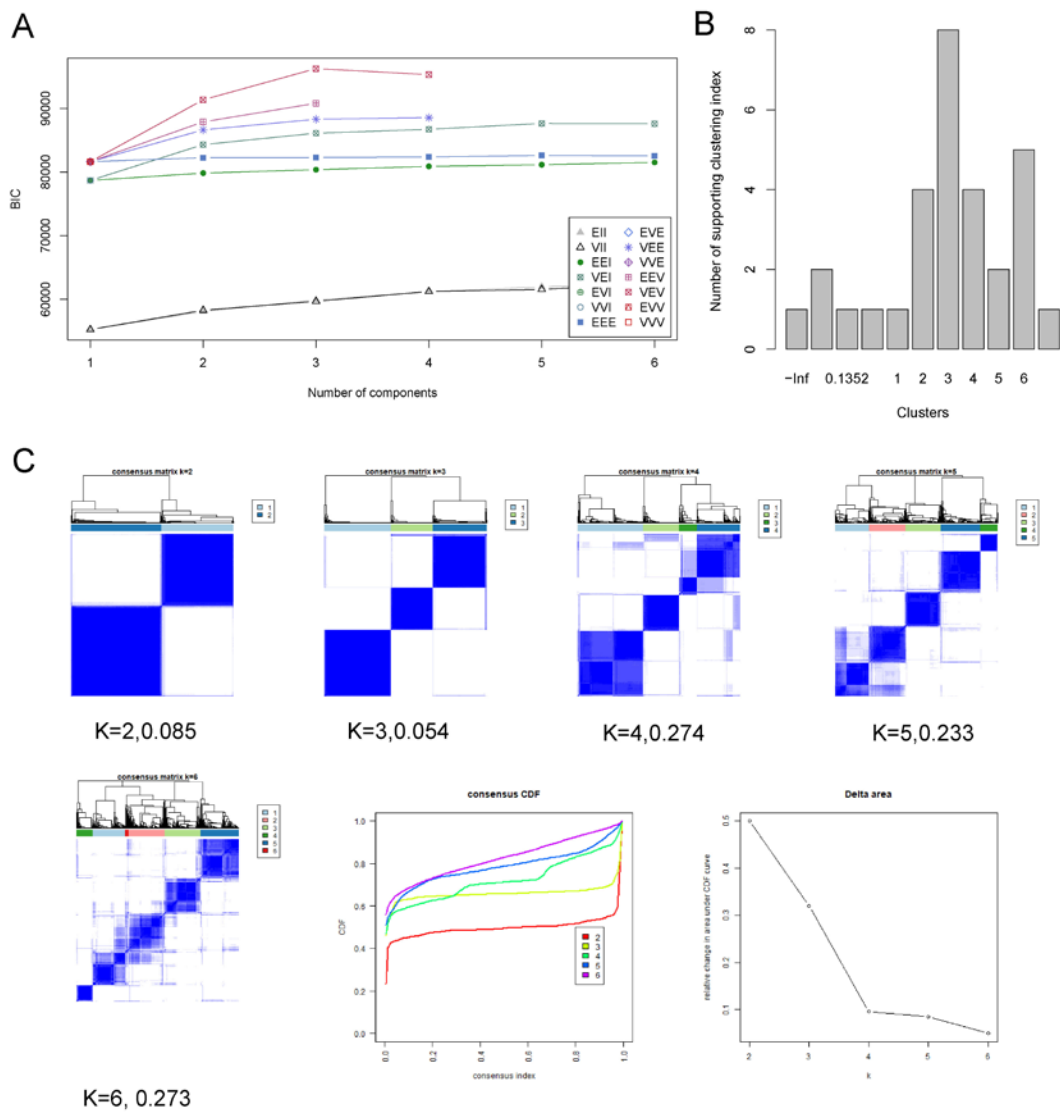

**Fig. S3. Three clustering methods are used to identify the optimal number of clusters in the meta-validation cohort. A** mclust. **B** NbClust. **C** ConsensusClusterPlus, the number in each consensus matrixes meant the errors in different K.

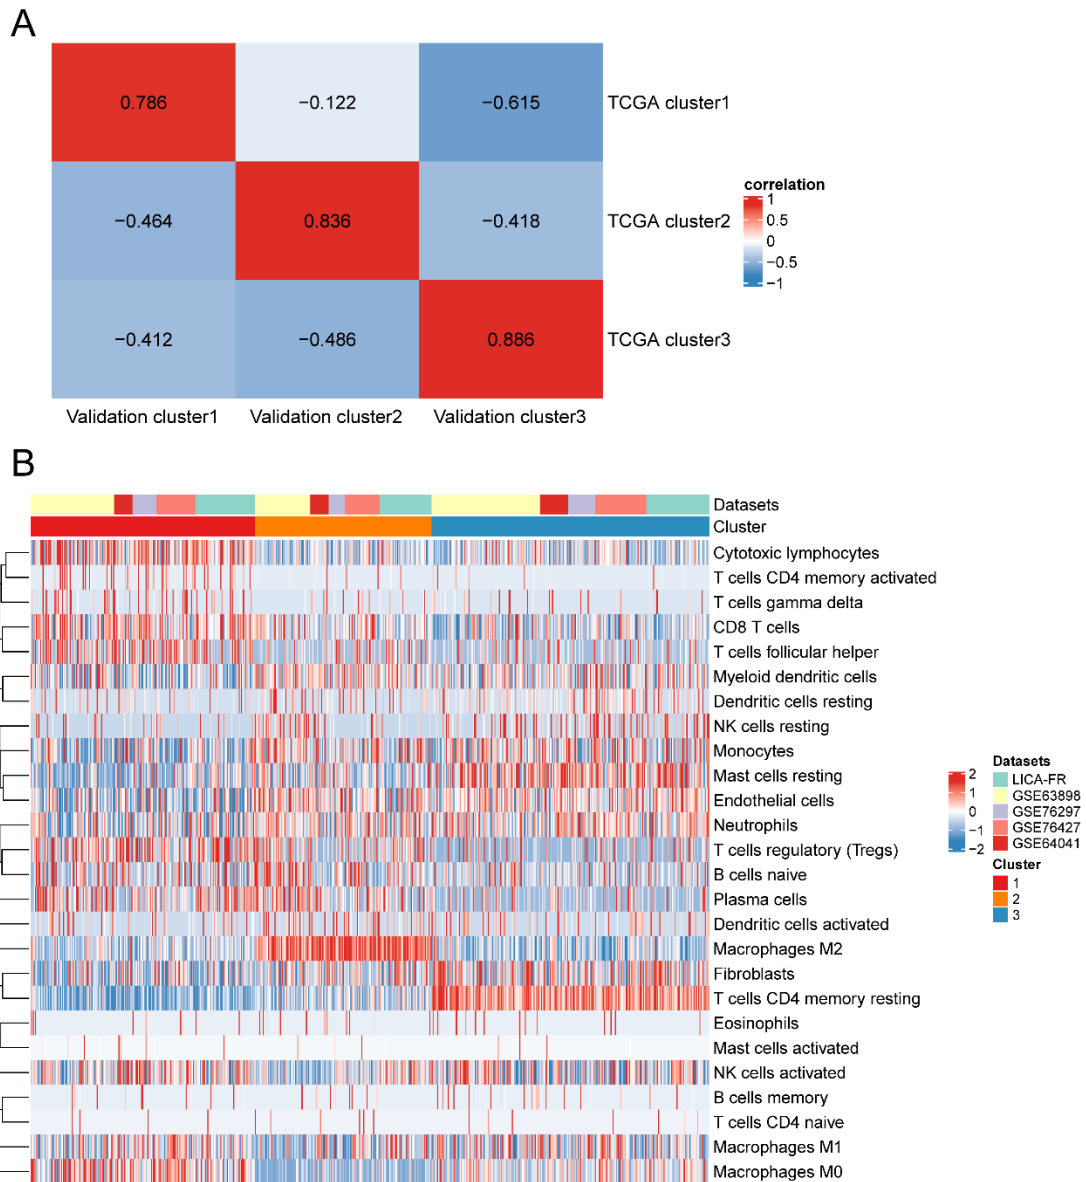

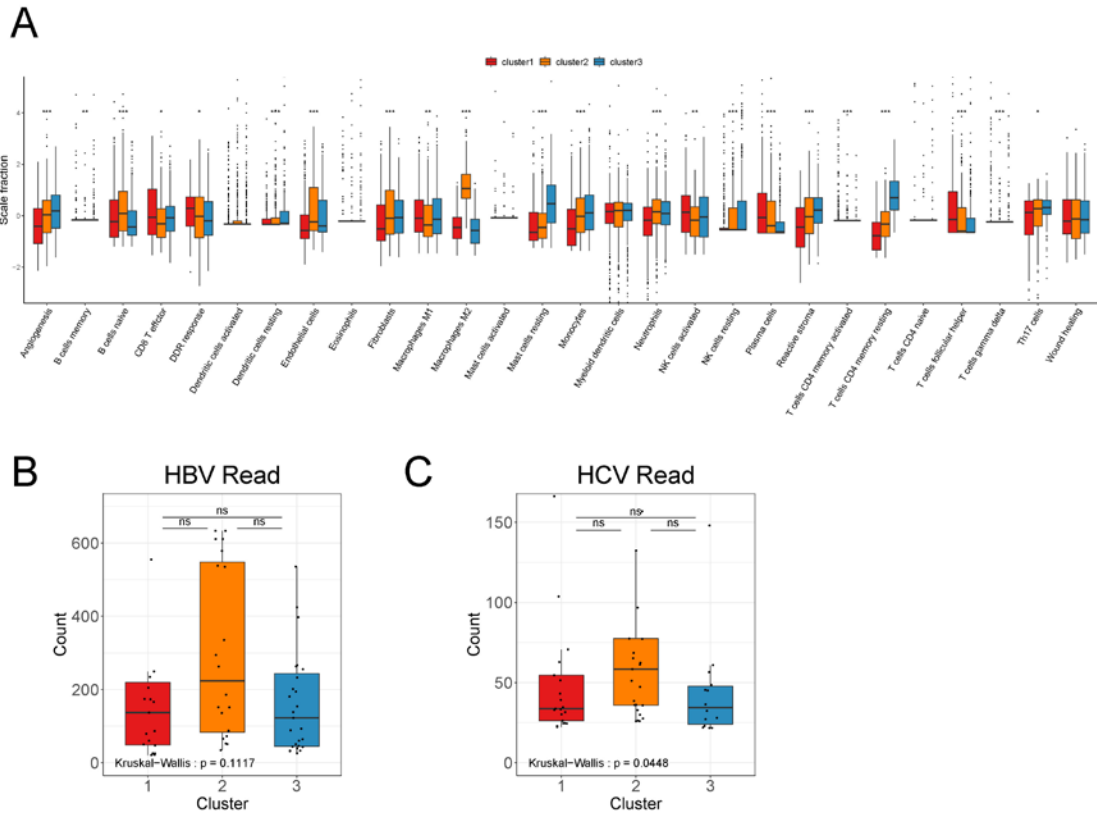

**Fig. S5. Molecular characteristics among three immune subtypes.** Comparison of other immune cells and biological processes (A), HBV and HCV DNA reads (B), (C).

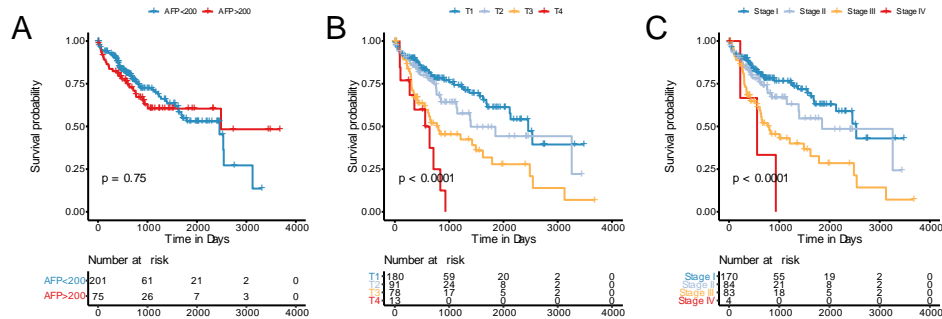

**Fig. S6. Survival analysis of AFP (A), T stage (B) and pathological stage (C).**

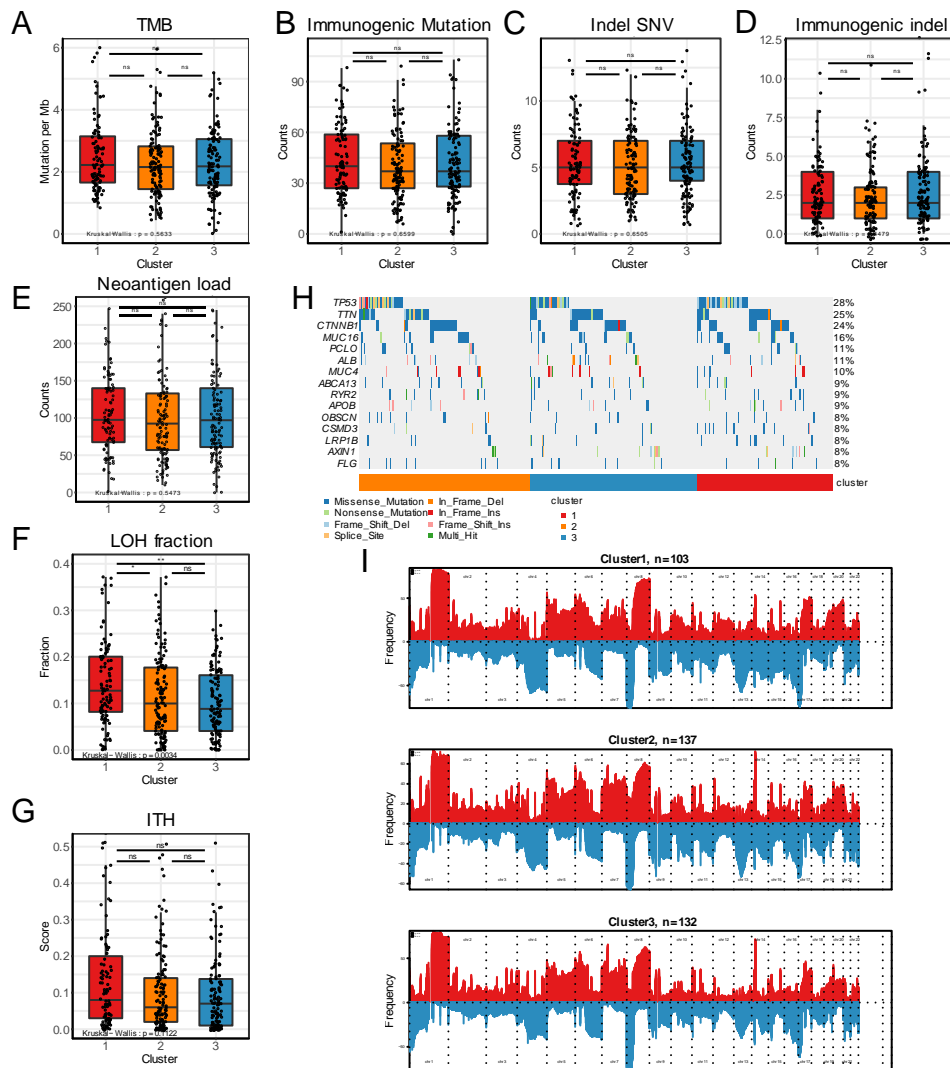

**Fig. S7. The immunogenicity and mutation alterations among three clusters.** Comparison of TMB (A), immunogenic mutations (B), indel SNVs (C), immunogenic indels (D), Neoantigen load (E), LOH fractions (F) and ITH scores (G) among three clusters. H Oncoprint map of 15 most mutated genes. I Frequency of CNV among three clusters. Red: Gain/Amplification; Blue: Loss/Deletion. Heatmap of significant deletion genes in each subtype (Chi-squared test or Fisher's exact test, FDR < 0.1).



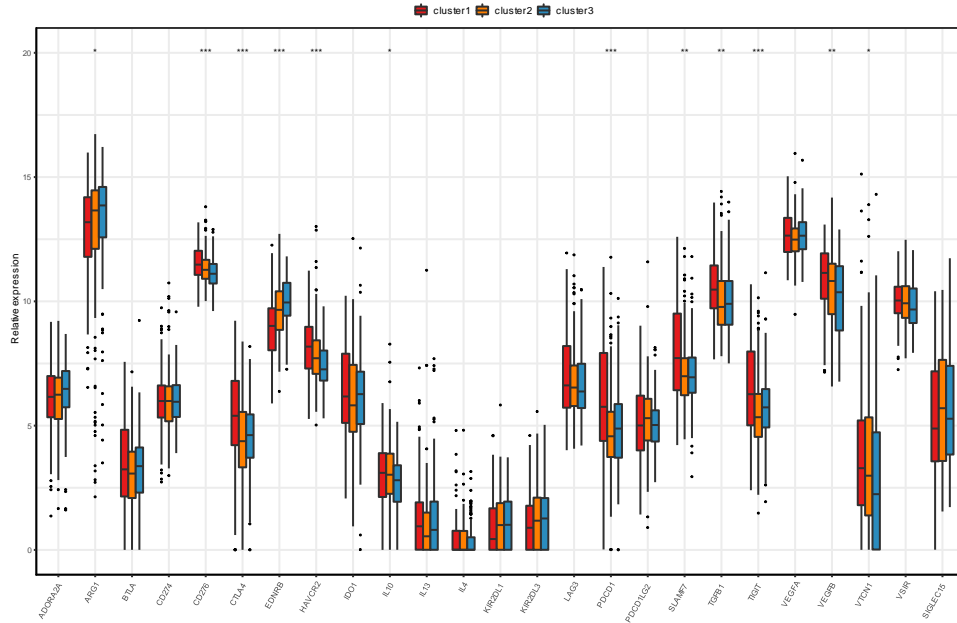

**Fig. S10. The mRNA expression of immunological inhibitors.**

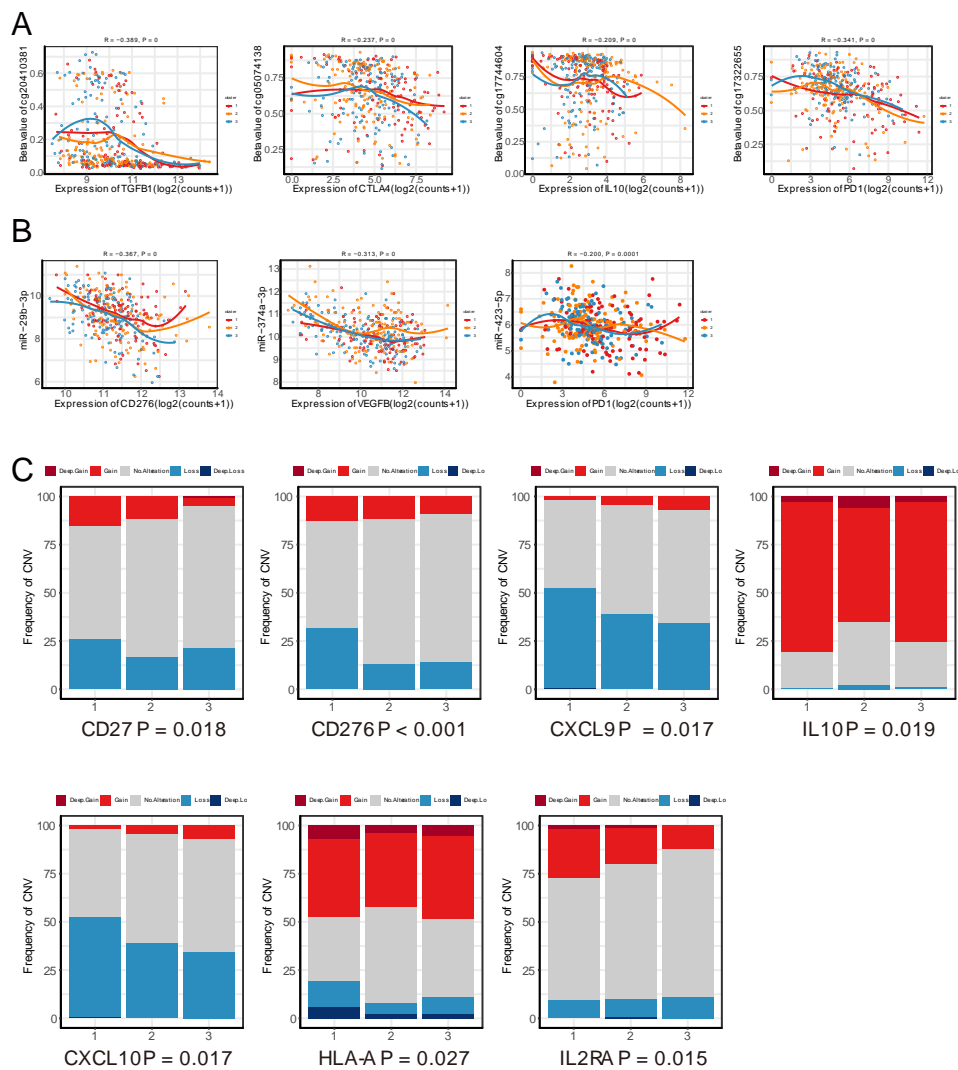

**Fig. S11. Regulation of immunomodulators. A** The negative correlation between



TGFB1, CTLA4, IL10, PD1 and their corresponding CpG methylation sites (Spearman correlation). **B** The negative correlation between CD276, VEGFB, PD1 and their corresponding target miRNAs (Spearman correlation). **C** CNV distribution of CD27, CD276, CXCL9, CXCL10, HLA-A, IL2RA and IL10 among three clusters. Each column represents the total proportion of each subtype and each color indicates different type of CNV (Chi-squared test or Fisher's exact test).

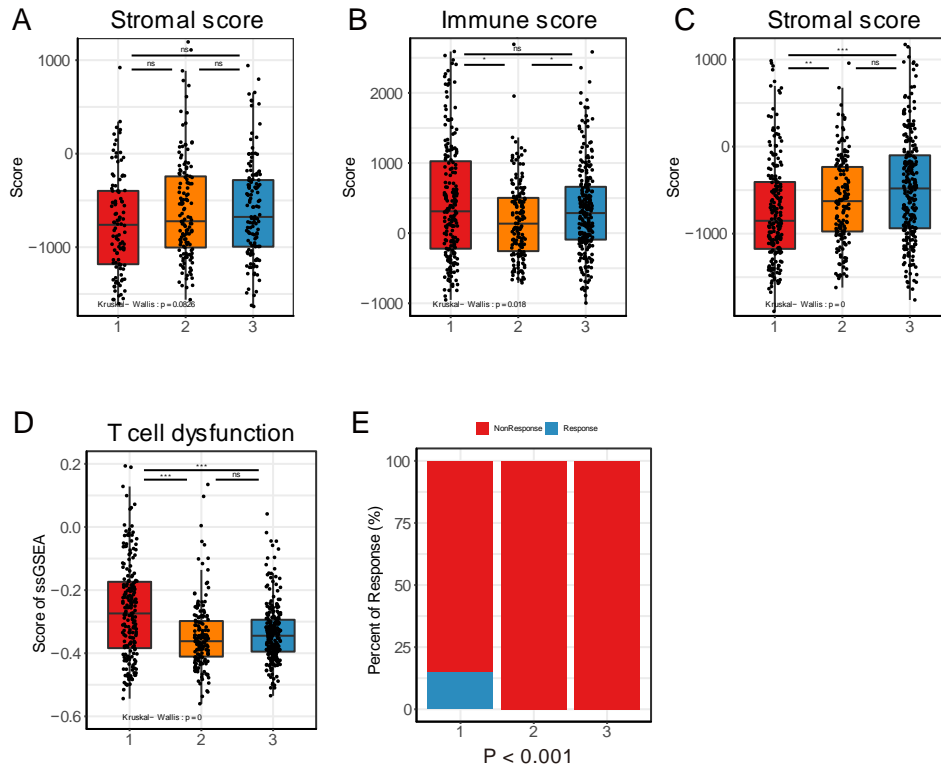

**Fig. S12. Evaluation of immune state and prediction of the response to the immune checkpoint blockade therapy.** **A** Stromal score among three subtypes in TCGA-LIHC. **B-C** Immune score and stromal score among three subtypes in meta-validation cohort. **D** T cell dysfunction in meta-validation cohort. **E** Prediction of immunotherapy responsiveness among three clusters in LICA-FR and GSE64041 by TIDE (Fisher's exact test).

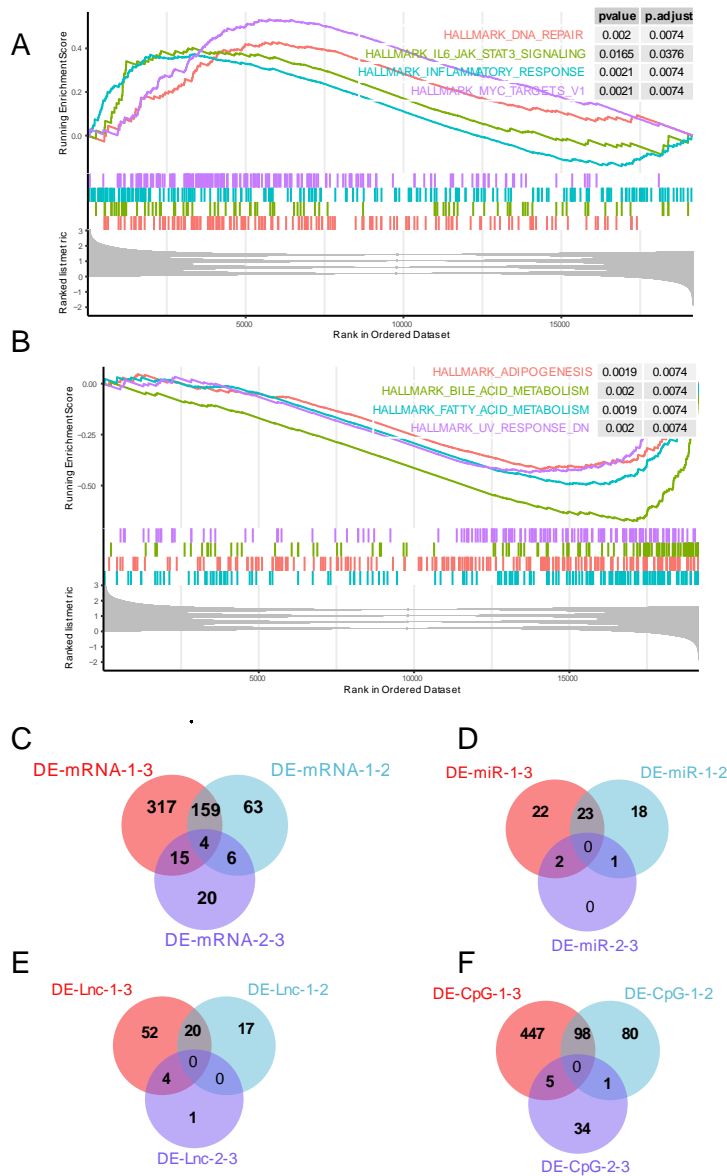

**Fig. S13. Gene Set Enrichment Analysis for the cluster1 and cluster3 and multi-omics differential analysis.** **A** The enriched Hallmark gene sets in cluster1. **B** The enriched Hallmark gene sets in cluster3. **C-F** Schematic diagram of multi-omics differential analysis between any two subtypes. **C** mRNA **D** miRNA **E** LncRNA **F** DNA methylation CpG sites.

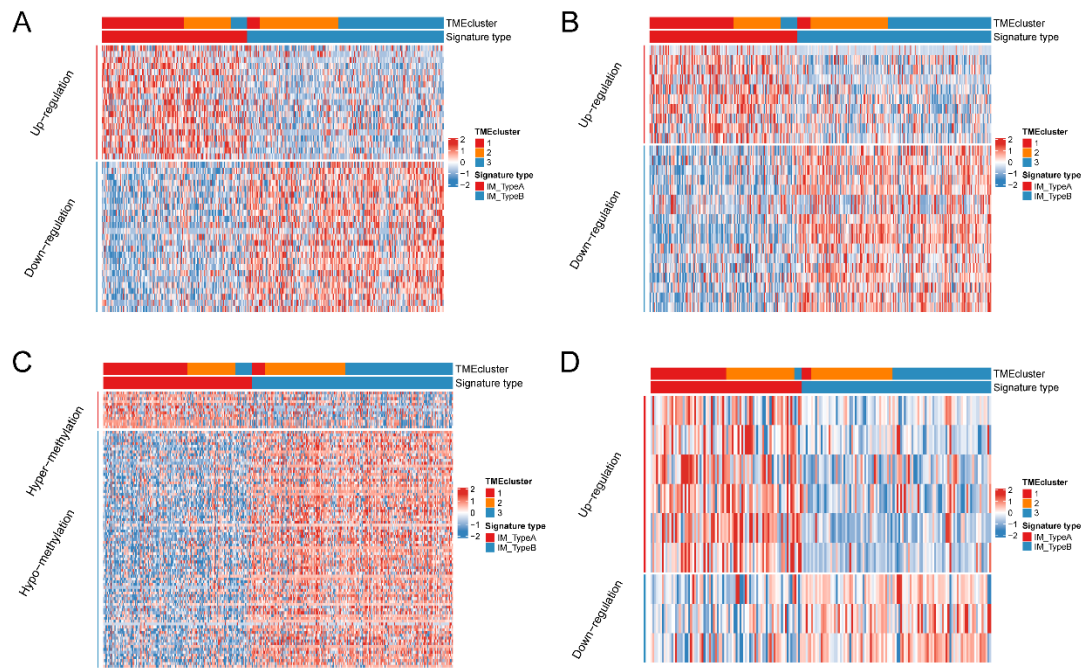

**Fig. S14.** Heatmap for the featured LncRNA (A), miRNA (B), DNA methylation CpG sites (C), proteins (D) (by random forest selecting) distribution in SVM classifier and three clusters.

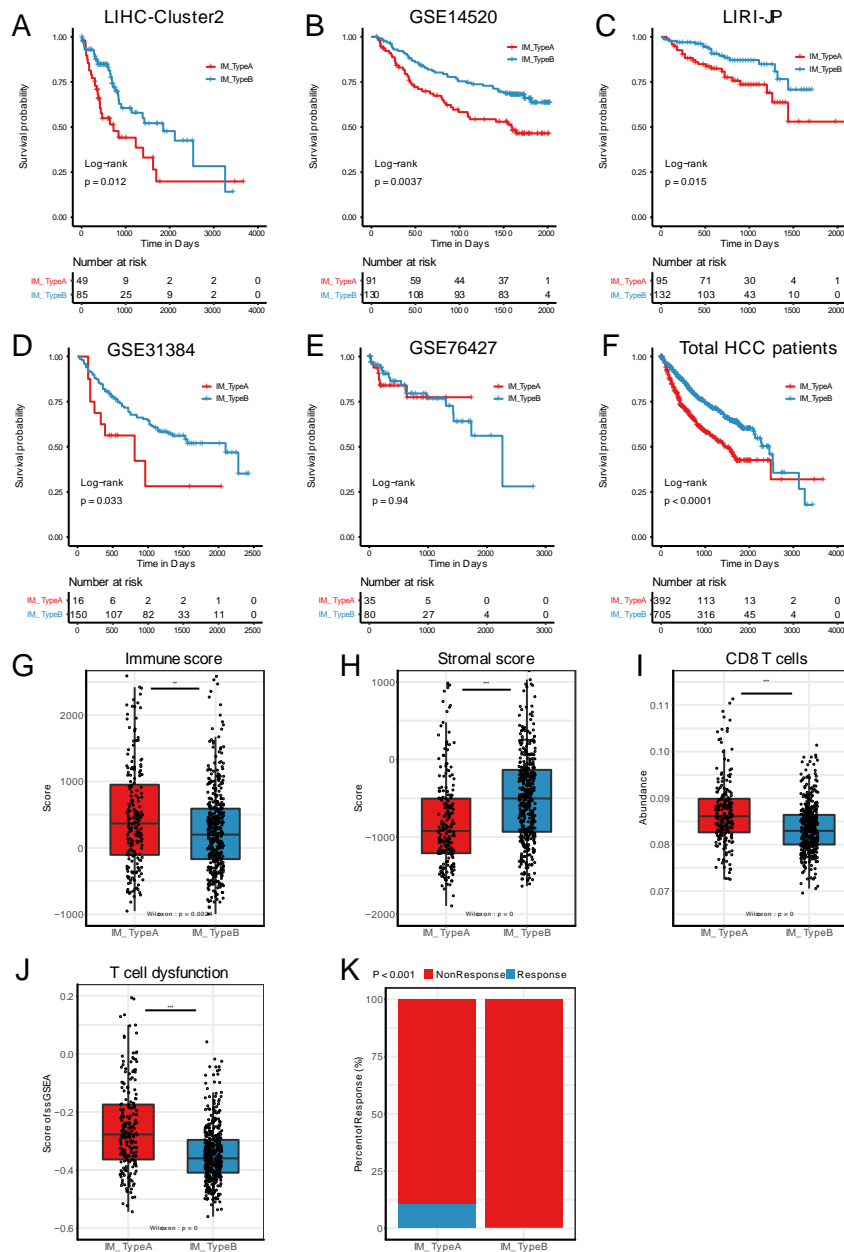

**Fig. S15. Prognostic and immunological characteristics of immune subtypes other datasets divided by SVM classifier.** Kaplan–Meier OS curves grouped by SVM classifier in TCGA cluster2 (**A**), GSE14520 (**B**), LIRI-JP (**C**), GSE31384 (**D**), GSE76427 (**E**), Whole HCC dataset (**F**). Comparison of immune scores(**G**), stromal scores (**H**), CD8 T cells (**I**), T cell dysfunction (**J**) (Wilcoxon signed rank test) and predicted response to immunotherapy (**K**) (Fisher’s exact test) between Type A and Type B based on SVM model in meta-validation cohort.

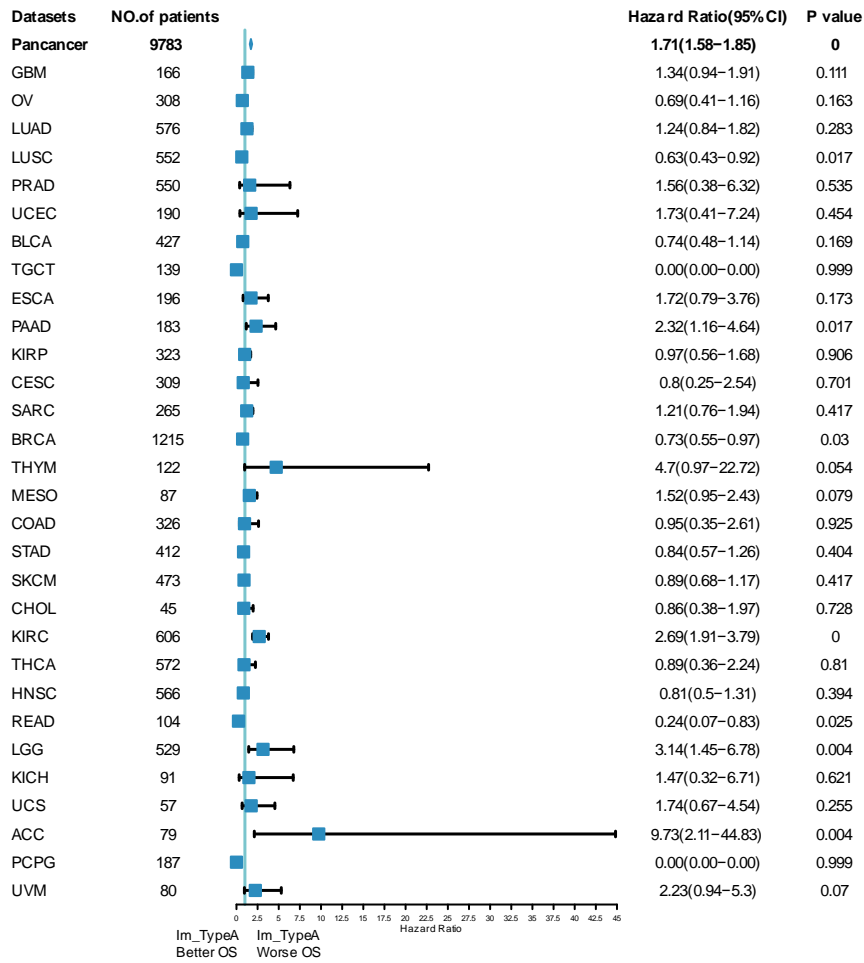

**Fig. S16. Forest diagram for subtype analysis between Type A and Type B in Pan-cancer dataset from TCGA.**

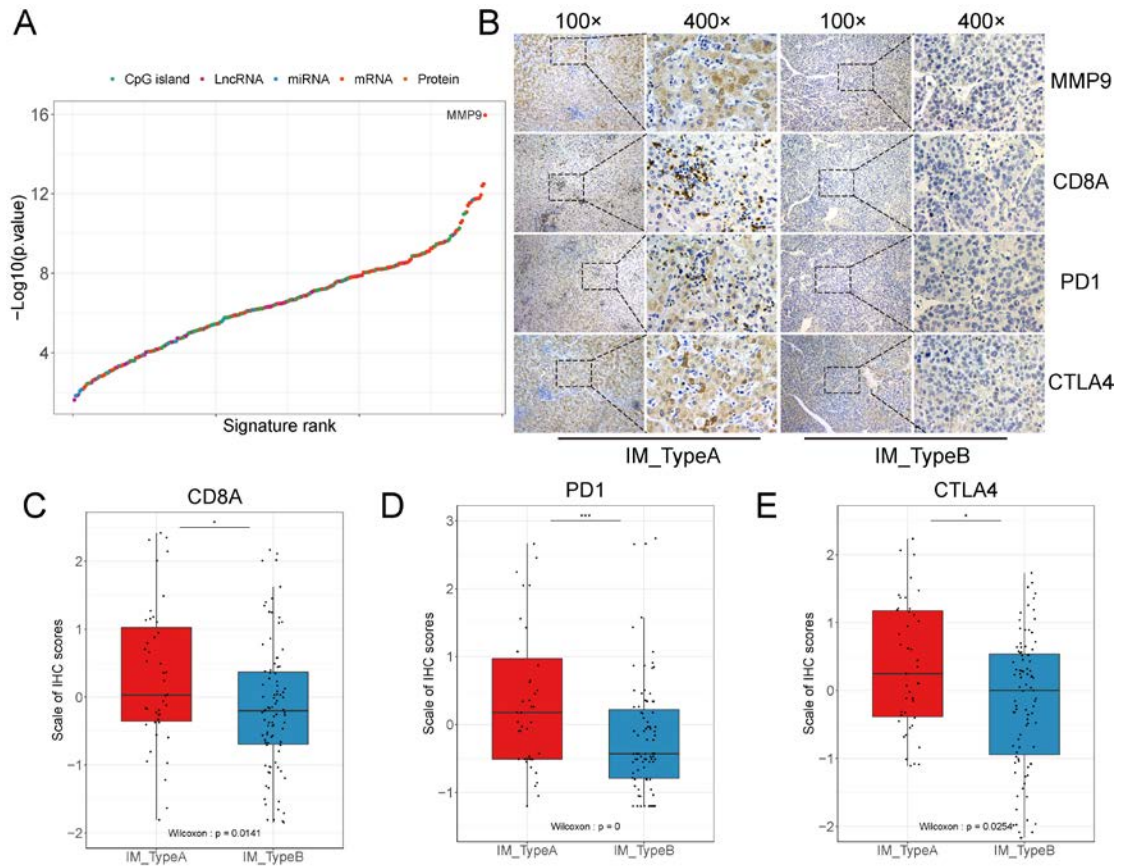

**Fig. S17. MMP9 was a potential indicator of HCC immune characteristics.** **A** All multi-omics signatures were arranged from small to large, with MMP9 mRNA having the smallest P value. **B** Representative immunohistochemical images of Type A and Type B showed different expressions of MMP9, CD8A, PD1 and CTLA4(100× and 400×). Comparison of CD8A (**C**), PD1 (**D**), CTLA4 (**E**) (Wilcoxon signed rank test) between Type A and Type B divided by SVM classifier based on normalized immunohistochemical staining scores of MMP9 in Tongji cohort. ns: no significance, \*:  $P < 0.05$ , \*\*:  $P < 0.01$ , \*\*\*:  $P < 0.001$ .

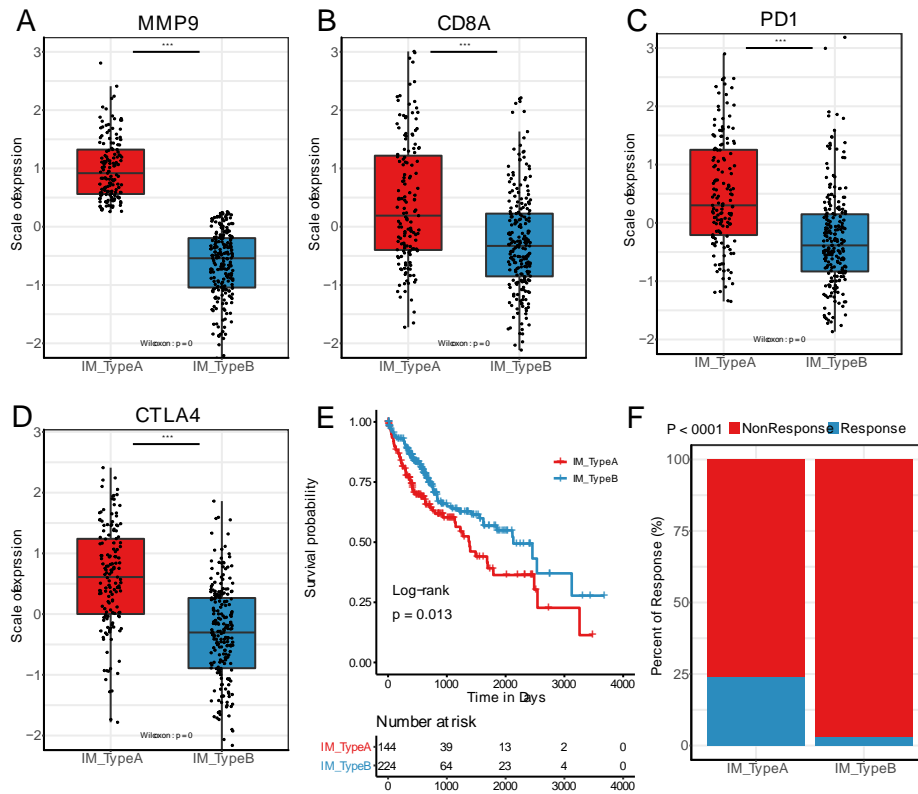

**Fig. S18. MMP9 was a potential indicator of HCC immune characteristics.**

Comparison of MMP9 (A), CD8A (B), PD1 (C), CTLA4 (D) (Wilcoxon signed rank test) between Type A and Type B divided by SVM classifier based on gene expression of MMP9 in TCGA-LIHC cohort. E Survival analysis of Type A and Type B based on the SVM model in TCGA-LIHC cohort. F Predicted response to immunotherapy between Type A and Type B based on MMP9-SVM model. ns: no significance, \*:  $P < 0.05$ , \*\*:  $P < 0.01$ , \*\*\*:  $P < 0.001$ .
