# Supplementary material for: Microenvironment characterization and multi-omics signatures related to prognosis and immunotherapy response of hepatocellular carcinoma
Source: Exp Hematol Oncol. 2020 May 25;9:10. doi: 10.1186/s40164-020-00165-3 (PMC7249423; doi:10.1186/s40164-020-00165-3)
Supplement: Supplementary file 2 — Additional file 2. Additional tables. [file 40164_2020_165_MOESM2_ESM.xlsx]

## Sheet: Table S1
Table S1.Molecuar and pathway gene lists
Molecular characteristic	gene
CD8_T_effector	CD8A
CD8_T_effector	CXCL10
CD8_T_effector	CXCL9
CD8_T_effector	GZMA
CD8_T_effector	GZMB
CD8_T_effector	IFNG
CD8_T_effector	PRF1
CD8_T_effector	TBX21
Th1	APBB2
Th1	APOD
Th1	ATP9A
Th1	BST2
Th1	BTG3
Th1	CCL4
Th1	CD38
Th1	CD70
Th1	CSF2
Th1	CTLA4
Th1	DGKI
Th1	DOK5
Th1	DPP4
Th1	DUSP5
Th1	EGFL6
Th1	GGT1
Th1	HBEGF
Th1	IFNG
Th1	IL12RB2
Th1	IL22
Th1	LRP8
Th1	LRRN3
Th1	LTA
Th1	SGCB
Th1	SYNGR3
Th1	ZBTB32
Th2	ADCY1
Th2	AHI1
Th2	ANK1
Th2	BIRC5
Th2	CDC25C
Th2	CDC7
Th2	CENPF
Th2	CXCR6
Th2	DHFR
Th2	EVI5
Th2	GATA3
Th2	GSTA4
Th2	HELLS
Th2	IL26
Th2	LAIR2
Th2	LIMA1
Th2	MB
Th2	MICAL2
Th2	NEIL3
Th2	PHEX
Th2	PMCH
Th2	PTGIS
Th2	SLC39A14
Th2	SMAD2
Th2	SNRPD1
Th2	WDHD1
Th17	IL17A
Th17	IL17RA
Th17	RORC
IFNγ response	IFNA10
IFNγ response	IFNA14
IFNγ response	IFNA17
IFNγ response	IFNA21
IFNγ response	IFNA5
IFNγ response	IFNA7
IFNγ response	IFNB1
IFNγ response	IFNG
IFNγ response	IFNW1
IFNγ response	IFNAR2
IFNγ response	IFNGR2
Reactive_stroma	ABCC9
Reactive_stroma	ACTA2
Reactive_stroma	ACTN1
Reactive_stroma	ACVR1
Reactive_stroma	ADAM12
Reactive_stroma	ADAMTS2
Reactive_stroma	ADAMTS5
Reactive_stroma	AEBP1
Reactive_stroma	AKAP12
Reactive_stroma	AMPH
Reactive_stroma	ANGPTL2
Reactive_stroma	ANTXR1
Reactive_stroma	APBB2
Reactive_stroma	APLNR
Reactive_stroma	ATP10A
Reactive_stroma	BGN
Reactive_stroma	BMPR1B
Reactive_stroma	BNC2
Reactive_stroma	VSTM4
Reactive_stroma	LDLRAD4
Reactive_stroma	LAMP5
Reactive_stroma	ADTRP
Reactive_stroma	CACNA1C
Reactive_stroma	CALD1
Reactive_stroma	CCL11
Reactive_stroma	CD248
Reactive_stroma	CDH11
Reactive_stroma	CDH20
Reactive_stroma	CDH6
Reactive_stroma	CHN1
Reactive_stroma	CHRD
Reactive_stroma	CLCF1
Reactive_stroma	CLEC11A
Reactive_stroma	COL10A1
Reactive_stroma	COL11A1
Reactive_stroma	COL15A1
Reactive_stroma	COL18A1
Reactive_stroma	COL1A1
Reactive_stroma	COL1A2
Reactive_stroma	COL3A1
Reactive_stroma	COL4A1
Reactive_stroma	COL4A2
Reactive_stroma	COL5A1
Reactive_stroma	COL5A2
Reactive_stroma	COL5A3
Reactive_stroma	COL6A1
Reactive_stroma	COL6A2
Reactive_stroma	COL6A3
Reactive_stroma	COL8A1
Reactive_stroma	COLEC12
Reactive_stroma	CORIN
Reactive_stroma	CRISPLD2
Reactive_stroma	CSGALNACT2
Reactive_stroma	CTSK
Reactive_stroma	CXCL5
Reactive_stroma	CXCL6
Reactive_stroma	DAAM2
Reactive_stroma	DACT1
Reactive_stroma	DCHS1
Reactive_stroma	DCN
Reactive_stroma	DDR2
Reactive_stroma	DENND2A
Reactive_stroma	DIXDC1
Reactive_stroma	DLC1
Reactive_stroma	DOK5
Reactive_stroma	DPT
Reactive_stroma	DYSF
Reactive_stroma	EBF2
Reactive_stroma	ECM2
Reactive_stroma	EDNRA
Reactive_stroma	EFEMP2
Reactive_stroma	EMILIN1
Reactive_stroma	ENOX1
Reactive_stroma	ENPEP
Reactive_stroma	ETS1
Reactive_stroma	F2R
Reactive_stroma	FAP
Reactive_stroma	FAT4
Reactive_stroma	FBLN2
Reactive_stroma	FBLN5
Reactive_stroma	FBN1
Reactive_stroma	FBXL7
Reactive_stroma	FERMT2
Reactive_stroma	FILIP1L
Reactive_stroma	FMOD
Reactive_stroma	FN1
Reactive_stroma	FSTL1
Reactive_stroma	FSTL3
Reactive_stroma	GGT5
Reactive_stroma	GLT8D2
Reactive_stroma	ADGRA2
Reactive_stroma	GPR4
Reactive_stroma	GREM1
Reactive_stroma	GUCY1A2
Reactive_stroma	HEPH
Reactive_stroma	HEYL
Reactive_stroma	HIC1
Reactive_stroma	HSPA5
Reactive_stroma	IL11
Reactive_stroma	IL13RA1
Reactive_stroma	IL1R1
Reactive_stroma	IL1RL1
Reactive_stroma	IL6
Reactive_stroma	IL7R
Reactive_stroma	INHBA
Reactive_stroma	INHBB
Reactive_stroma	INHBE
Reactive_stroma	ISLR
Reactive_stroma	ITGA1
Reactive_stroma	ITGA5
Reactive_stroma	ITGB1
Reactive_stroma	ITGB3
Reactive_stroma	JAM3
Reactive_stroma	KCND2
Reactive_stroma	KCNE4
Reactive_stroma	JCAD
Reactive_stroma	SHISAL1
Reactive_stroma	LAMA2
Reactive_stroma	LAMA4
Reactive_stroma	LHFPL6
Reactive_stroma	LIF
Reactive_stroma	LPAR4
Reactive_stroma	PLPPR4
Reactive_stroma	LRRC15
Reactive_stroma	LRRC17
Reactive_stroma	LRRC32
Reactive_stroma	LSAMP
Reactive_stroma	LUM
Reactive_stroma	MAGEL2
Reactive_stroma	MAN1A1
Reactive_stroma	MICAL2
Reactive_stroma	MMP1
Reactive_stroma	MMP14
Reactive_stroma	MMP2
Reactive_stroma	MMP9
Reactive_stroma	MMRN2
Reactive_stroma	MXRA8
Reactive_stroma	NAP1L3
Reactive_stroma	NID2
Reactive_stroma	NOX4
Reactive_stroma	NRP1
Reactive_stroma	NT5E
Reactive_stroma	TENM3
Reactive_stroma	OLFML1
Reactive_stroma	OLFML2B
Reactive_stroma	OLFML3
Reactive_stroma	OMD
Reactive_stroma	PCOLCE
Reactive_stroma	PDGFA
Reactive_stroma	PDGFB
Reactive_stroma	PDGFC
Reactive_stroma	PDGFRA
Reactive_stroma	PDGFRB
Reactive_stroma	PDGFRL
Reactive_stroma	PDZRN3
Reactive_stroma	PLVAP
Reactive_stroma	PLXDC1
Reactive_stroma	PLXNC1
Reactive_stroma	PMP22
Reactive_stroma	POSTN
Reactive_stroma	PRKG1
Reactive_stroma	PRRX1
Reactive_stroma	PTGDR
Reactive_stroma	PTGFR
Reactive_stroma	PTGIR
Reactive_stroma	PTH1R
Reactive_stroma	PTPRM
Reactive_stroma	RCN3
Reactive_stroma	RECK
Reactive_stroma	RFTN1
Reactive_stroma	ROBO4
Reactive_stroma	ROR1
Reactive_stroma	RUNX1T1
Reactive_stroma	SAMD14
Reactive_stroma	SDC2
Reactive_stroma	SEC24D
Reactive_stroma	SERPINE1
Reactive_stroma	SERPINF1
Reactive_stroma	SGCD
Reactive_stroma	SH2B3
Reactive_stroma	SLIT3
Reactive_stroma	SPARC
Reactive_stroma	SPON1
Reactive_stroma	ST3GAL2
Reactive_stroma	STARD13
Reactive_stroma	SULF1
Reactive_stroma	TGFB2
Reactive_stroma	TGFB3
Reactive_stroma	TGFBI
Reactive_stroma	TGFBR1
Reactive_stroma	TGFBR2
Reactive_stroma	THBS1
Reactive_stroma	THBS2
Reactive_stroma	THY1
Reactive_stroma	TIMP2
Reactive_stroma	TIMP3
Reactive_stroma	TMEM204
Reactive_stroma	SYNDIG1
Reactive_stroma	TNFAIP6
Reactive_stroma	TNFRSF10D
Reactive_stroma	TNFSF11
Reactive_stroma	TNN
Reactive_stroma	TNS3
Reactive_stroma	TREM1
Reactive_stroma	TRPC4AP
Reactive_stroma	UNC5C
Reactive_stroma	VCAN
Reactive_stroma	VEGFC
Reactive_stroma	VGLL3
Reactive_stroma	VIM
Reactive_stroma	WNT2
Reactive_stroma	ZCCHC24
Reactive_stroma	ZFPM2
Reactive_stroma	ZNF423
Angiogenesis	A2M
Angiogenesis	ABCA6
Angiogenesis	ABCA8
Angiogenesis	ABI3BP
Angiogenesis	ACSS3
Angiogenesis	ACVR2A
Angiogenesis	ACVRL1
Angiogenesis	ADAMTS9
Angiogenesis	ADAMTSL2
Angiogenesis	ADCYAP1
Angiogenesis	ADPRH
Angiogenesis	ADRA2A
Angiogenesis	AFF3
Angiogenesis	AGTR1
Angiogenesis	ALDH1A1
Angiogenesis	AMHR2
Angiogenesis	AMPD1
Angiogenesis	ANK2
Angiogenesis	ANXA6
Angiogenesis	AOC3
Angiogenesis	AP1S2
Angiogenesis	AQP1
Angiogenesis	ARHGAP6
Angiogenesis	ARHGEF15
Angiogenesis	ARRB1
Angiogenesis	ARSB
Angiogenesis	AZGP1
Angiogenesis	BEND5
Angiogenesis	BHLHE41
Angiogenesis	BST1
Angiogenesis	NDNF
Angiogenesis	CCDC170
Angiogenesis	C7
Angiogenesis	CPED1
Angiogenesis	CACNA2D2
Angiogenesis	CCDC102B
Angiogenesis	CCL21
Angiogenesis	CD200
Angiogenesis	CD34
Angiogenesis	CD36
Angiogenesis	CD93
Angiogenesis	CDH5
Angiogenesis	CETP
Angiogenesis	CHRDL1
Angiogenesis	CILP
Angiogenesis	CLIC5
Angiogenesis	CLIP3
Angiogenesis	COL14A1
Angiogenesis	CPA3
Angiogenesis	CTF1
Angiogenesis	CTSE
Angiogenesis	CTSG
Angiogenesis	CXCL12
Angiogenesis	CXCL2
Angiogenesis	CXorf36
Angiogenesis	CYP1B1
Angiogenesis	CYP27A1
Angiogenesis	CYSLTR2
Angiogenesis	ACKR1
Angiogenesis	DKK2
Angiogenesis	DMXL2
Angiogenesis	DPEP1
Angiogenesis	E2F5
Angiogenesis	EDA
Angiogenesis	EDNRB
Angiogenesis	EMCN
Angiogenesis	ENG
Angiogenesis	ENPP2
Angiogenesis	ENPP4
Angiogenesis	EPCAM
Angiogenesis	EPOR
Angiogenesis	EPS8
Angiogenesis	F13A1
Angiogenesis	FABP3
Angiogenesis	FAM107A
Angiogenesis	FAM13C
Angiogenesis	PIEZO2
Angiogenesis	FGF7
Angiogenesis	FHL5
Angiogenesis	FRZB
Angiogenesis	FYN
Angiogenesis	FZD4
Angiogenesis	GAS7
Angiogenesis	GFRA3
Angiogenesis	GJA4
Angiogenesis	GJA5
Angiogenesis	COLGALT2
Angiogenesis	GMPR
Angiogenesis	GNG11
Angiogenesis	GNG7
Angiogenesis	GNS
Angiogenesis	ADGRF5
Angiogenesis	GPR137B
Angiogenesis	HDC
Angiogenesis	HERPUD1
Angiogenesis	HGF
Angiogenesis	HLX
Angiogenesis	HPGDS
Angiogenesis	HS3ST2
Angiogenesis	HTR2A
Angiogenesis	ICAM2
Angiogenesis	IFNAR1
Angiogenesis	IFNW1
Angiogenesis	IGF1
Angiogenesis	IL3RA
Angiogenesis	IL5RA
Angiogenesis	ITGA8
Angiogenesis	ITGA9
Angiogenesis	ITGBL1
Angiogenesis	JAM2
Angiogenesis	KCNH2
Angiogenesis	KCNJ8
Angiogenesis	KCNMB1
Angiogenesis	KCNN3
Angiogenesis	KCTD12
Angiogenesis	KDR
Angiogenesis	KIT
Angiogenesis	KL
Angiogenesis	LDB2
Angiogenesis	LEP
Angiogenesis	LGI2
Angiogenesis	LIFR
Angiogenesis	LPL
Angiogenesis	LYVE1
Angiogenesis	MAN1C1
Angiogenesis	MAOB
Angiogenesis	MAP1LC3C
Angiogenesis	MEF2C
Angiogenesis	MEOX2
Angiogenesis	MFAP4
Angiogenesis	MGP
Angiogenesis	MITF
Angiogenesis	MLPH
Angiogenesis	MMRN1
Angiogenesis	MPL
Angiogenesis	MS4A2
Angiogenesis	MYCT1
Angiogenesis	MYEF2
Angiogenesis	NAALADL1
Angiogenesis	NBEA
Angiogenesis	NOTCH4
Angiogenesis	NR5A2
Angiogenesis	NRXN3
Angiogenesis	OGN
Angiogenesis	PADI2
Angiogenesis	PAK5
Angiogenesis	PARM1
Angiogenesis	PCDH12
Angiogenesis	PCDH17
Angiogenesis	PDE1A
Angiogenesis	PDE1B
Angiogenesis	PDE3B
Angiogenesis	PDE4B
Angiogenesis	PDIA2
Angiogenesis	PECAM1
Angiogenesis	PEG3
Angiogenesis	PGM5
Angiogenesis	PHACTR1
Angiogenesis	PLCB4
Angiogenesis	PLCL1
Angiogenesis	PLXND1
Angiogenesis	PNMA2
Angiogenesis	PLPP3
Angiogenesis	PPM1H
Angiogenesis	PPP1R9A
Angiogenesis	PRELP
Angiogenesis	PRLR
Angiogenesis	PROM1
Angiogenesis	PTGIS
Angiogenesis	PTPRB
Angiogenesis	QPRT
Angiogenesis	RAI2
Angiogenesis	RARRES2
Angiogenesis	RASL12
Angiogenesis	RCAN2
Angiogenesis	RELN
Angiogenesis	RFXAP
Angiogenesis	RGL1
Angiogenesis	RGS5
Angiogenesis	S1PR1
Angiogenesis	SALL2
Angiogenesis	SCUBE3
Angiogenesis	SELENBP1
Angiogenesis	SELP
Angiogenesis	SFTPB
Angiogenesis	SIGLEC6
Angiogenesis	SLC10A2
Angiogenesis	SLC18A2
Angiogenesis	SLC1A7
Angiogenesis	SLC34A2
Angiogenesis	SLCO5A1
Angiogenesis	SLIT2
Angiogenesis	SNTB1
Angiogenesis	SOD3
Angiogenesis	SOX17
Angiogenesis	SOX5
Angiogenesis	SPARCL1
Angiogenesis	SPRY1
Angiogenesis	STARD8
Angiogenesis	STXBP6
Angiogenesis	SYNE1
Angiogenesis	SYT11
Angiogenesis	TEK
Angiogenesis	TGM2
Angiogenesis	THSD7A
Angiogenesis	TIE1
Angiogenesis	TMEM47
Angiogenesis	TNFRSF11B
Angiogenesis	TNIK
Angiogenesis	TPSAB1
Angiogenesis	VASH1
Angiogenesis	VEGFB
Angiogenesis	VWF
Angiogenesis	XPNPEP2
Angiogenesis	ZBTB10
Angiogenesis	ZEB2
Angiogenesis	ZNF215
Angiogenesis	ELTD1
Angiogenesis	CLEC14A
Angiogenesis	ECSCR
Angiogenesis	RHOJ
Angiogenesis	ESAM
Angiogenesis	GPR116
Angiogenesis	ROBO4
Angiogenesis	COL15A1
Angiogenesis	CALCRL
Angiogenesis	CLEC3B
Angiogenesis	PLVAP
Angiogenesis	LRRC32
Angiogenesis	EBF1
Angiogenesis	ADCY4
Angiogenesis	GPR124
Angiogenesis	APLNR
Angiogenesis	TM4SF18
Angiogenesis	CNRIP1
Angiogenesis	ZNF423
Angiogenesis	GIMAP8
Angiogenesis	PDGFD
TNFα response	TNFRSF11B
TNFα response	TNFSF10
TNFα response	TNFSF11
TNFα response	TNFSF12
TNFα response	TNFSF13
TNFα response	TNFSF13B
TNFα response	TNFSF14
TNFα response	TNFSF15
TNFα response	TNFSF18
TNFα response	TNFSF4
TNFα response	TNFSF8
TNFα response	TNFSF9
TNFα response	TNFRSF10B
TNFα response	TNFRSF10C
TNFα response	TNFRSF10D
TNFα response	TNFRSF11A
TNFα response	TNFRSF12A
TNFα response	TNFRSF13B
TNFα response	TNFRSF13C
TNFα response	TNFRSF14
TNFα response	TNFRSF17
TNFα response	TNFRSF18
TNFα response	TNFRSF19
TNFα response	TNFRSF1A
TNFα response	TNFRSF1B
TNFα response	TNFRSF21
TNFα response	TNFRSF25
TNFα response	TNFRSF4
TNFα response	TNFRSF6B
TNFα response	TNFRSF8
TNFα response	TNFRSF9
hepatic_fibrosis	BAMBI
hepatic_fibrosis	BAX
hepatic_fibrosis	CCL21
hepatic_fibrosis	CCR7
hepatic_fibrosis	CSF1
hepatic_fibrosis	CXCL9
hepatic_fibrosis	CXCR3
hepatic_fibrosis	EDNRB
hepatic_fibrosis	EGF
hepatic_fibrosis	EGFR
hepatic_fibrosis	FAS
hepatic_fibrosis	FGFR2
hepatic_fibrosis	IFNAR2
hepatic_fibrosis	IFNGR2
hepatic_fibrosis	IL10
hepatic_fibrosis	IL6
hepatic_fibrosis	IL6R
hepatic_fibrosis	MMP1
hepatic_fibrosis	MMP9
hepatic_fibrosis	STAT1
hepatic_fibrosis	TLR4
Differentiation	CRYBG2
Differentiation	ALOXE3
Differentiation	BDKRB2
Differentiation	BMP2
Differentiation	BMP7
Differentiation	C14orf2
Differentiation	C1orf116
Differentiation	CALB2
Differentiation	CAV1
Differentiation	CD1A
Differentiation	CD207
Differentiation	CD58
Differentiation	CDH3
Differentiation	CDSN
Differentiation	CHAC1
Differentiation	CHST2
Differentiation	CLIC3
Differentiation	CLTB
Differentiation	CNTFR
Differentiation	CRCT1
Differentiation	CSF2
Differentiation	CSF3
Differentiation	CXCL1
Differentiation	CXCR1
Differentiation	CXCR2
Differentiation	DHRS1
Differentiation	DHRS9
Differentiation	DSC1
Differentiation	DSG1
Differentiation	DSP
Differentiation	EHD2
Differentiation	EPO
Differentiation	EPS8L1
Differentiation	EVPL
Differentiation	FSCN1
Differentiation	GJB3
Differentiation	GJB5
Differentiation	GNA15
Differentiation	HIST1H2AE
Differentiation	HSPA2
Differentiation	HSPA4
Differentiation	IFNGR1
Differentiation	IL18
Differentiation	IL19
Differentiation	IL1A
Differentiation	IL1B
Differentiation	IL36G
Differentiation	IL1R2
Differentiation	IL1RN
Differentiation	IL20RA
Differentiation	IL22
Differentiation	IL22RA1
Differentiation	IL24
Differentiation	IL4R
Differentiation	IVL
Differentiation	JUP
Differentiation	TLDC1
Differentiation	KLK7
Differentiation	KRT1
Differentiation	KRT14
Differentiation	KRT16
Differentiation	KRT6A
Differentiation	KRT6B
Differentiation	LAD1
Differentiation	LAMC2
Differentiation	LTBR
Differentiation	LYPD3
Differentiation	MAP7D1
Differentiation	MMP3
Differentiation	MXD1
Differentiation	NOD2
Differentiation	OVOL1
Differentiation	PDZK1IP1
Differentiation	PGLYRP4
Differentiation	PKP3
Differentiation	PLEK2
Differentiation	PLIN3
Differentiation	PPBP
Differentiation	PPL
Differentiation	PPP1R13L
Differentiation	PROCR
Differentiation	PSMC2
Differentiation	PSMD14
Differentiation	PSMD1
Differentiation	PSMD3
Differentiation	PSMD6
Differentiation	PSMD7
Differentiation	CAVIN1
Differentiation	PVR
Differentiation	RHOD
Differentiation	RIN1
Differentiation	RPS6KA4
Differentiation	S100A12
Differentiation	S100A2
Differentiation	S100A7
Differentiation	S100A8
Differentiation	S100A9
Differentiation	SAMD9
Differentiation	SCEL
Differentiation	SFN
Differentiation	SEM1
Differentiation	SLC39A2
Differentiation	SLURP1
Differentiation	SPRR1A
Differentiation	SPRR1B
Differentiation	SULT2B1
Differentiation	TGM1
Differentiation	TNFRSF12A
Differentiation	TNFRSF1A
Differentiation	TNFSF9
Differentiation	TNNT2
Differentiation	TUBA4A
Differentiation	TUBB6
Differentiation	ZNF185
Proliferation	CDKN3
Proliferation	NDC80
Proliferation	RNASEH2A
Proliferation	CENPA
Proliferation	SMC2
Proliferation	CENPE
Proliferation	RAD51AP1
Proliferation	PLK4
Proliferation	NMU
Proliferation	KIF2C
Proliferation	TMSB15A
Proliferation	UBE2C
Proliferation	CHEK1
Proliferation	ZWINT
Proliferation	OIP5
Proliferation	CRABP1
Proliferation	ECT2
Proliferation	EIF4EBP1
Proliferation	EZH2
Proliferation	FEN1
Proliferation	HSPA4L
Proliferation	TPX2
Proliferation	FOXM1
Proliferation	NCAPH
Proliferation	PRAME
Proliferation	PDSS1
Proliferation	KIF4A
Proliferation	RAD54B
Proliferation	ASPM
Proliferation	FBXO5
Proliferation	ATAD2
Proliferation	RACGAP1
Proliferation	GPSM2
Proliferation	DONSON
Proliferation	HMMR
Proliferation	BIRC5
Proliferation	KIF11
Proliferation	LMNB1
Proliferation	MAD2L1
Proliferation	MCM4
Proliferation	MCM5
Proliferation	MKI67
Proliferation	MMP1
Proliferation	MYBL1
Proliferation	MYBL2
Proliferation	NEK2
Proliferation	NUSAP1
Proliferation	GTSE1
Proliferation	GINS2
Proliferation	PLK1
Proliferation	FAM64A
Proliferation	ERCC6L
Proliferation	NCAPG2
Proliferation	CEP55
Proliferation	FANCI
Proliferation	HJURP
Proliferation	MCM10
Proliferation	DEPDC1
Proliferation	C1orf112
Proliferation	CENPN
Proliferation	PBK
Proliferation	KIF15
Proliferation	CIAPIN1
Proliferation	ACTR3B
Proliferation	GPR126
Proliferation	SPC25
Proliferation	RAD21
Proliferation	RFC3
Proliferation	RFC4
Proliferation	RRM2
Proliferation	NCAPG
Proliferation	STIL
Proliferation	SKP2
Proliferation	SOX11
Proliferation	SQLE
Proliferation	AURKA
Proliferation	TAF2
Proliferation	TARS
Proliferation	BUB1B
Proliferation	TK1
Proliferation	TMPO
Proliferation	TOP2A
Proliferation	PHLDA2
Proliferation	TTK
Proliferation	LRP8
Proliferation	DSCC1
Proliferation	MLF1IP
Proliferation	E2F8
Proliferation	SHCBP1
Proliferation	SLC7A5
Proliferation	ANP32E
Proliferation	KIF18A
Proliferation	CDC7
Proliferation	CDC45
Proliferation	RAD54L
Proliferation	TTF2
Proliferation	PIR
Proliferation	ACTL6A
Proliferation	GGH
Proliferation	CCNA2
Proliferation	CCNB1
Proliferation	PRC1
Proliferation	CCNB2
Proliferation	CCNE2
Proliferation	EXO1
Proliferation	AURKB
Proliferation	PTTG1
Proliferation	TRIP13
Proliferation	KIF23
Proliferation	APOBEC3B
Proliferation	MTFR1
Proliferation	ESPL1
Proliferation	DLGAP5
Proliferation	CDK1
Proliferation	MELK
Proliferation	GINS1
Proliferation	CDC6
Proliferation	CDC20
Proliferation	NCAPD2
Proliferation	KIF14
DDR_response	ALKBH2
DDR_response	ALKBH3
DDR_response	APEX1
DDR_response	APEX2
DDR_response	APLF
DDR_response	ATM
DDR_response	ATR
DDR_response	ATRIP
DDR_response	BLM
DDR_response	BRCA1
DDR_response	BRCA2
DDR_response	BRIP1
DDR_response	CCNH
DDR_response	CDK7
DDR_response	CETN2
DDR_response	CHAF1A
DDR_response	CHEK1
DDR_response	CHEK2
DDR_response	CLK2
DDR_response	DCLRE1C
DDR_response	DDB1
DDR_response	DDB2
DDR_response	DUT
DDR_response	ENDOV
DDR_response	ERCC1
DDR_response	ERCC2
DDR_response	ERCC3
DDR_response	ERCC4
DDR_response	ERCC5
DDR_response	ERCC6
DDR_response	ERCC8
DDR_response	FAN1
DDR_response	FANCA
DDR_response	FANCB
DDR_response	FANCC
DDR_response	FANCD2
DDR_response	FANCE
DDR_response	FANCF
DDR_response	FANCG
DDR_response	FANCL
DDR_response	FANCM
DDR_response	GTF2H1
DDR_response	GTF2H2
DDR_response	GTF2H3
DDR_response	GTF2H4
DDR_response	GTF2H5
DDR_response	H2AFX
DDR_response	HLTF
DDR_response	HUS1
DDR_response	LIG1
DDR_response	LIG3
DDR_response	LIG4
DDR_response	MBD4
DDR_response	MDC1
DDR_response	MGMT
DDR_response	MLH1
DDR_response	MLH3
DDR_response	MMS19
DDR_response	MNAT1
DDR_response	MPG
DDR_response	MSH2
DDR_response	MSH3
DDR_response	MSH4
DDR_response	MSH5
DDR_response	MSH6
DDR_response	MUTYH
DDR_response	NEIL1
DDR_response	NEIL2
DDR_response	NEIL3
DDR_response	NHEJ1
DDR_response	NTHL1
DDR_response	NUDT1
DDR_response	OGG1
DDR_response	PALB2
DDR_response	PARP1
DDR_response	PARP2
DDR_response	PARP3
DDR_response	PCNA
DDR_response	PMS1
DDR_response	PMS2
DDR_response	PNKP
DDR_response	POLB
DDR_response	POLD1
DDR_response	POLE
DDR_response	POLG
DDR_response	POLH
DDR_response	POLL
DDR_response	POLM
DDR_response	POLQ
DDR_response	PRKDC
DDR_response	RAD1
DDR_response	RAD17
DDR_response	RAD18
DDR_response	RAD23A
DDR_response	RAD23B
DDR_response	RAD51C
DDR_response	RAD9A
DDR_response	RECQL4
DDR_response	RECQL5
DDR_response	RIF1
DDR_response	RNF168
DDR_response	RNF4
DDR_response	RNF8
DDR_response	RPA1
DDR_response	RPA2
DDR_response	RPA3
DDR_response	RPA4
DDR_response	RRM2B
DDR_response	SETMAR
DDR_response	SHPRH
DDR_response	SMUG1
DDR_response	TDP1
DDR_response	TDP2
DDR_response	TOPBP1
DDR_response	TP53
DDR_response	TREX1
DDR_response	UBE2A
DDR_response	UBE2B
DDR_response	UBE2N
DDR_response	UBE2V2
DDR_response	UNG
DDR_response	UVSSA
DDR_response	WRN
DDR_response	XAB2
DDR_response	XPA
DDR_response	XPC
DDR_response	XRCC1
DDR_response	XRCC4
DDR_response	XRCC5
DDR_response	XRCC6
wound healing	ADH1A
wound healing	APOH
wound healing	BMPR1B
wound healing	DST
wound healing	CAPN6
wound healing	CD86
wound healing	CDK4
wound healing	COL17A1
wound healing	COX7B
wound healing	CSF3
wound healing	CTGF
wound healing	CTSK
wound healing	DMBT1
wound healing	ARID3A
wound healing	DSC3
wound healing	ELANE
wound healing	EYA4
wound healing	F3
wound healing	FABP4
wound healing	FAP
wound healing	FBLN1
wound healing	EFEMP1
wound healing	FPR1
wound healing	FRZB
wound healing	GJB5
wound healing	HBB
wound healing	HDC
wound healing	HMGA1
wound healing	HPCAL1
wound healing	CYR61
wound healing	IL1B
wound healing	IL13RA2
wound healing	IDO1
wound healing	INHBA
wound healing	KRT6A
wound healing	KRT6B
wound healing	KRT34
wound healing	AFF3
wound healing	LAMA3
wound healing	LAMC2
wound healing	LTBP2
wound healing	LUM
wound healing	MSMB
wound healing	ND4
wound healing	NODAL
wound healing	OGN
wound healing	PCDH8
wound healing	PDGFRL
wound healing	PER1
wound healing	PFKFB3
wound healing	PITX1
wound healing	PML
wound healing	PNLIPRP2
wound healing	S100A8
wound healing	SAA4
wound healing	CCL2
wound healing	TGFB2
wound healing	THBS1
wound healing	TLR2
wound healing	UGT2B17
wound healing	ZIC2
wound healing	TFPI2
wound healing	NR4A3
wound healing	SPARCL1
wound healing	TP63
wound healing	PER2
wound healing	SPAG9
wound healing	CXCL14
wound healing	TMCC2
wound healing	TNFSF15
wound healing	CLEC4M
wound healing	NPM2
wound healing	HOXB13
wound healing	PPP6R1
wound healing	SULF1
wound healing	DICER1
wound healing	ABI3BP
wound healing	EGFL6
wound healing	TIPARP
wound healing	RGS22
wound healing	IGLV2-14
wound healing	A1CF
wound healing	TREM1
wound healing	PGPEP1
wound healing	RGMA
wound healing	ADAMTS9
wound healing	TENM2
wound healing	MKL2
wound healing	VPS18
wound healing	CACHD1
wound healing	GUF1
wound healing	ELSPBP1
wound healing	ZBED2
wound healing	LRRC2
wound healing	CHPF
wound healing	HMBOX1
wound healing	TMC5
wound healing	BAALC
wound healing	APOLD1
wound healing	VMP1
wound healing	SPACA1
wound healing	FRMD8P1
wound healing	FAM71F1
wound healing	TNS4
wound healing	KIAA1751
wound healing	CROCCP3
wound healing	OSR2
wound healing	LRR1
wound healing	TMEM139
wound healing	CCBE1
wound healing	FAM19A4
wound healing	BMPER
wound healing	YPEL4
wound healing	JAKMIP3
wound healing	LOC284454
wound healing	KRT6C
wound healing	ZNF713
wound healing	SIMC1
wound healing	LOC389332
wound healing	SPDYE8P
wound healing	LOC440934
wound healing	MUC5B
wound healing	C13orf45
wound healing	KRT17P3
wound healing	LOC100131138

## Sheet: Table S2
Table S2. Immune subtypes of HCC samples
tumor_id	Unsupervised cluster	SVM classification	dataset
TCGA-2V-A95S-01A	1	IM_TypeA	LIHC
TCGA-2Y-A9GS-01A	2	IM_TypeA	LIHC
TCGA-2Y-A9GT-01A	3	IM_TypeB	LIHC
TCGA-2Y-A9GU-01A	2	IM_TypeB	LIHC
TCGA-2Y-A9GV-01A	2	IM_TypeB	LIHC
TCGA-2Y-A9GW-01A	1	IM_TypeA	LIHC
TCGA-2Y-A9GX-01A	3	IM_TypeB	LIHC
TCGA-2Y-A9GY-01A	1	IM_TypeA	LIHC
TCGA-2Y-A9GZ-01A	2	IM_TypeB	LIHC
TCGA-2Y-A9H0-01A	2	IM_TypeA	LIHC
TCGA-2Y-A9H1-01A	2	IM_TypeA	LIHC
TCGA-2Y-A9H2-01A	1	IM_TypeA	LIHC
TCGA-2Y-A9H3-01A	3	IM_TypeA	LIHC
TCGA-2Y-A9H4-01A	3	IM_TypeB	LIHC
TCGA-2Y-A9H5-01A	3	IM_TypeB	LIHC
TCGA-2Y-A9H6-01A	3	IM_TypeB	LIHC
TCGA-2Y-A9H7-01A	3	IM_TypeB	LIHC
TCGA-2Y-A9H8-01A	1	IM_TypeA	LIHC
TCGA-2Y-A9H9-01A	3	IM_TypeB	LIHC
TCGA-2Y-A9HA-01A	1	IM_TypeA	LIHC
TCGA-2Y-A9HB-01A	3	IM_TypeB	LIHC
TCGA-3K-AAZ8-01A	3	IM_TypeB	LIHC
TCGA-4R-AA8I-01A	1	IM_TypeB	LIHC
TCGA-5C-A9VG-01A	2	IM_TypeB	LIHC
TCGA-5C-A9VH-01A	3	IM_TypeB	LIHC
TCGA-5C-AAPD-01A	1	IM_TypeA	LIHC
TCGA-5R-AA1C-01A	2	IM_TypeB	LIHC
TCGA-5R-AA1D-01A	2	IM_TypeB	LIHC
TCGA-5R-AAAM-01A	2	IM_TypeB	LIHC
TCGA-BC-4072-01B	3	IM_TypeA	LIHC
TCGA-BC-4073-01B	1	IM_TypeA	LIHC
TCGA-BC-A10Q-01A	2	IM_TypeB	LIHC
TCGA-BC-A10R-01A	2	IM_TypeB	LIHC
TCGA-BC-A10S-01A	2	IM_TypeB	LIHC
TCGA-BC-A10T-01A	2	IM_TypeB	LIHC
TCGA-BC-A10U-01A	2	IM_TypeA	LIHC
TCGA-BC-A10W-01A	2	IM_TypeA	LIHC
TCGA-BC-A10X-01A	3	IM_TypeB	LIHC
TCGA-BC-A10Y-01A	2	IM_TypeB	LIHC
TCGA-BC-A10Z-01A	3	IM_TypeB	LIHC
TCGA-BC-A110-01A	2	IM_TypeB	LIHC
TCGA-BC-A112-01A	3	IM_TypeA	LIHC
TCGA-BC-A216-01A	3	IM_TypeB	LIHC
TCGA-BC-A217-01A	2	IM_TypeA	LIHC
TCGA-BC-A3KF-01A	2	IM_TypeB	LIHC
TCGA-BC-A3KG-01A	3	IM_TypeB	LIHC
TCGA-BC-A5W4-01A	1	IM_TypeA	LIHC
TCGA-BC-A69H-01A	1	IM_TypeA	LIHC
TCGA-BC-A69I-01A	2	IM_TypeB	LIHC
TCGA-BC-A8YO-01A	3	IM_TypeA	LIHC
TCGA-BD-A2L6-01A	3	IM_TypeB	LIHC
TCGA-BD-A3EP-01A	3	IM_TypeB	LIHC
TCGA-BD-A3ER-01A	2	IM_TypeB	LIHC
TCGA-BW-A5NO-01A	1	IM_TypeA	LIHC
TCGA-BW-A5NP-01A	3	IM_TypeB	LIHC
TCGA-BW-A5NQ-01A	2	IM_TypeA	LIHC
TCGA-CC-5258-01A	1	IM_TypeA	LIHC
TCGA-CC-5259-01A	1	IM_TypeA	LIHC
TCGA-CC-5260-01A	2	IM_TypeA	LIHC
TCGA-CC-5261-01A	3	IM_TypeA	LIHC
TCGA-CC-5262-01A	1	IM_TypeA	LIHC
TCGA-CC-5263-01A	2	IM_TypeA	LIHC
TCGA-CC-5264-01A	2	IM_TypeA	LIHC
TCGA-CC-A123-01A	1	IM_TypeA	LIHC
TCGA-CC-A1HT-01A	2	IM_TypeA	LIHC
TCGA-CC-A3M9-01A	2	IM_TypeA	LIHC
TCGA-CC-A3MA-01A	1	IM_TypeA	LIHC
TCGA-CC-A3MB-01A	2	IM_TypeB	LIHC
TCGA-CC-A3MC-01A	2	IM_TypeA	LIHC
TCGA-CC-A5UC-01A	1	IM_TypeA	LIHC
TCGA-CC-A5UD-01A	2	IM_TypeA	LIHC
TCGA-CC-A5UE-01A	1	IM_TypeA	LIHC
TCGA-CC-A7IE-01A	1	IM_TypeA	LIHC
TCGA-CC-A7IF-01A	2	IM_TypeB	LIHC
TCGA-CC-A7IG-01A	1	IM_TypeA	LIHC
TCGA-CC-A7IH-01A	2	IM_TypeB	LIHC
TCGA-CC-A7II-01A	2	IM_TypeA	LIHC
TCGA-CC-A7IJ-01A	2	IM_TypeA	LIHC
TCGA-CC-A7IK-01A	3	IM_TypeB	LIHC
TCGA-CC-A7IL-01A	2	IM_TypeB	LIHC
TCGA-CC-A8HS-01A	1	IM_TypeA	LIHC
TCGA-CC-A8HT-01A	2	IM_TypeA	LIHC
TCGA-CC-A8HU-01A	2	IM_TypeA	LIHC
TCGA-CC-A8HV-01A	3	IM_TypeB	LIHC
TCGA-CC-A9FS-01A	2	IM_TypeB	LIHC
TCGA-CC-A9FU-01A	1	IM_TypeA	LIHC
TCGA-CC-A9FV-01A	2	IM_TypeB	LIHC
TCGA-CC-A9FW-01A	1	IM_TypeA	LIHC
TCGA-DD-A113-01A	1	IM_TypeA	LIHC
TCGA-DD-A114-01A	1	IM_TypeA	LIHC
TCGA-DD-A115-01A	3	IM_TypeB	LIHC
TCGA-DD-A116-01A	2	IM_TypeA	LIHC
TCGA-DD-A118-01A	2	IM_TypeB	LIHC
TCGA-DD-A119-01A	1	IM_TypeA	LIHC
TCGA-DD-A11A-01A	2	IM_TypeB	LIHC
TCGA-DD-A11B-01A	2	IM_TypeB	LIHC
TCGA-DD-A11C-01A	2	IM_TypeB	LIHC
TCGA-DD-A11D-01A	3	IM_TypeB	LIHC
TCGA-DD-A1EA-01A	1	IM_TypeA	LIHC
TCGA-DD-A1EB-01A	3	IM_TypeB	LIHC
TCGA-DD-A1EC-01A	2	IM_TypeA	LIHC
TCGA-DD-A1ED-01A	2	IM_TypeB	LIHC
TCGA-DD-A1EE-01A	3	IM_TypeB	LIHC
TCGA-DD-A1EF-01A	1	IM_TypeA	LIHC
TCGA-DD-A1EG-01A	1	IM_TypeA	LIHC
TCGA-DD-A1EH-01A	3	IM_TypeB	LIHC
TCGA-DD-A1EI-01A	3	IM_TypeB	LIHC
TCGA-DD-A1EJ-01A	1	IM_TypeA	LIHC
TCGA-DD-A1EK-01A	3	IM_TypeA	LIHC
TCGA-DD-A1EL-01A	1	IM_TypeA	LIHC
TCGA-DD-A39V-01A	2	IM_TypeA	LIHC
TCGA-DD-A39W-01A	2	IM_TypeB	LIHC
TCGA-DD-A39X-01A	2	IM_TypeA	LIHC
TCGA-DD-A39Y-01A	2	IM_TypeA	LIHC
TCGA-DD-A39Z-01A	1	IM_TypeB	LIHC
TCGA-DD-A3A1-01A	2	IM_TypeA	LIHC
TCGA-DD-A3A2-01A	3	IM_TypeB	LIHC
TCGA-DD-A3A3-01A	1	IM_TypeA	LIHC
TCGA-DD-A3A4-01A	2	IM_TypeB	LIHC
TCGA-DD-A3A5-01A	1	IM_TypeB	LIHC
TCGA-DD-A3A6-01A	2	IM_TypeB	LIHC
TCGA-DD-A3A7-01A	1	IM_TypeA	LIHC
TCGA-DD-A3A8-01A	3	IM_TypeB	LIHC
TCGA-DD-A3A9-01A	3	IM_TypeB	LIHC
TCGA-DD-A4NA-01A	2	IM_TypeA	LIHC
TCGA-DD-A4NB-01A	3	IM_TypeB	LIHC
TCGA-DD-A4ND-01A	3	IM_TypeB	LIHC
TCGA-DD-A4NE-01A	2	IM_TypeB	LIHC
TCGA-DD-A4NF-01A	2	IM_TypeB	LIHC
TCGA-DD-A4NG-01A	3	IM_TypeB	LIHC
TCGA-DD-A4NH-01A	1	IM_TypeA	LIHC
TCGA-DD-A4NI-01A	3	IM_TypeB	LIHC
TCGA-DD-A4NJ-01A	3	IM_TypeB	LIHC
TCGA-DD-A4NK-01A	3	IM_TypeB	LIHC
TCGA-DD-A4NL-01A	2	IM_TypeB	LIHC
TCGA-DD-A4NN-01A	2	IM_TypeB	LIHC
TCGA-DD-A4NO-01A	3	IM_TypeB	LIHC
TCGA-DD-A4NP-01A	3	IM_TypeB	LIHC
TCGA-DD-A4NQ-01A	1	IM_TypeA	LIHC
TCGA-DD-A4NR-01A	2	IM_TypeA	LIHC
TCGA-DD-A4NS-01A	3	IM_TypeB	LIHC
TCGA-DD-A4NV-01A	2	IM_TypeB	LIHC
TCGA-DD-A73A-01A	3	IM_TypeB	LIHC
TCGA-DD-A73B-01A	2	IM_TypeB	LIHC
TCGA-DD-A73C-01A	2	IM_TypeB	LIHC
TCGA-DD-A73D-01A	3	IM_TypeB	LIHC
TCGA-DD-A73E-01A	3	IM_TypeB	LIHC
TCGA-DD-A73F-01A	3	IM_TypeB	LIHC
TCGA-DD-A73G-01A	2	IM_TypeA	LIHC
TCGA-DD-AA3A-01A	1	IM_TypeA	LIHC
TCGA-DD-AAC8-01A	2	IM_TypeB	LIHC
TCGA-DD-AAC9-01A	2	IM_TypeA	LIHC
TCGA-DD-AACA-01A	3	IM_TypeB	LIHC
TCGA-DD-AACA-02A	2	IM_TypeB	LIHC
TCGA-DD-AACA-02B	2	IM_TypeB	LIHC
TCGA-DD-AACB-01A	1	IM_TypeA	LIHC
TCGA-DD-AACC-01A	1	IM_TypeA	LIHC
TCGA-DD-AACD-01A	2	IM_TypeA	LIHC
TCGA-DD-AACE-01A	3	IM_TypeB	LIHC
TCGA-DD-AACF-01A	2	IM_TypeA	LIHC
TCGA-DD-AACG-01A	2	IM_TypeA	LIHC
TCGA-DD-AACH-01A	3	IM_TypeA	LIHC
TCGA-DD-AACI-01A	2	IM_TypeA	LIHC
TCGA-DD-AACJ-01A	3	IM_TypeB	LIHC
TCGA-DD-AACK-01A	3	IM_TypeB	LIHC
TCGA-DD-AACL-01A	1	IM_TypeA	LIHC
TCGA-DD-AACN-01A	3	IM_TypeB	LIHC
TCGA-DD-AACO-01A	2	IM_TypeB	LIHC
TCGA-DD-AACP-01A	3	IM_TypeA	LIHC
TCGA-DD-AACQ-01A	1	IM_TypeA	LIHC
TCGA-DD-AACS-01A	3	IM_TypeB	LIHC
TCGA-DD-AACT-01A	3	IM_TypeB	LIHC
TCGA-DD-AACU-01A	3	IM_TypeB	LIHC
TCGA-DD-AACV-01A	2	IM_TypeB	LIHC
TCGA-DD-AACW-01A	3	IM_TypeB	LIHC
TCGA-DD-AACX-01A	2	IM_TypeB	LIHC
TCGA-DD-AACY-01A	2	IM_TypeB	LIHC
TCGA-DD-AACZ-01A	2	IM_TypeA	LIHC
TCGA-DD-AAD0-01A	1	IM_TypeA	LIHC
TCGA-DD-AAD1-01A	3	IM_TypeB	LIHC
TCGA-DD-AAD2-01A	1	IM_TypeA	LIHC
TCGA-DD-AAD3-01A	3	IM_TypeB	LIHC
TCGA-DD-AAD5-01A	3	IM_TypeA	LIHC
TCGA-DD-AAD6-01A	3	IM_TypeA	LIHC
TCGA-DD-AAD8-01A	2	IM_TypeB	LIHC
TCGA-DD-AADA-01A	3	IM_TypeB	LIHC
TCGA-DD-AADB-01A	1	IM_TypeA	LIHC
TCGA-DD-AADC-01A	3	IM_TypeA	LIHC
TCGA-DD-AADD-01A	3	IM_TypeA	LIHC
TCGA-DD-AADF-01A	1	IM_TypeA	LIHC
TCGA-DD-AADG-01A	1	IM_TypeB	LIHC
TCGA-DD-AADI-01A	3	IM_TypeB	LIHC
TCGA-DD-AADJ-01A	3	IM_TypeB	LIHC
TCGA-DD-AADK-01A	3	IM_TypeA	LIHC
TCGA-DD-AADL-01A	3	IM_TypeB	LIHC
TCGA-DD-AADM-01A	1	IM_TypeA	LIHC
TCGA-DD-AADN-01A	1	IM_TypeA	LIHC
TCGA-DD-AADO-01A	1	IM_TypeA	LIHC
TCGA-DD-AADP-01A	3	IM_TypeB	LIHC
TCGA-DD-AADQ-01A	3	IM_TypeA	LIHC
TCGA-DD-AADR-01A	3	IM_TypeB	LIHC
TCGA-DD-AADS-01A	2	IM_TypeA	LIHC
TCGA-DD-AADU-01A	1	IM_TypeA	LIHC
TCGA-DD-AADV-01A	3	IM_TypeB	LIHC
TCGA-DD-AADW-01A	1	IM_TypeB	LIHC
TCGA-DD-AADY-01A	2	IM_TypeB	LIHC
TCGA-DD-AAE0-01A	1	IM_TypeA	LIHC
TCGA-DD-AAE1-01A	3	IM_TypeB	LIHC
TCGA-DD-AAE2-01A	1	IM_TypeB	LIHC
TCGA-DD-AAE3-01A	2	IM_TypeB	LIHC
TCGA-DD-AAE4-01A	3	IM_TypeB	LIHC
TCGA-DD-AAE6-01A	3	IM_TypeB	LIHC
TCGA-DD-AAE7-01A	3	IM_TypeB	LIHC
TCGA-DD-AAE9-01A	2	IM_TypeA	LIHC
TCGA-DD-AAEA-01A	3	IM_TypeA	LIHC
TCGA-DD-AAEB-01A	3	IM_TypeB	LIHC
TCGA-DD-AAED-01A	1	IM_TypeA	LIHC
TCGA-DD-AAEE-01A	3	IM_TypeB	LIHC
TCGA-DD-AAEG-01A	1	IM_TypeA	LIHC
TCGA-DD-AAEH-01A	1	IM_TypeB	LIHC
TCGA-DD-AAEI-01A	2	IM_TypeB	LIHC
TCGA-DD-AAEK-01A	1	IM_TypeB	LIHC
TCGA-DD-AAVP-01A	3	IM_TypeB	LIHC
TCGA-DD-AAVQ-01A	1	IM_TypeA	LIHC
TCGA-DD-AAVR-01A	2	IM_TypeB	LIHC
TCGA-DD-AAVS-01A	2	IM_TypeB	LIHC
TCGA-DD-AAVU-01A	1	IM_TypeA	LIHC
TCGA-DD-AAVV-01A	1	IM_TypeA	LIHC
TCGA-DD-AAVW-01A	3	IM_TypeB	LIHC
TCGA-DD-AAVX-01A	2	IM_TypeB	LIHC
TCGA-DD-AAVY-01A	3	IM_TypeB	LIHC
TCGA-DD-AAVZ-01A	3	IM_TypeB	LIHC
TCGA-DD-AAW0-01A	1	IM_TypeA	LIHC
TCGA-DD-AAW1-01A	1	IM_TypeB	LIHC
TCGA-DD-AAW2-01A	3	IM_TypeB	LIHC
TCGA-DD-AAW3-01A	3	IM_TypeB	LIHC
TCGA-ED-A459-01A	2	IM_TypeA	LIHC
TCGA-ED-A4XI-01A	2	IM_TypeB	LIHC
TCGA-ED-A5KG-01A	3	IM_TypeB	LIHC
TCGA-ED-A627-01A	3	IM_TypeB	LIHC
TCGA-ED-A66X-01A	1	IM_TypeA	LIHC
TCGA-ED-A66Y-01A	1	IM_TypeA	LIHC
TCGA-ED-A7PX-01A	1	IM_TypeA	LIHC
TCGA-ED-A7PY-01A	2	IM_TypeB	LIHC
TCGA-ED-A7PZ-01A	1	IM_TypeA	LIHC
TCGA-ED-A7XO-01A	2	IM_TypeB	LIHC
TCGA-ED-A7XP-01A	3	IM_TypeB	LIHC
TCGA-ED-A82E-01A	3	IM_TypeA	LIHC
TCGA-ED-A8O5-01A	3	IM_TypeB	LIHC
TCGA-ED-A8O6-01A	3	IM_TypeA	LIHC
TCGA-ED-A97K-01A	1	IM_TypeA	LIHC
TCGA-EP-A12J-01A	2	IM_TypeB	LIHC
TCGA-EP-A26S-01A	2	IM_TypeB	LIHC
TCGA-EP-A2KA-01A	1	IM_TypeA	LIHC
TCGA-EP-A2KB-01A	2	IM_TypeB	LIHC
TCGA-EP-A2KC-01A	1	IM_TypeA	LIHC
TCGA-EP-A3JL-01A	2	IM_TypeA	LIHC
TCGA-EP-A3RK-01A	2	IM_TypeA	LIHC
TCGA-ES-A2HS-01A	2	IM_TypeB	LIHC
TCGA-ES-A2HT-01A	2	IM_TypeA	LIHC
TCGA-FV-A23B-01A	2	IM_TypeB	LIHC
TCGA-FV-A2QQ-01A	1	IM_TypeA	LIHC
TCGA-FV-A2QR-01A	1	IM_TypeB	LIHC
TCGA-FV-A3I0-01A	2	IM_TypeA	LIHC
TCGA-FV-A3I1-01A	1	IM_TypeA	LIHC
TCGA-FV-A3R2-01A	3	IM_TypeB	LIHC
TCGA-FV-A3R3-01A	2	IM_TypeB	LIHC
TCGA-FV-A495-01A	3	IM_TypeA	LIHC
TCGA-FV-A496-01A	3	IM_TypeB	LIHC
TCGA-FV-A4ZP-01A	1	IM_TypeA	LIHC
TCGA-FV-A4ZQ-01A	1	IM_TypeA	LIHC
TCGA-G3-A25S-01A	2	IM_TypeA	LIHC
TCGA-G3-A25T-01A	1	IM_TypeA	LIHC
TCGA-G3-A25U-01A	3	IM_TypeB	LIHC
TCGA-G3-A25V-01A	3	IM_TypeB	LIHC
TCGA-G3-A25X-01A	2	IM_TypeA	LIHC
TCGA-G3-A25Y-01A	3	IM_TypeB	LIHC
TCGA-G3-A25Z-01A	3	IM_TypeB	LIHC
TCGA-G3-A3CG-01A	3	IM_TypeB	LIHC
TCGA-G3-A3CH-01A	3	IM_TypeB	LIHC
TCGA-G3-A3CI-01A	3	IM_TypeB	LIHC
TCGA-G3-A3CJ-01A	3	IM_TypeB	LIHC
TCGA-G3-A3CK-01A	1	IM_TypeB	LIHC
TCGA-G3-A5SI-01A	2	IM_TypeB	LIHC
TCGA-G3-A5SJ-01A	1	IM_TypeA	LIHC
TCGA-G3-A5SK-01A	2	IM_TypeB	LIHC
TCGA-G3-A5SL-01A	3	IM_TypeB	LIHC
TCGA-G3-A5SM-01A	1	IM_TypeA	LIHC
TCGA-G3-A6UC-01A	3	IM_TypeB	LIHC
TCGA-G3-A7M5-01A	3	IM_TypeB	LIHC
TCGA-G3-A7M6-01A	3	IM_TypeB	LIHC
TCGA-G3-A7M7-01A	2	IM_TypeA	LIHC
TCGA-G3-A7M8-01A	2	IM_TypeB	LIHC
TCGA-G3-A7M9-01A	1	IM_TypeA	LIHC
TCGA-G3-AAUZ-01A	3	IM_TypeB	LIHC
TCGA-G3-AAV0-01A	3	IM_TypeB	LIHC
TCGA-G3-AAV1-01A	2	IM_TypeB	LIHC
TCGA-G3-AAV2-01A	2	IM_TypeB	LIHC
TCGA-G3-AAV3-01A	1	IM_TypeA	LIHC
TCGA-G3-AAV4-01A	3	IM_TypeB	LIHC
TCGA-G3-AAV5-01A	3	IM_TypeB	LIHC
TCGA-G3-AAV6-01A	1	IM_TypeA	LIHC
TCGA-G3-AAV7-01A	1	IM_TypeA	LIHC
TCGA-GJ-A3OU-01A	1	IM_TypeA	LIHC
TCGA-GJ-A6C0-01A	1	IM_TypeA	LIHC
TCGA-GJ-A9DB-01A	3	IM_TypeB	LIHC
TCGA-HP-A5MZ-01A	3	IM_TypeB	LIHC
TCGA-HP-A5N0-01A	3	IM_TypeB	LIHC
TCGA-K7-A5RF-01A	1	IM_TypeB	LIHC
TCGA-K7-A5RG-01A	1	IM_TypeA	LIHC
TCGA-K7-A6G5-01A	2	IM_TypeB	LIHC
TCGA-K7-AAU7-01A	1	IM_TypeA	LIHC
TCGA-KR-A7K0-01A	2	IM_TypeB	LIHC
TCGA-KR-A7K2-01A	3	IM_TypeB	LIHC
TCGA-KR-A7K7-01A	1	IM_TypeA	LIHC
TCGA-KR-A7K8-01A	3	IM_TypeB	LIHC
TCGA-LG-A6GG-01A	2	IM_TypeA	LIHC
TCGA-LG-A9QC-01A	3	IM_TypeB	LIHC
TCGA-LG-A9QD-01A	3	IM_TypeB	LIHC
TCGA-MI-A75C-01A	1	IM_TypeA	LIHC
TCGA-MI-A75E-01A	3	IM_TypeB	LIHC
TCGA-MI-A75G-01A	2	IM_TypeB	LIHC
TCGA-MI-A75H-01A	3	IM_TypeB	LIHC
TCGA-MI-A75I-01A	1	IM_TypeA	LIHC
TCGA-MR-A520-01A	2	IM_TypeB	LIHC
TCGA-MR-A8JO-01A	3	IM_TypeB	LIHC
TCGA-NI-A4U2-01A	3	IM_TypeB	LIHC
TCGA-NI-A8LF-01A	2	IM_TypeB	LIHC
TCGA-O8-A75V-01A	1	IM_TypeA	LIHC
TCGA-PD-A5DF-01A	1	IM_TypeA	LIHC
TCGA-QA-A7B7-01A	2	IM_TypeB	LIHC
TCGA-RC-A6M3-01A	2	IM_TypeA	LIHC
TCGA-RC-A6M4-01A	1	IM_TypeB	LIHC
TCGA-RC-A6M5-01A	2	IM_TypeB	LIHC
TCGA-RC-A6M6-01A	1	IM_TypeA	LIHC
TCGA-RC-A7S9-01A	2	IM_TypeA	LIHC
TCGA-RC-A7SB-01A	2	IM_TypeB	LIHC
TCGA-RC-A7SF-01A	1	IM_TypeB	LIHC
TCGA-RC-A7SH-01A	1	IM_TypeA	LIHC
TCGA-RC-A7SK-01A	2	IM_TypeB	LIHC
TCGA-RG-A7D4-01A	1	IM_TypeA	LIHC
TCGA-T1-A6J8-01A	2	IM_TypeB	LIHC
TCGA-UB-A7MA-01A	2	IM_TypeA	LIHC
TCGA-UB-A7MB-01A	3	IM_TypeB	LIHC
TCGA-UB-A7MC-01A	2	IM_TypeB	LIHC
TCGA-UB-A7MD-01A	2	IM_TypeB	LIHC
TCGA-UB-A7ME-01A	1	IM_TypeA	LIHC
TCGA-UB-A7MF-01A	2	IM_TypeA	LIHC
TCGA-UB-AA0U-01A	2	IM_TypeB	LIHC
TCGA-UB-AA0V-01A	2	IM_TypeB	LIHC
TCGA-WJ-A86L-01A	1	IM_TypeA	LIHC
TCGA-WQ-A9G7-01A	2	IM_TypeA	LIHC
TCGA-WQ-AB4B-01A	3	IM_TypeB	LIHC
TCGA-WX-AA44-01A	2	IM_TypeA	LIHC
TCGA-WX-AA46-01A	2	IM_TypeB	LIHC
TCGA-WX-AA47-01A	1	IM_TypeA	LIHC
TCGA-XR-A8TC-01A	3	IM_TypeB	LIHC
TCGA-XR-A8TD-01A	1	IM_TypeA	LIHC
TCGA-XR-A8TE-01A	3	IM_TypeB	LIHC
TCGA-XR-A8TF-01A	2	IM_TypeB	LIHC
TCGA-XR-A8TG-01A	3	IM_TypeB	LIHC
TCGA-YA-A8S7-01A	2	IM_TypeA	LIHC
TCGA-ZP-A9CV-01A	3	IM_TypeB	LIHC
TCGA-ZP-A9CY-01A	2	IM_TypeB	LIHC
TCGA-ZP-A9CZ-01A	2	IM_TypeB	LIHC
TCGA-ZP-A9D0-01A	2	IM_TypeB	LIHC
TCGA-ZP-A9D1-01A	3	IM_TypeB	LIHC
TCGA-ZP-A9D2-01A	1	IM_TypeA	LIHC
TCGA-ZP-A9D4-01A	3	IM_TypeB	LIHC
TCGA-ZS-A9CD-01A	2	IM_TypeB	LIHC
TCGA-ZS-A9CE-01A	2	IM_TypeB	LIHC
TCGA-ZS-A9CF-01A	3	IM_TypeB	LIHC
TCGA-ZS-A9CF-02A	3	IM_TypeB	LIHC
TCGA-ZS-A9CG-01A	3	IM_TypeB	LIHC
DO228883	3	IM_TypeB	LICA-FR
DO228887	3	IM_TypeA	LICA-FR
DO228893	3	IM_TypeA	LICA-FR
DO228894	2	IM_TypeB	LICA-FR
DO228897	2	IM_TypeB	LICA-FR
DO228898	2	IM_TypeB	LICA-FR
DO228901	1	IM_TypeA	LICA-FR
DO228904	2	IM_TypeB	LICA-FR
DO228906	2	IM_TypeB	LICA-FR
DO228907	3	IM_TypeB	LICA-FR
DO231795	3	IM_TypeB	LICA-FR
DO231806	3	IM_TypeB	LICA-FR
DO231817	3	IM_TypeB	LICA-FR
DO231820	1	IM_TypeA	LICA-FR
DO231823	1	IM_TypeA	LICA-FR
DO231825	2	IM_TypeA	LICA-FR
DO231828	3	IM_TypeB	LICA-FR
DO231831	3	IM_TypeB	LICA-FR
DO231834	2	IM_TypeA	LICA-FR
DO231838	2	IM_TypeB	LICA-FR
DO231840	3	IM_TypeB	LICA-FR
DO231842	3	IM_TypeA	LICA-FR
DO231846	3	IM_TypeB	LICA-FR
DO231849	3	IM_TypeB	LICA-FR
DO231864	2	IM_TypeA	LICA-FR
DO231867	1	IM_TypeA	LICA-FR
DO231870	1	IM_TypeA	LICA-FR
DO231873	3	IM_TypeB	LICA-FR
DO231877	1	IM_TypeA	LICA-FR
DO231878	2	IM_TypeB	LICA-FR
DO231882	1	IM_TypeB	LICA-FR
DO231884	3	IM_TypeB	LICA-FR
DO231886	3	IM_TypeB	LICA-FR
DO231889	1	IM_TypeB	LICA-FR
DO231891	2	IM_TypeA	LICA-FR
DO231894	1	IM_TypeA	LICA-FR
DO231898	2	IM_TypeB	LICA-FR
DO231901	2	IM_TypeA	LICA-FR
DO231903	1	IM_TypeA	LICA-FR
DO231905	1	IM_TypeA	LICA-FR
DO231907	3	IM_TypeA	LICA-FR
DO231908	1	IM_TypeA	LICA-FR
DO231911	1	IM_TypeA	LICA-FR
DO231912	3	IM_TypeB	LICA-FR
DO231913	2	IM_TypeB	LICA-FR
DO231915	3	IM_TypeB	LICA-FR
DO231916	3	IM_TypeB	LICA-FR
DO231917	2	IM_TypeB	LICA-FR
DO231918	2	IM_TypeB	LICA-FR
DO231919	2	IM_TypeA	LICA-FR
DO231920	3	IM_TypeB	LICA-FR
DO231921	2	IM_TypeB	LICA-FR
DO231922	1	IM_TypeA	LICA-FR
DO231923	2	IM_TypeB	LICA-FR
DO231924	2	IM_TypeA	LICA-FR
DO231925	1	IM_TypeA	LICA-FR
DO231926	1	IM_TypeB	LICA-FR
DO231927	1	IM_TypeB	LICA-FR
DO231928	1	IM_TypeB	LICA-FR
DO231929	3	IM_TypeB	LICA-FR
DO231930	1	IM_TypeB	LICA-FR
DO231931	3	IM_TypeB	LICA-FR
DO231932	3	IM_TypeB	LICA-FR
DO44634	1	IM_TypeA	LICA-FR
DO44652	3	IM_TypeB	LICA-FR
DO44666	1	IM_TypeB	LICA-FR
DO44668	1	IM_TypeA	LICA-FR
DO44672	1	IM_TypeB	LICA-FR
DO44674	3	IM_TypeA	LICA-FR
DO44676	1	IM_TypeA	LICA-FR
DO44680	2	IM_TypeB	LICA-FR
DO44696	3	IM_TypeB	LICA-FR
DO44708	3	IM_TypeB	LICA-FR
DO44714	2	IM_TypeB	LICA-FR
DO44740	1	IM_TypeA	LICA-FR
DO44754	1	IM_TypeA	LICA-FR
DO44780	1	IM_TypeA	LICA-FR
DO44788	3	IM_TypeB	LICA-FR
DO44792	2	IM_TypeA	LICA-FR
DO44794	2	IM_TypeB	LICA-FR
DO44798	3	IM_TypeB	LICA-FR
DO44800	2	IM_TypeB	LICA-FR
DO44802	2	IM_TypeB	LICA-FR
DO44806	2	IM_TypeB	LICA-FR
DO44808	3	IM_TypeB	LICA-FR
DO44812	3	IM_TypeB	LICA-FR
DO44828	3	IM_TypeB	LICA-FR
DO44832	3	IM_TypeB	LICA-FR
DO44846	1	IM_TypeB	LICA-FR
DO44848	1	IM_TypeB	LICA-FR
DO44854	2	IM_TypeA	LICA-FR
DO44856	2	IM_TypeA	LICA-FR
DO44862	1	IM_TypeA	LICA-FR
DO44864	1	IM_TypeA	LICA-FR
DO44868	2	IM_TypeB	LICA-FR
DO50743	2	IM_TypeB	LICA-FR
DO50746	3	IM_TypeB	LICA-FR
DO50748	2	IM_TypeB	LICA-FR
DO50810	3	IM_TypeB	LICA-FR
DO50826	3	IM_TypeB	LICA-FR
DO50828	1	IM_TypeB	LICA-FR
DO50835	1	IM_TypeA	LICA-FR
DO50838	1	IM_TypeB	LICA-FR
DO50847	3	IM_TypeB	LICA-FR
DO50852	1	IM_TypeA	LICA-FR
DO50853	2	IM_TypeB	LICA-FR
DO50854	1	IM_TypeA	LICA-FR
DO50858	1	IM_TypeA	LICA-FR
DO50860	3	IM_TypeB	LICA-FR
DO50861	3	IM_TypeB	LICA-FR
DO50865	1	IM_TypeB	LICA-FR
DO50867	3	IM_TypeB	LICA-FR
DO50869	3	IM_TypeB	LICA-FR
DO50874	1	IM_TypeB	LICA-FR
DO50875	1	IM_TypeB	LICA-FR
DO50879	3	IM_TypeB	LICA-FR
DO50880	3	IM_TypeB	LICA-FR
DO50881	1	IM_TypeA	LICA-FR
DO50883	2	IM_TypeA	LICA-FR
DO50885	1	IM_TypeA	LICA-FR
DO50886	2	IM_TypeB	LICA-FR
DO50889	3	IM_TypeA	LICA-FR
DO50893	1	IM_TypeA	LICA-FR
DO50894	3	IM_TypeB	LICA-FR
DO50898	3	IM_TypeB	LICA-FR
DO50899	3	IM_TypeB	LICA-FR
DO50900	3	IM_TypeB	LICA-FR
DO50902	1	IM_TypeA	LICA-FR
DO50903	1	IM_TypeA	LICA-FR
DO50905	3	IM_TypeB	LICA-FR
DO50906	2	IM_TypeB	LICA-FR
DO50907	1	IM_TypeA	LICA-FR
DO50909	3	IM_TypeB	LICA-FR
DO50910	3	IM_TypeB	LICA-FR
DO50911	2	IM_TypeB	LICA-FR
DO50912	1	IM_TypeB	LICA-FR
DO50913	1	IM_TypeA	LICA-FR
DO50916	3	IM_TypeB	LICA-FR
DO50917	3	IM_TypeA	LICA-FR
DO50919	1	IM_TypeB	LICA-FR
DO50920	2	IM_TypeB	LICA-FR
DO50921	2	IM_TypeB	LICA-FR
DO50926	3	IM_TypeB	LICA-FR
DO50927	3	IM_TypeB	LICA-FR
DO50931	1	IM_TypeB	LICA-FR
DO50933	2	IM_TypeB	LICA-FR
DO50934	2	IM_TypeB	LICA-FR
DO50935	2	IM_TypeB	LICA-FR
DO50936	1	IM_TypeA	LICA-FR
DO50938	2	IM_TypeB	LICA-FR
DO50940	3	IM_TypeB	LICA-FR
DO50944	1	IM_TypeB	LICA-FR
DO50946	2	IM_TypeB	LICA-FR
DO50954	2	IM_TypeB	LICA-FR
DO50960	1	IM_TypeA	LICA-FR
DO50962	2	IM_TypeB	LICA-FR
DO50968	2	IM_TypeA	LICA-FR
DO50969	1	IM_TypeB	LICA-FR
DO50970	3	IM_TypeB	LICA-FR
DO50972	1	IM_TypeB	LICA-FR
DO50974	2	IM_TypeB	LICA-FR
GSM1559606	3	IM_TypeB	GSE63898
GSM1559608	2	IM_TypeB	GSE63898
GSM1559609	1	IM_TypeA	GSE63898
GSM1559611	3	IM_TypeB	GSE63898
GSM1559613	3	IM_TypeB	GSE63898
GSM1559615	1	IM_TypeB	GSE63898
GSM1559617	1	IM_TypeB	GSE63898
GSM1559619	3	IM_TypeA	GSE63898
GSM1559621	3	IM_TypeB	GSE63898
GSM1559623	3	IM_TypeB	GSE63898
GSM1559625	2	IM_TypeB	GSE63898
GSM1559627	3	IM_TypeB	GSE63898
GSM1559629	2	IM_TypeA	GSE63898
GSM1559631	2	IM_TypeB	GSE63898
GSM1559633	2	IM_TypeB	GSE63898
GSM1559634	3	IM_TypeB	GSE63898
GSM1559636	1	IM_TypeA	GSE63898
GSM1559638	2	IM_TypeB	GSE63898
GSM1559640	2	IM_TypeB	GSE63898
GSM1559642	3	IM_TypeB	GSE63898
GSM1559644	3	IM_TypeB	GSE63898
GSM1559646	1	IM_TypeA	GSE63898
GSM1559648	3	IM_TypeB	GSE63898
GSM1559650	3	IM_TypeB	GSE63898
GSM1559652	1	IM_TypeB	GSE63898
GSM1559654	3	IM_TypeB	GSE63898
GSM1559656	2	IM_TypeA	GSE63898
GSM1559658	2	IM_TypeA	GSE63898
GSM1559660	3	IM_TypeB	GSE63898
GSM1559662	1	IM_TypeA	GSE63898
GSM1559664	2	IM_TypeA	GSE63898
GSM1559665	3	IM_TypeB	GSE63898
GSM1559667	3	IM_TypeB	GSE63898
GSM1559669	1	IM_TypeA	GSE63898
GSM1559671	2	IM_TypeA	GSE63898
GSM1559673	3	IM_TypeB	GSE63898
GSM1559675	3	IM_TypeB	GSE63898
GSM1559677	3	IM_TypeB	GSE63898
GSM1559679	2	IM_TypeB	GSE63898
GSM1559681	3	IM_TypeB	GSE63898
GSM1559683	3	IM_TypeB	GSE63898
GSM1559685	3	IM_TypeB	GSE63898
GSM1559687	2	IM_TypeB	GSE63898
GSM1559689	3	IM_TypeB	GSE63898
GSM1559690	3	IM_TypeB	GSE63898
GSM1559692	2	IM_TypeB	GSE63898
GSM1559693	3	IM_TypeB	GSE63898
GSM1559695	2	IM_TypeB	GSE63898
GSM1559696	2	IM_TypeB	GSE63898
GSM1559697	3	IM_TypeB	GSE63898
GSM1559699	1	IM_TypeB	GSE63898
GSM1559701	1	IM_TypeA	GSE63898
GSM1559703	3	IM_TypeB	GSE63898
GSM1559705	1	IM_TypeA	GSE63898
GSM1559707	1	IM_TypeA	GSE63898
GSM1559708	3	IM_TypeB	GSE63898
GSM1559710	2	IM_TypeA	GSE63898
GSM1559712	3	IM_TypeB	GSE63898
GSM1559713	1	IM_TypeB	GSE63898
GSM1559714	1	IM_TypeA	GSE63898
GSM1559715	3	IM_TypeB	GSE63898
GSM1559717	1	IM_TypeB	GSE63898
GSM1559719	3	IM_TypeB	GSE63898
GSM1559720	2	IM_TypeA	GSE63898
GSM1559722	3	IM_TypeB	GSE63898
GSM1559724	3	IM_TypeB	GSE63898
GSM1559725	3	IM_TypeB	GSE63898
GSM1559727	3	IM_TypeB	GSE63898
GSM1559729	1	IM_TypeB	GSE63898
GSM1559730	1	IM_TypeB	GSE63898
GSM1559732	1	IM_TypeB	GSE63898
GSM1559734	3	IM_TypeB	GSE63898
GSM1559736	1	IM_TypeA	GSE63898
GSM1559738	3	IM_TypeA	GSE63898
GSM1559739	1	IM_TypeA	GSE63898
GSM1559741	1	IM_TypeB	GSE63898
GSM1559742	3	IM_TypeB	GSE63898
GSM1559744	3	IM_TypeA	GSE63898
GSM1559746	2	IM_TypeA	GSE63898
GSM1559748	1	IM_TypeB	GSE63898
GSM1559750	2	IM_TypeB	GSE63898
GSM1559752	1	IM_TypeA	GSE63898
GSM1559754	3	IM_TypeB	GSE63898
GSM1559755	3	IM_TypeB	GSE63898
GSM1559756	3	IM_TypeB	GSE63898
GSM1559758	2	IM_TypeA	GSE63898
GSM1559760	2	IM_TypeB	GSE63898
GSM1559761	1	IM_TypeA	GSE63898
GSM1559763	3	IM_TypeB	GSE63898
GSM1559764	1	IM_TypeA	GSE63898
GSM1559766	3	IM_TypeA	GSE63898
GSM1559768	1	IM_TypeB	GSE63898
GSM1559770	3	IM_TypeB	GSE63898
GSM1559772	1	IM_TypeA	GSE63898
GSM1559774	3	IM_TypeB	GSE63898
GSM1559775	1	IM_TypeA	GSE63898
GSM1559777	1	IM_TypeA	GSE63898
GSM1559779	1	IM_TypeA	GSE63898
GSM1559781	1	IM_TypeA	GSE63898
GSM1559784	3	IM_TypeA	GSE63898
GSM1559785	1	IM_TypeA	GSE63898
GSM1559787	3	IM_TypeB	GSE63898
GSM1559788	1	IM_TypeA	GSE63898
GSM1559790	1	IM_TypeA	GSE63898
GSM1559792	1	IM_TypeA	GSE63898
GSM1559794	1	IM_TypeA	GSE63898
GSM1559796	3	IM_TypeB	GSE63898
GSM1559798	3	IM_TypeB	GSE63898
GSM1559799	3	IM_TypeB	GSE63898
GSM1559800	2	IM_TypeB	GSE63898
GSM1559802	3	IM_TypeB	GSE63898
GSM1559803	3	IM_TypeB	GSE63898
GSM1559805	1	IM_TypeA	GSE63898
GSM1559807	1	IM_TypeB	GSE63898
GSM1559809	3	IM_TypeB	GSE63898
GSM1559811	1	IM_TypeB	GSE63898
GSM1559812	1	IM_TypeB	GSE63898
GSM1559813	1	IM_TypeA	GSE63898
GSM1559814	1	IM_TypeA	GSE63898
GSM1559815	3	IM_TypeB	GSE63898
GSM1559817	3	IM_TypeB	GSE63898
GSM1559819	3	IM_TypeB	GSE63898
GSM1559821	1	IM_TypeB	GSE63898
GSM1559823	2	IM_TypeA	GSE63898
GSM1559825	1	IM_TypeA	GSE63898
GSM1559827	2	IM_TypeB	GSE63898
GSM1559829	2	IM_TypeB	GSE63898
GSM1559831	3	IM_TypeB	GSE63898
GSM1559833	2	IM_TypeB	GSE63898
GSM1559835	1	IM_TypeB	GSE63898
GSM1559837	3	IM_TypeB	GSE63898
GSM1559838	2	IM_TypeA	GSE63898
GSM1559840	3	IM_TypeB	GSE63898
GSM1559842	1	IM_TypeB	GSE63898
GSM1559843	3	IM_TypeB	GSE63898
GSM1559845	2	IM_TypeB	GSE63898
GSM1559846	3	IM_TypeB	GSE63898
GSM1559847	3	IM_TypeB	GSE63898
GSM1559848	1	IM_TypeB	GSE63898
GSM1559849	1	IM_TypeB	GSE63898
GSM1559850	1	IM_TypeA	GSE63898
GSM1559852	2	IM_TypeB	GSE63898
GSM1559854	3	IM_TypeA	GSE63898
GSM1559856	3	IM_TypeB	GSE63898
GSM1559858	1	IM_TypeA	GSE63898
GSM1559860	3	IM_TypeB	GSE63898
GSM1559862	1	IM_TypeA	GSE63898
GSM1559864	3	IM_TypeB	GSE63898
GSM1559866	2	IM_TypeB	GSE63898
GSM1559868	3	IM_TypeB	GSE63898
GSM1559870	1	IM_TypeA	GSE63898
GSM1559872	3	IM_TypeB	GSE63898
GSM1559873	2	IM_TypeB	GSE63898
GSM1559874	1	IM_TypeB	GSE63898
GSM1559876	3	IM_TypeB	GSE63898
GSM1559877	3	IM_TypeB	GSE63898
GSM1559879	2	IM_TypeB	GSE63898
GSM1559880	3	IM_TypeB	GSE63898
GSM1559882	3	IM_TypeB	GSE63898
GSM1559884	3	IM_TypeB	GSE63898
GSM1559885	2	IM_TypeB	GSE63898
GSM1559886	3	IM_TypeB	GSE63898
GSM1559887	1	IM_TypeB	GSE63898
GSM1559889	1	IM_TypeB	GSE63898
GSM1559890	2	IM_TypeB	GSE63898
GSM1559892	2	IM_TypeA	GSE63898
GSM1559893	1	IM_TypeA	GSE63898
GSM1559895	3	IM_TypeB	GSE63898
GSM1559897	3	IM_TypeA	GSE63898
GSM1559899	3	IM_TypeA	GSE63898
GSM1559901	2	IM_TypeB	GSE63898
GSM1559903	2	IM_TypeB	GSE63898
GSM1559905	2	IM_TypeA	GSE63898
GSM1559907	1	IM_TypeB	GSE63898
GSM1559908	2	IM_TypeA	GSE63898
GSM1559910	3	IM_TypeB	GSE63898
GSM1559912	1	IM_TypeB	GSE63898
GSM1559914	1	IM_TypeB	GSE63898
GSM1559915	3	IM_TypeA	GSE63898
GSM1559917	2	IM_TypeA	GSE63898
GSM1559919	3	IM_TypeB	GSE63898
GSM1559920	3	IM_TypeB	GSE63898
GSM1559922	2	IM_TypeB	GSE63898
GSM1559924	3	IM_TypeB	GSE63898
GSM1559925	1	IM_TypeA	GSE63898
GSM1559927	1	IM_TypeB	GSE63898
GSM1559928	3	IM_TypeB	GSE63898
GSM1559930	1	IM_TypeA	GSE63898
GSM1559932	2	IM_TypeB	GSE63898
GSM1559934	2	IM_TypeB	GSE63898
GSM1559936	1	IM_TypeB	GSE63898
GSM1559938	3	IM_TypeB	GSE63898
GSM1559939	3	IM_TypeB	GSE63898
GSM1559940	2	IM_TypeA	GSE63898
GSM1559942	2	IM_TypeA	GSE63898
GSM1559944	3	IM_TypeB	GSE63898
GSM1559945	1	IM_TypeA	GSE63898
GSM1559947	1	IM_TypeA	GSE63898
GSM1559948	1	IM_TypeA	GSE63898
GSM1559950	1	IM_TypeA	GSE63898
GSM1559952	1	IM_TypeA	GSE63898
GSM1559954	1	IM_TypeB	GSE63898
GSM1559955	2	IM_TypeB	GSE63898
GSM1559957	3	IM_TypeB	GSE63898
GSM1559958	1	IM_TypeA	GSE63898
GSM1559959	1	IM_TypeA	GSE63898
GSM1559961	1	IM_TypeA	GSE63898
GSM1559962	1	IM_TypeA	GSE63898
GSM1559964	1	IM_TypeA	GSE63898
GSM1559966	3	IM_TypeB	GSE63898
GSM1559968	3	IM_TypeB	GSE63898
GSM1559970	3	IM_TypeB	GSE63898
GSM1559972	3	IM_TypeB	GSE63898
GSM1559973	2	IM_TypeA	GSE63898
GSM1559975	1	IM_TypeA	GSE63898
GSM1559977	1	IM_TypeB	GSE63898
GSM1559979	3	IM_TypeB	GSE63898
GSM1559980	3	IM_TypeA	GSE63898
GSM1559982	3	IM_TypeA	GSE63898
GSM1559984	1	IM_TypeA	GSE63898
GSM1559986	3	IM_TypeB	GSE63898
GSM1559988	3	IM_TypeB	GSE63898
GSM1559990	3	IM_TypeB	GSE63898
GSM1559992	2	IM_TypeB	GSE63898
GSM1559994	3	IM_TypeB	GSE63898
GSM1559996	2	IM_TypeB	GSE63898
GSM1559998	3	IM_TypeB	GSE63898
GSM1559999	2	IM_TypeB	GSE63898
GSM1979367	1	IM_TypeA	GSE76297
GSM1979369	3	IM_TypeB	GSE76297
GSM1979371	3	IM_TypeB	GSE76297
GSM1979373	1	IM_TypeB	GSE76297
GSM1979375	1	IM_TypeA	GSE76297
GSM1979377	2	IM_TypeB	GSE76297
GSM1979379	3	IM_TypeB	GSE76297
GSM1979381	1	IM_TypeA	GSE76297
GSM1979383	2	IM_TypeA	GSE76297
GSM1979385	1	IM_TypeA	GSE76297
GSM1979387	1	IM_TypeA	GSE76297
GSM1979389	3	IM_TypeA	GSE76297
GSM1979391	1	IM_TypeA	GSE76297
GSM1979393	3	IM_TypeA	GSE76297
GSM1979395	3	IM_TypeB	GSE76297
GSM1979397	1	IM_TypeA	GSE76297
GSM1979399	1	IM_TypeB	GSE76297
GSM1979401	1	IM_TypeB	GSE76297
GSM1979403	2	IM_TypeB	GSE76297
GSM1979405	1	IM_TypeA	GSE76297
GSM1979407	1	IM_TypeA	GSE76297
GSM1979408	2	IM_TypeB	GSE76297
GSM1979410	3	IM_TypeB	GSE76297
GSM1979412	3	IM_TypeB	GSE76297
GSM1979414	1	IM_TypeA	GSE76297
GSM1979416	2	IM_TypeA	GSE76297
GSM1979418	3	IM_TypeB	GSE76297
GSM1979420	1	IM_TypeB	GSE76297
GSM1979421	3	IM_TypeB	GSE76297
GSM1979423	2	IM_TypeA	GSE76297
GSM1979425	3	IM_TypeB	GSE76297
GSM1979427	3	IM_TypeB	GSE76297
GSM1979429	2	IM_TypeA	GSE76297
GSM1979431	1	IM_TypeA	GSE76297
GSM1979433	1	IM_TypeB	GSE76297
GSM1979435	3	IM_TypeB	GSE76297
GSM1979437	1	IM_TypeA	GSE76297
GSM1979439	1	IM_TypeA	GSE76297
GSM1979441	1	IM_TypeA	GSE76297
GSM1979443	3	IM_TypeB	GSE76297
GSM1979445	2	IM_TypeB	GSE76297
GSM1979447	3	IM_TypeB	GSE76297
GSM1979449	3	IM_TypeB	GSE76297
GSM1979451	3	IM_TypeB	GSE76297
GSM1979453	2	IM_TypeB	GSE76297
GSM1979455	3	IM_TypeB	GSE76297
GSM1979457	2	IM_TypeB	GSE76297
GSM1979459	3	IM_TypeB	GSE76297
GSM1979461	2	IM_TypeB	GSE76297
GSM1979463	3	IM_TypeB	GSE76297
GSM1979465	1	IM_TypeA	GSE76297
GSM1979467	2	IM_TypeB	GSE76297
GSM1979469	3	IM_TypeB	GSE76297
GSM1979471	3	IM_TypeB	GSE76297
GSM1979473	3	IM_TypeB	GSE76297
GSM1979475	3	IM_TypeB	GSE76297
GSM1979477	2	IM_TypeB	GSE76297
GSM1979479	3	IM_TypeB	GSE76297
GSM1979481	2	IM_TypeB	GSE76297
GSM1979483	1	IM_TypeA	GSE76297
GSM1979485	1	IM_TypeA	GSE76297
GSM1979511	2	IM_TypeA	GSE76297
GSM2011285	3	IM_TypeB	GSE76427
GSM2011286	3	IM_TypeB	GSE76427
GSM2011287	2	IM_TypeB	GSE76427
GSM2011288	2	IM_TypeA	GSE76427
GSM2011289	1	IM_TypeB	GSE76427
GSM2011290	1	IM_TypeB	GSE76427
GSM2011291	1	IM_TypeA	GSE76427
GSM2011292	1	IM_TypeB	GSE76427
GSM2011293	3	IM_TypeB	GSE76427
GSM2011294	3	IM_TypeB	GSE76427
GSM2011295	2	IM_TypeB	GSE76427
GSM2011296	1	IM_TypeA	GSE76427
GSM2011297	3	IM_TypeB	GSE76427
GSM2011298	1	IM_TypeA	GSE76427
GSM2011299	2	IM_TypeB	GSE76427
GSM2011300	3	IM_TypeB	GSE76427
GSM2011301	2	IM_TypeB	GSE76427
GSM2011302	1	IM_TypeA	GSE76427
GSM2011303	2	IM_TypeB	GSE76427
GSM2011304	1	IM_TypeB	GSE76427
GSM2011305	1	IM_TypeA	GSE76427
GSM2011306	3	IM_TypeB	GSE76427
GSM2011307	2	IM_TypeB	GSE76427
GSM2011308	3	IM_TypeB	GSE76427
GSM2011309	3	IM_TypeB	GSE76427
GSM2011310	3	IM_TypeB	GSE76427
GSM2011311	3	IM_TypeB	GSE76427
GSM2011312	2	IM_TypeB	GSE76427
GSM2011313	1	IM_TypeA	GSE76427
GSM2011314	3	IM_TypeA	GSE76427
GSM2011315	3	IM_TypeA	GSE76427
GSM2011316	3	IM_TypeB	GSE76427
GSM2011317	1	IM_TypeA	GSE76427
GSM2011318	2	IM_TypeA	GSE76427
GSM2011319	2	IM_TypeB	GSE76427
GSM2011320	1	IM_TypeA	GSE76427
GSM2011321	1	IM_TypeA	GSE76427
GSM2011322	1	IM_TypeA	GSE76427
GSM2011323	3	IM_TypeB	GSE76427
GSM2011324	2	IM_TypeA	GSE76427
GSM2011325	1	IM_TypeA	GSE76427
GSM2011326	3	IM_TypeB	GSE76427
GSM2011327	2	IM_TypeB	GSE76427
GSM2011328	2	IM_TypeB	GSE76427
GSM2011329	2	IM_TypeB	GSE76427
GSM2011330	3	IM_TypeA	GSE76427
GSM2011331	1	IM_TypeB	GSE76427
GSM2011332	2	IM_TypeB	GSE76427
GSM2011333	3	IM_TypeB	GSE76427
GSM2011334	3	IM_TypeB	GSE76427
GSM2011335	1	IM_TypeB	GSE76427
GSM2011336	3	IM_TypeB	GSE76427
GSM2011337	3	IM_TypeB	GSE76427
GSM2011338	3	IM_TypeB	GSE76427
GSM2011339	3	IM_TypeB	GSE76427
GSM2011340	3	IM_TypeB	GSE76427
GSM2011341	1	IM_TypeB	GSE76427
GSM2011342	1	IM_TypeA	GSE76427
GSM2011343	2	IM_TypeB	GSE76427
GSM2011344	1	IM_TypeA	GSE76427
GSM2011345	3	IM_TypeB	GSE76427
GSM2011346	1	IM_TypeA	GSE76427
GSM2011347	3	IM_TypeB	GSE76427
GSM2011348	1	IM_TypeB	GSE76427
GSM2011349	3	IM_TypeB	GSE76427
GSM2011350	1	IM_TypeB	GSE76427
GSM2011351	1	IM_TypeA	GSE76427
GSM2011352	1	IM_TypeB	GSE76427
GSM2011353	1	IM_TypeA	GSE76427
GSM2011354	2	IM_TypeB	GSE76427
GSM2011355	2	IM_TypeB	GSE76427
GSM2011356	3	IM_TypeA	GSE76427
GSM2011357	3	IM_TypeB	GSE76427
GSM2011358	3	IM_TypeB	GSE76427
GSM2011359	1	IM_TypeB	GSE76427
GSM2011360	1	IM_TypeA	GSE76427
GSM2011361	1	IM_TypeA	GSE76427
GSM2011362	3	IM_TypeB	GSE76427
GSM2011363	1	IM_TypeA	GSE76427
GSM2011364	2	IM_TypeA	GSE76427
GSM2011365	3	IM_TypeB	GSE76427
GSM2011366	2	IM_TypeB	GSE76427
GSM2011367	3	IM_TypeB	GSE76427
GSM2011368	3	IM_TypeB	GSE76427
GSM2011369	2	IM_TypeB	GSE76427
GSM2011370	2	IM_TypeB	GSE76427
GSM2011371	3	IM_TypeB	GSE76427
GSM2011372	3	IM_TypeB	GSE76427
GSM2011373	1	IM_TypeA	GSE76427
GSM2011374	1	IM_TypeB	GSE76427
GSM2011375	2	IM_TypeB	GSE76427
GSM2011376	3	IM_TypeB	GSE76427
GSM2011377	3	IM_TypeA	GSE76427
GSM2011378	3	IM_TypeA	GSE76427
GSM2011379	1	IM_TypeB	GSE76427
GSM2011380	1	IM_TypeA	GSE76427
GSM2011381	3	IM_TypeB	GSE76427
GSM2011382	3	IM_TypeB	GSE76427
GSM2011383	3	IM_TypeB	GSE76427
GSM2011384	2	IM_TypeB	GSE76427
GSM2011385	2	IM_TypeB	GSE76427
GSM2011386	3	IM_TypeB	GSE76427
GSM2011387	2	IM_TypeB	GSE76427
GSM2011388	3	IM_TypeB	GSE76427
GSM2011389	2	IM_TypeB	GSE76427
GSM2011390	1	IM_TypeA	GSE76427
GSM2011391	3	IM_TypeB	GSE76427
GSM2011392	1	IM_TypeA	GSE76427
GSM2011393	2	IM_TypeA	GSE76427
GSM2011394	2	IM_TypeB	GSE76427
GSM2011395	3	IM_TypeB	GSE76427
GSM2011396	3	IM_TypeB	GSE76427
GSM2011397	2	IM_TypeB	GSE76427
GSM2011398	2	IM_TypeA	GSE76427
GSM2011399	2	IM_TypeB	GSE76427
GSM2052461	2	IM_TypeB	GSE64041
GSM2052463	2	IM_TypeB	GSE64041
GSM2052465	1	IM_TypeB	GSE64041
GSM2052467	3	IM_TypeB	GSE64041
GSM2052469	1	IM_TypeA	GSE64041
GSM2052471	3	IM_TypeB	GSE64041
GSM2052473	1	IM_TypeB	GSE64041
GSM2052475	2	IM_TypeB	GSE64041
GSM2052477	2	IM_TypeB	GSE64041
GSM2052479	2	IM_TypeB	GSE64041
GSM2052481	1	IM_TypeA	GSE64041
GSM2052483	3	IM_TypeB	GSE64041
GSM2052485	2	IM_TypeB	GSE64041
GSM2052487	1	IM_TypeA	GSE64041
GSM2052489	2	IM_TypeA	GSE64041
GSM2052491	2	IM_TypeB	GSE64041
GSM2052493	1	IM_TypeB	GSE64041
GSM2052495	3	IM_TypeB	GSE64041
GSM2052497	3	IM_TypeB	GSE64041
GSM2052499	1	IM_TypeA	GSE64041
GSM2052501	3	IM_TypeB	GSE64041
GSM2052503	1	IM_TypeA	GSE64041
GSM2052505	3	IM_TypeA	GSE64041
GSM2052507	3	IM_TypeA	GSE64041
GSM2052509	1	IM_TypeA	GSE64041
GSM2052511	1	IM_TypeA	GSE64041
GSM2052513	1	IM_TypeA	GSE64041
GSM2052515	3	IM_TypeB	GSE64041
GSM2052517	2	IM_TypeB	GSE64041
GSM2052519	3	IM_TypeB	GSE64041
GSM2052521	1	IM_TypeA	GSE64041
GSM2052523	2	IM_TypeB	GSE64041
GSM2052525	2	IM_TypeB	GSE64041
GSM2052527	1	IM_TypeA	GSE64041
GSM2052529	3	IM_TypeB	GSE64041
GSM2052531	2	IM_TypeA	GSE64041
GSM2052533	2	IM_TypeB	GSE64041
GSM2052535	3	IM_TypeB	GSE64041
GSM2052537	3	IM_TypeB	GSE64041
GSM2052539	1	IM_TypeA	GSE64041
GSM2052541	2	IM_TypeB	GSE64041
GSM2052543	3	IM_TypeB	GSE64041
GSM2052545	3	IM_TypeB	GSE64041
GSM2052547	3	IM_TypeB	GSE64041
GSM2052549	3	IM_TypeB	GSE64041
GSM2052551	2	IM_TypeB	GSE64041
GSM2052553	2	IM_TypeA	GSE64041
GSM2052555	1	IM_TypeA	GSE64041
GSM2052557	3	IM_TypeB	GSE64041
GSM2052559	3	IM_TypeB	GSE64041
GSM2052561	3	IM_TypeB	GSE64041
GSM2052563	3	IM_TypeB	GSE64041
GSM2052565	2	IM_TypeB	GSE64041
GSM2052567	3	IM_TypeB	GSE64041
GSM2052569	1	IM_TypeA	GSE64041
GSM2052571	3	IM_TypeB	GSE64041
GSM2052573	3	IM_TypeB	GSE64041
GSM2052575	3	IM_TypeB	GSE64041
GSM2052577	3	IM_TypeA	GSE64041
GSM2052579	1	IM_TypeA	GSE64041

## Sheet: Table S3
Table S3. The significant amplificated regions and genes among three clusters
gene	Cytoband	fre_cluster1	fre_cluster2	fre_cluster3	pvalue	p.adj
A1CF	10q11.23	0.203883	0.131387	0.0687023	0.00926763	0.0980584
AAAS	12q13.13	0.223301	0.131387	0.0458015	0.000265989	0.0195615
AACS	12q24.31	0.184466	0.138686	0.0458015	0.00327163	0.0559441
AAR2	20q11.23	0.407767	0.328467	0.175573	0.000340755	0.0205734
ABALON	20q11.21	0.38835	0.328467	0.19084	0.00267377	0.0516176
ABCA9	17q24.2	0.504854	0.328467	0.335878	0.00890973	0.0962399
ABCB9	12q24.31	0.184466	0.145985	0.0381679	0.00125269	0.0370208
ABCC9	12p12.1	0.174757	0.124088	0.0458015	0.0062132	0.0779683
ABCD2	12q12	0.213592	0.124088	0.0381679	0.00019964	0.0190381
ABHD16B	20q13.33	0.456311	0.379562	0.259542	0.00632266	0.0779683
ABI1	10p12.1	0.281553	0.189781	0.114504	0.00521281	0.0710947
ABL2	1q25.2	0.815534	0.635036	0.770992	0.00356509	0.05948
ACACB	12q24.11	0.23301	0.153285	0.0381679	6.09384e-05	0.0162045
ACAD10	12q24.12	0.213592	0.145985	0.0458015	0.000568793	0.025985
ACADS	12q24.31	0.174757	0.138686	0.0381679	0.00233389	0.0485494
ACBD6	1q25.2	0.805825	0.635036	0.763359	0.00690405	0.0822867
ACHE	7q22.1	0.203883	0.40146	0.305344	0.00467645	0.0685815
ACOT8	20q13.12	0.417476	0.343066	0.21374	0.00293636	0.0523415
ACSS2	20q11.22	0.407767	0.321168	0.198473	0.00206209	0.0441382
ACSS3	12q21.31	0.203883	0.167883	0.0687023	0.00776457	0.0898778
ACTL6B	7q22.1	0.203883	0.40146	0.305344	0.00467645	0.0685815
ACTR5	20q11.23	0.407767	0.321168	0.221374	0.00868016	0.095494
ACTR6	12q23.1	0.213592	0.167883	0.0534351	0.00108209	0.0340454
ACVR1B	12q13.13	0.252427	0.116788	0.0458015	1.54063e-05	0.0162045
ACVRL1	12q13.13	0.252427	0.116788	0.0458015	1.54063e-05	0.0162045
ADA	20q13.12	0.417476	0.350365	0.206107	0.00156283	0.0415881
ADAM1A	12q24.12	0.213592	0.138686	0.0458015	0.00056531	0.025985
ADAMTS20	12q12	0.223301	0.124088	0.0381679	9.33257e-05	0.0162045
ADCY6	12q13.12	0.213592	0.131387	0.0610687	0.00258426	0.0514594
ADIG	20q11.23	0.407767	0.321168	0.206107	0.00342556	0.0582508
ADIPOR1	1q32.1	0.805825	0.635036	0.778626	0.00428251	0.0656131
ADIPOR2	12p13.33	0.194175	0.145985	0.0610687	0.00822398	0.0927254
ADNP	20q13.13	0.436893	0.350365	0.221374	0.00184429	0.0429139
ADNP-AS1	20q13.13	0.446602	0.350365	0.221374	0.00114422	0.0347253
ADORA1	1q32.1	0.805825	0.635036	0.778626	0.00428251	0.0656131
ADRM1	20q13.33	0.436893	0.364964	0.229008	0.00258176	0.0514594
AEBP2	12p12.3	0.165049	0.116788	0.0381679	0.00503014	0.0697314
AGFG2	7q22.1	0.203883	0.40146	0.29771	0.00435461	0.0656131
AKR1C1	10p15.1	0.291262	0.233577	0.129771	0.00854486	0.0948936
ALDH1L2	12q23.3	0.223301	0.145985	0.0534351	0.0007092	0.027297
ALDH2	12q24.12	0.213592	0.138686	0.0458015	0.00056531	0.025985
ALG10B	12q12	0.281553	0.218978	0.0763359	0.000150567	0.0170415
ALKBH2	12q24.11	0.242718	0.153285	0.0381679	3.03357e-05	0.0162045
ALKBH4	7q22.1	0.194175	0.394161	0.305344	0.00398422	0.063611
ALX1	12q21.31	0.213592	0.167883	0.0534351	0.00108209	0.0340454
AMDHD1	12q23.1	0.213592	0.167883	0.0458015	0.000455887	0.022301
AMHR2	12q13.13	0.23301	0.131387	0.0458015	0.000126613	0.0165415
AMIGO2	12q13.11	0.213592	0.131387	0.0381679	0.000218585	0.0190381
AMN1	12p11.21	0.203883	0.124088	0.0381679	0.000410674	0.0215889
ANAPC5	12q24.31	0.194175	0.138686	0.0458015	0.00190482	0.0429139
ANAPC7	12q24.11	0.223301	0.138686	0.0381679	0.000114708	0.0162045
ANGPTL1	1q25.2	0.815534	0.642336	0.770992	0.0056264	0.0727849
ANHX	12q24.33	0.194175	0.153285	0.0534351	0.00362153	0.0597344
ANKLE2	12q24.33	0.194175	0.145985	0.0534351	0.00397602	0.063611
ANKRD13A	12q24.11	0.213592	0.138686	0.0610687	0.00276026	0.0516176
ANKRD26	10p12.1	0.271845	0.189781	0.114504	0.00887193	0.0962399
ANKRD33	12q13.13	0.242718	0.116788	0.0458015	3.71303e-05	0.0162045
ANKRD52	12q13.3	0.223301	0.153285	0.0534351	0.000713448	0.027297
ANKRD60	20q13.32	0.456311	0.343066	0.236641	0.0019388	0.0429139
ANKS1B	12q23.1	0.262136	0.20438	0.0839695	0.00113794	0.0347253
ANO4	12q23.1	0.213592	0.167883	0.0534351	0.00108209	0.0340454
ANO6	12q12	0.223301	0.116788	0.0381679	7.81733e-05	0.0162045
ANP32D	12q13.11	0.213592	0.124088	0.0381679	0.00019964	0.0190381
AP1S1	7q22.1	0.194175	0.408759	0.29771	0.00166154	0.0421451
AP4M1	7q22.1	0.203883	0.394161	0.312977	0.00706422	0.0831718
APAF1	12q23.1	0.213592	0.167883	0.0458015	0.000455887	0.022301
APBB1IP	10p12.1	0.281553	0.19708	0.114504	0.00539723	0.0719849
APCDD1L	20q13.32	0.456311	0.357664	0.236641	0.00184893	0.0429139
APCDD1L-AS1	20q13.32	0.456311	0.357664	0.236641	0.00184893	0.0429139
APOBEC4	1q25.3	0.825243	0.635036	0.778626	0.00174611	0.0421451
APOF	12q13.3	0.23301	0.153285	0.0305344	2.1721e-05	0.0162045
APOLD1	12p13.1	0.15534	0.10219	0.0381679	0.00899397	0.0962399
APPL2	12q23.3	0.223301	0.145985	0.0534351	0.0007092	0.027297
AQP2	12q13.12	0.223301	0.116788	0.0381679	7.81733e-05	0.0162045
AQP5	12q13.12	0.223301	0.116788	0.0381679	7.81733e-05	0.0162045
AQP6	12q13.12	0.223301	0.116788	0.0381679	7.81733e-05	0.0162045
ARF3	12q13.12	0.213592	0.131387	0.0687023	0.00509008	0.0697314
ARFGAP1	20q13.33	0.436893	0.350365	0.236641	0.00487932	0.0692106
ARFGEF1	8q13.2	0.660194	0.481752	0.458015	0.00424735	0.0656131
ARFGEF2	20q13.13	0.417476	0.335766	0.21374	0.00317607	0.055354
ARFRP1	20q13.33	0.456311	0.386861	0.267176	0.00906442	0.096576
ARHGAP21	10p12.1	0.281553	0.19708	0.114504	0.00539723	0.0719849
ARHGAP40	20q11.23	0.407767	0.321168	0.21374	0.00553006	0.0719849
ARHGAP9	12q13.3	0.223301	0.153285	0.0763359	0.00634998	0.0779683
ARHGDIB	12p12.3	0.15534	0.109489	0.0381679	0.00900593	0.0962399
ARID2	12q12	0.213592	0.124088	0.0305344	7.48854e-05	0.0162045
ARL1	12q23.2	0.213592	0.167883	0.0381679	0.000178673	0.0180578
ARL6IP4	12q24.31	0.194175	0.138686	0.0381679	0.000799171	0.0291965
ARL8A	1q32.1	0.796117	0.635036	0.770992	0.00818812	0.0927254
ARMC3	10p12.2	0.271845	0.20438	0.114504	0.00881805	0.0962399
ARMC4P1	10p12.1	0.271845	0.189781	0.114504	0.00887193	0.0962399
ARNTL2	12p11.23	0.203883	0.116788	0.0534351	0.00193764	0.0429139
ARNTL2-AS1	12p11.23	0.194175	0.109489	0.0534351	0.0033344	0.0568812
ARPC1A	7q22.1	0.194175	0.394161	0.305344	0.00398422	0.063611
ARPC1B	7q22.1	0.194175	0.394161	0.305344	0.00398422	0.063611
ARPC3	12q24.11	0.223301	0.138686	0.0381679	0.000114708	0.0162045
ARPC5	1q25.3	0.825243	0.635036	0.778626	0.00174611	0.0421451
ASAH2B	10q11.23	0.213592	0.131387	0.0687023	0.00509008	0.0697314
ASB8	12q13.11	0.213592	0.131387	0.0305344	8.17077e-05	0.0162045
ASCL1	12q23.2	0.223301	0.145985	0.0534351	0.0007092	0.027297
ASCL4	12q23.3	0.223301	0.138686	0.0381679	0.000114708	0.0162045
ASCL5	1q32.1	0.796117	0.635036	0.770992	0.00818812	0.0927254
ASIC1	12q13.12	0.223301	0.116788	0.0381679	7.81733e-05	0.0162045
ASIP	20q11.22	0.38835	0.343066	0.21374	0.00941244	0.0991987
ASUN	12p11.23	0.194175	0.10219	0.0458015	0.0013148	0.0381448
ASXL1	20q11.21	0.378641	0.328467	0.183206	0.00230916	0.0484555
ATF1	12q13.12	0.252427	0.116788	0.0610687	8.65335e-05	0.0162045
ATF7	12q13.13	0.252427	0.131387	0.0458015	2.57577e-05	0.0162045
ATF7IP	12p13.1	0.15534	0.10219	0.0381679	0.00899397	0.0962399
ATG101	12q13.13	0.23301	0.116788	0.0458015	8.65524e-05	0.0162045
ATP23	12q14.1	0.223301	0.153285	0.0610687	0.00157804	0.0415881
ATP2A2	12q24.11	0.223301	0.145985	0.0381679	0.000118739	0.0162045
ATP2B1	12q21.33	0.213592	0.145985	0.0534351	0.00131401	0.0381448
ATP5B	12q13.3	0.223301	0.145985	0.0381679	0.000118739	0.0162045
ATP5C1	10p14	0.281553	0.182482	0.122137	0.00811811	0.0927254
ATP5E	20q13.32	0.456311	0.364964	0.236641	0.00175064	0.0421451
ATP5G2	12q13.13	0.252427	0.138686	0.0458015	3.09594e-05	0.0162045
ATP5J2	7q22.1	0.203883	0.394161	0.305344	0.00683044	0.0819424
ATP5J2-PTCD1	7q22.1	0.203883	0.394161	0.305344	0.00683044	0.0819424
ATP6V0A2	12q24.31	0.194175	0.131387	0.0458015	0.00194641	0.043038
ATP6V1G3	1q31.3	0.834951	0.664234	0.770992	0.00811206	0.0927254
ATP9A	20q13.2	0.446602	0.357664	0.221374	0.00106949	0.0340454
ATXN2	12q24.12	0.213592	0.138686	0.0458015	0.00056531	0.025985
ATXN7L3B	12q21.1	0.23301	0.160584	0.0610687	0.000866655	0.0291965
AURKA	20q13.2	0.436893	0.357664	0.221374	0.00169994	0.0421451
AVIL	12q14.1	0.23301	0.153285	0.0763359	0.00360103	0.059718
AVPR1A	12q14.2	0.223301	0.160584	0.0381679	0.00011224	0.0162045
AXDND1	1q25.2	0.815534	0.635036	0.770992	0.00356509	0.05948
AZGP1	7q22.1	0.203883	0.40146	0.312977	0.00490347	0.0692106
AZGP1P1	7q22.1	0.203883	0.40146	0.312977	0.00490347	0.0692106
B3GALT2	1q31.2	0.825243	0.642336	0.778626	0.00283552	0.0516176
B3GNT4	12q24.31	0.174757	0.145985	0.0458015	0.00467338	0.0685815
B4GALT5	20q13.13	0.436893	0.357664	0.229008	0.0028303	0.0516176
BAZ2A	12q13.3	0.223301	0.145985	0.0381679	0.000118739	0.0162045
BBS10	12q21.2	0.223301	0.145985	0.0610687	0.00155504	0.0415881
BCAS1	20q13.2	0.456311	0.357664	0.236641	0.00184893	0.0429139
BCAS4	20q13.13	0.436893	0.343066	0.221374	0.00195995	0.0432036
BCAT1	12p12.1	0.203883	0.116788	0.0305344	0.000142356	0.0170415
BCDIN3D	12q13.12	0.223301	0.109489	0.0381679	6.20773e-05	0.0162045
BCDIN3D-AS1	12q13.12	0.223301	0.109489	0.0381679	6.20773e-05	0.0162045
BCL2L1	20q11.21	0.398058	0.328467	0.198473	0.00298702	0.0527845
BEND7	10p13	0.291262	0.189781	0.122137	0.00506537	0.0697314
BEST3	12q15	0.23301	0.167883	0.0534351	0.000366659	0.0205734
BHLHE23	20q13.33	0.427184	0.357664	0.236641	0.0069285	0.0823807
BHLHE41	12p12.1	0.194175	0.10219	0.0305344	0.000225355	0.0190381
BICD1	12p11.21	0.213592	0.116788	0.0458015	0.000422854	0.0220978
BICDL1	12q24.23	0.213592	0.138686	0.0458015	0.00056531	0.025985
BIN2	12q13.13	0.252427	0.116788	0.0458015	1.54063e-05	0.0162045
BIRC7	20q13.33	0.436893	0.350365	0.236641	0.00487932	0.0692106
BLCAP	20q11.23	0.407767	0.328467	0.198473	0.0019209	0.0429139
BLOC1S1	12q13.2	0.213592	0.167883	0.0534351	0.00108209	0.0340454
BLOC1S1-RDH5	12q13.2	0.213592	0.167883	0.0534351	0.00108209	0.0340454
BMP7	20q13.31	0.456311	0.343066	0.221374	0.000713272	0.027297
BMP7-AS1	20q13.31	0.456311	0.343066	0.221374	0.000713272	0.027297
BMS1	10q11.21	0.213592	0.124088	0.0763359	0.00823995	0.0927254
BORCS5	12p13.2	0.165049	0.109489	0.0381679	0.00506834	0.0697314
BPI	20q11.23	0.407767	0.321168	0.198473	0.00206209	0.0441382
BPIFA1	20q11.21	0.38835	0.321168	0.198473	0.00499034	0.0693855
BPIFA2	20q11.21	0.38835	0.321168	0.198473	0.00499034	0.0693855
BPIFA3	20q11.21	0.38835	0.321168	0.198473	0.00499034	0.0693855
BPIFA4P	20q11.21	0.38835	0.321168	0.198473	0.00499034	0.0693855
BPIFB1	20q11.21	0.38835	0.321168	0.206107	0.00809116	0.0927254
BPIFB2	20q11.21	0.38835	0.321168	0.198473	0.00499034	0.0693855
BPIFB3	20q11.21	0.38835	0.321168	0.198473	0.00499034	0.0693855
BPIFB4	20q11.21	0.38835	0.321168	0.198473	0.00499034	0.0693855
BPIFB6	20q11.21	0.38835	0.321168	0.198473	0.00499034	0.0693855
BRAP	12q24.12	0.213592	0.138686	0.0458015	0.00056531	0.025985
BRI3BP	12q24.31	0.184466	0.138686	0.0458015	0.00327163	0.0559441
BRINP3	1q31.1	0.815534	0.642336	0.770992	0.0056264	0.0727849
BTBD11	12q23.3	0.223301	0.138686	0.0458015	0.000289403	0.0195615
BTG1	12q21.33	0.23301	0.153285	0.0458015	0.000158277	0.0170415
BUD31	7q22.1	0.194175	0.394161	0.305344	0.00398422	0.063611
C10orf10	10q11.21	0.203883	0.131387	0.0687023	0.00926763	0.0980584
C10orf113	10p12.31	0.281553	0.19708	0.122137	0.00917869	0.0975993
C10orf142	10q11.21	0.213592	0.131387	0.0687023	0.00509008	0.0697314
C10orf25	10q11.21	0.203883	0.131387	0.0687023	0.00926763	0.0980584
C10orf67	10p12.2	0.271845	0.20438	0.114504	0.00881805	0.0962399
C12orf10	12q13.13	0.223301	0.131387	0.0458015	0.000265989	0.0195615
C12orf29	12q21.32	0.223301	0.153285	0.0610687	0.00157804	0.0415881
C12orf40	12q12	0.213592	0.124088	0.0381679	0.00019964	0.0190381
C12orf42	12q23.2	0.223301	0.145985	0.0687023	0.00318803	0.055354
C12orf43	12q24.31	0.194175	0.138686	0.0458015	0.00190482	0.0429139
C12orf45	12q23.3	0.223301	0.145985	0.0534351	0.0007092	0.027297
C12orf49	12q24.22	0.223301	0.131387	0.0534351	0.000617787	0.0272526
C12orf50	12q21.32	0.223301	0.160584	0.0610687	0.00154039	0.0415881
C12orf54	12q13.11	0.213592	0.124088	0.0381679	0.00019964	0.0190381
C12orf56	12q14.2	0.203883	0.160584	0.0381679	0.000346444	0.0205734
C12orf65	12q24.31	0.194175	0.131387	0.0381679	0.000823478	0.0291965
C12orf66	12q14.2	0.203883	0.160584	0.0381679	0.000346444	0.0205734
C12orf71	12p11.23	0.194175	0.109489	0.0305344	0.000266774	0.0195615
C12orf73	12q23.3	0.223301	0.145985	0.0534351	0.0007092	0.027297
C12orf74	12q22	0.223301	0.160584	0.0458015	0.000288593	0.0195615
C12orf75	12q23.3	0.223301	0.145985	0.0534351	0.0007092	0.027297
C12orf76	12q24.11	0.213592	0.138686	0.0610687	0.00276026	0.0516176
C12orf77	12p12.1	0.194175	0.109489	0.0305344	0.000266774	0.0195615
C12orf80	12q13.13	0.223301	0.116788	0.0534351	0.000447867	0.022301
C1orf106	1q32.1	0.796117	0.635036	0.770992	0.00818812	0.0927254
C1orf21	1q25.3	0.825243	0.627737	0.778626	0.00105633	0.0340454
C1orf220	1q25.2	0.815534	0.649635	0.770992	0.0087192	0.0958039
C1orf27	1q31.1	0.805825	0.635036	0.770992	0.0055155	0.0719849
C1QL4	12q13.12	0.213592	0.109489	0.0458015	0.000347398	0.0205734
C20orf166-AS1	20q13.33	0.436893	0.364964	0.229008	0.00258176	0.0514594
C20orf173	20q11.22	0.407767	0.328467	0.19084	0.00111195	0.0342584
C20orf197	20q13.33	0.456311	0.350365	0.221374	0.000690241	0.027297
C20orf203	20q11.21	0.378641	0.321168	0.19084	0.00450241	0.0673664
C20orf24	20q11.23	0.417476	0.328467	0.183206	0.000381237	0.0205734
C20orf85	20q13.32	0.456311	0.343066	0.236641	0.0019388	0.0429139
C2CD5	12p12.1	0.174757	0.109489	0.0458015	0.00598364	0.0760412
C7orf43	7q22.1	0.203883	0.394161	0.305344	0.00683044	0.0819424
C7orf61	7q22.1	0.203883	0.40146	0.29771	0.00435461	0.0656131
CABLES2	20q13.33	0.436893	0.364964	0.229008	0.00258176	0.0514594
CABP1	12q24.31	0.174757	0.138686	0.0381679	0.00233389	0.0485494
CACNA1C	12p13.33	0.165049	0.138686	0.0458015	0.00834554	0.0933255
CACNA1C-AS1	12p13.33	0.174757	0.124088	0.0458015	0.0062132	0.0779683
CACNA1C-AS2	12p13.33	0.174757	0.124088	0.0458015	0.0062132	0.0779683
CACNA1C-AS4	12p13.33	0.184466	0.124088	0.0458015	0.00351733	0.0592938
CACNA1C-IT3	12p13.33	0.184466	0.124088	0.0458015	0.00351733	0.0592938
CACNA1E	1q25.3	0.815534	0.627737	0.763359	0.00279311	0.0516176
CACNA1S	1q32.1	0.796117	0.635036	0.770992	0.00818812	0.0927254
CACNA2D4	12p13.33	0.184466	0.131387	0.0534351	0.00740703	0.0864867
CACNB3	12q13.12	0.213592	0.131387	0.0610687	0.00258426	0.0514594
CALCOCO1	12q13.13	0.252427	0.138686	0.0458015	3.09594e-05	0.0162045
CALML5	10p15.1	0.291262	0.19708	0.129771	0.00897998	0.0962399
CAMK1D	10p13	0.291262	0.189781	0.122137	0.00506537	0.0697314
CAMKK2	12q24.31	0.194175	0.138686	0.0610687	0.00857909	0.0948936
CAMSAP2	1q32.1	0.815534	0.635036	0.770992	0.00356509	0.05948
CAND1	12q14.3	0.203883	0.160584	0.0610687	0.00430061	0.0656131
CAPRIN2	12p11.21	0.194175	0.116788	0.0381679	0.00076022	0.0284763
CAPS2	12q21.1	0.23301	0.160584	0.0610687	0.000866655	0.0291965
CASC1	12p12.1	0.194175	0.10219	0.0305344	0.000225355	0.0190381
CASC18	12q23.3	0.223301	0.145985	0.0534351	0.0007092	0.027297
CASS4	20q13.31	0.436893	0.357664	0.221374	0.00169994	0.0421451
CBLN4	20q13.2	0.446602	0.357664	0.221374	0.00106949	0.0340454
CBX5	12q13.13	0.223301	0.145985	0.0534351	0.0007092	0.027297
CCDC184	12q13.11	0.213592	0.131387	0.0305344	8.17077e-05	0.0162045
CCDC3	10p13	0.291262	0.189781	0.129771	0.00830488	0.0929193
CCDC38	12q23.1	0.223301	0.167883	0.0458015	0.000266608	0.0195615
CCDC53	12q23.2	0.213592	0.153285	0.0381679	0.000218726	0.0190381
CCDC59	12q21.31	0.213592	0.160584	0.0687023	0.00539849	0.0719849
CCDC60	12q24.23	0.203883	0.145985	0.0458015	0.00103025	0.0338043
CCDC62	12q24.31	0.174757	0.145985	0.0458015	0.00467338	0.0685815
CCDC63	12q24.11	0.213592	0.131387	0.0458015	0.00053787	0.0257817
CCDC65	12q13.12	0.213592	0.131387	0.0687023	0.00509008	0.0697314
CCDC91	12p11.22	0.194175	0.109489	0.0458015	0.00156785	0.0415881
CCDC92	12q24.31	0.184466	0.138686	0.0381679	0.00139869	0.0396933
CCER1	12q21.33	0.23301	0.167883	0.0534351	0.000366659	0.0205734
CCM2L	20q11.21	0.378641	0.335766	0.183206	0.00197083	0.0433987
CCND2	12p13.32	0.174757	0.109489	0.0458015	0.00598364	0.0760412
CCNT1	12q13.11	0.213592	0.116788	0.0534351	0.00094976	0.0314522
CCT2	12q15	0.23301	0.167883	0.0534351	0.000366659	0.0205734
CD40	20q13.12	0.417476	0.343066	0.21374	0.00293636	0.0523415
CD63	12q13.2	0.213592	0.167883	0.0534351	0.00108209	0.0340454
CD69	12p13.31	0.165049	0.10219	0.0381679	0.00484298	0.0692106
CDC123	10p14	0.291262	0.182482	0.114504	0.00270759	0.0516176
CDC73	1q31.2	0.825243	0.642336	0.778626	0.00283552	0.0516176
CDH22	20q13.12	0.417476	0.343066	0.221374	0.00481002	0.0692106
CDH26	20q13.33	0.456311	0.350365	0.221374	0.000690241	0.027297
CDH4	20q13.33	0.456311	0.372263	0.244275	0.00267812	0.0516176
CDK17	12q23.1	0.213592	0.167883	0.0381679	0.000178673	0.0180578
CDK18	1q32.1	0.815534	0.635036	0.755725	0.00533345	0.0719849
CDK2	12q13.2	0.23301	0.160584	0.0610687	0.000866655	0.0291965
CDK2AP1	12q24.31	0.194175	0.131387	0.0381679	0.000823478	0.0291965
CDK5RAP1	20q11.21	0.38835	0.321168	0.206107	0.00809116	0.0927254
CDKN1B	12p13.1	0.15534	0.10219	0.0381679	0.00899397	0.0962399
CEBPB	20q13.13	0.436893	0.357664	0.229008	0.0028303	0.0516176
CEBPB-AS1	20q13.13	0.436893	0.357664	0.229008	0.0028303	0.0516176
CELA1	12q13.13	0.252427	0.116788	0.0458015	1.54063e-05	0.0162045
CEP250	20q11.22	0.407767	0.328467	0.19084	0.00111195	0.0342584
CEP290	12q21.32	0.223301	0.153285	0.0610687	0.00157804	0.0415881
CEP350	1q25.2	0.815534	0.635036	0.770992	0.00356509	0.05948
CEP83	12q22	0.203883	0.160584	0.0458015	0.000862856	0.0291965
CEP83-AS1	12q22	0.203883	0.160584	0.0458015	0.000862856	0.0291965
CEP89	19q13.11	0.330097	0.189781	0.175573	0.00923906	0.0980584
CERS5	12q13.12	0.223301	0.109489	0.0381679	6.20773e-05	0.0162045
CFAP54	12q23.1	0.242718	0.167883	0.0458015	8.0705e-05	0.0162045
CFAP73	12q24.13	0.223301	0.131387	0.0458015	0.000265989	0.0195615
CFHR2	1q31.3	0.834951	0.664234	0.78626	0.00567037	0.0727849
CFHR5	1q31.3	0.834951	0.664234	0.778626	0.00688292	0.0822495
CGA	6q14.3	0.213592	0.10219	0.0839695	0.0069603	0.0826671
CHD6	20q12	0.417476	0.350365	0.21374	0.00265882	0.0516176
CHFR	12q24.33	0.194175	0.153285	0.0534351	0.00362153	0.0597344
CHI3L1	1q32.1	0.805825	0.635036	0.778626	0.00428251	0.0656131
CHIT1	1q32.1	0.805825	0.635036	0.778626	0.00428251	0.0656131
CHPT1	12q23.2	0.213592	0.160584	0.0381679	0.000201454	0.0190381
CHRNA4	20q13.33	0.436893	0.350365	0.236641	0.00487932	0.0692106
CHST11	12q23.3	0.223301	0.160584	0.0534351	0.000690084	0.027297
CISTR	12q13.13	0.242718	0.138686	0.0458015	6.76142e-05	0.0162045
CIT	12q24.23	0.203883	0.138686	0.0458015	0.00106015	0.0340454
CKAP4	12q23.3	0.23301	0.145985	0.0687023	0.00172034	0.0421451
CLDN15	7q22.1	0.194175	0.408759	0.29771	0.00166154	0.0421451
CLEC12A	12p13.31	0.165049	0.10219	0.0381679	0.00484298	0.0692106
CLEC12B	12p13.2	0.165049	0.10219	0.0381679	0.00484298	0.0692106
CLEC1A	12p13.2	0.165049	0.10219	0.0381679	0.00484298	0.0692106
CLEC1B	12p13.31	0.165049	0.10219	0.0381679	0.00484298	0.0692106
CLEC2A	12p13.31	0.165049	0.10219	0.0381679	0.00484298	0.0692106
CLEC2B	12p13.31	0.165049	0.10219	0.0381679	0.00484298	0.0692106
CLEC2D	12p13.31	0.165049	0.10219	0.0381679	0.00484298	0.0692106
CLEC7A	12p13.2	0.165049	0.10219	0.0381679	0.00484298	0.0692106
CLEC9A	12p13.2	0.165049	0.10219	0.0381679	0.00484298	0.0692106
CLECL1	12p13.31	0.165049	0.10219	0.0381679	0.00484298	0.0692106
CLLU1	12q22	0.223301	0.167883	0.0458015	0.000266608	0.0195615
CLLU1OS	12q22	0.223301	0.167883	0.0458015	0.000266608	0.0195615
CLVS1	8q12.2	0.631068	0.452555	0.427481	0.00408353	0.065148
CMAS	12p12.1	0.174757	0.124088	0.0381679	0.00276487	0.0516176
CMKLR1	12q23.3	0.223301	0.145985	0.0381679	0.000118739	0.0162045
CNBD2	20q11.23	0.407767	0.321168	0.175573	0.00037678	0.0205734
CNOT2	12q15	0.213592	0.160584	0.0534351	0.00119859	0.0356801
CNPY2	12q13.3	0.23301	0.153285	0.0458015	0.000158277	0.0170415
CNPY4	7q22.1	0.203883	0.394161	0.305344	0.00683044	0.0819424
CNTN1	12q12	0.213592	0.124088	0.0305344	7.48854e-05	0.0162045
COL20A1	20q13.33	0.436893	0.350365	0.236641	0.00487932	0.0692106
COL26A1	7q22.1	0.223301	0.408759	0.305344	0.00864005	0.0953744
COL2A1	12q13.11	0.223301	0.131387	0.0381679	0.000105951	0.0162045
COL9A3	20q13.33	0.427184	0.357664	0.229008	0.00432295	0.0656131
COLGALT2	1q25.3	0.815534	0.635036	0.778626	0.00279312	0.0516176
COMMD7	20q11.21	0.378641	0.321168	0.198473	0.00742683	0.0866538
COPS5	8q13.1	0.660194	0.481752	0.458015	0.00424735	0.0656131
COPS6	7q22.1	0.203883	0.394161	0.312977	0.00706422	0.0831718
COPZ1	12q13.13	0.213592	0.153285	0.0610687	0.00277833	0.0516176
COQ10A	12q13.3	0.223301	0.153285	0.0534351	0.000713448	0.027297
COQ5	12q24.31	0.174757	0.138686	0.0458015	0.00535827	0.0719849
CORO1C	12q24.11	0.23301	0.145985	0.0458015	0.0001534	0.0170415
COX14	12q13.12	0.223301	0.109489	0.0381679	6.20773e-05	0.0162045
COX4I2	20q11.21	0.398058	0.328467	0.198473	0.00298702	0.0527845
COX6A1	12q24.31	0.174757	0.138686	0.0458015	0.00535827	0.0719849
CPM	12q15	0.23301	0.175182	0.0839695	0.00673454	0.0819424
CPNE1	20q11.22	0.407767	0.321168	0.175573	0.00037678	0.0205734
CPNE8	12q12	0.242718	0.19708	0.0763359	0.0016047	0.0421451
CPSF4	7q22.1	0.203883	0.394161	0.305344	0.00683044	0.0819424
CPSF6	12q15	0.23301	0.167883	0.0610687	0.000840217	0.0291965
CRADD	12q22	0.203883	0.167883	0.0534351	0.00174453	0.0421451
CRAT8	12q24.32	0.194175	0.131387	0.0534351	0.00424534	0.0656131
CREBL2	12p13.1	0.15534	0.109489	0.0381679	0.00900593	0.0962399
CRY1	12q23.3	0.223301	0.138686	0.0458015	0.000289403	0.0195615
CS	12q13.3	0.23301	0.160584	0.0534351	0.000381489	0.0205734
CSAD	12q13.13	0.223301	0.131387	0.0381679	0.000105951	0.0162045
CSE1L	20q13.13	0.417476	0.335766	0.21374	0.00317607	0.055354
CSE1L-AS1	20q13.13	0.417476	0.335766	0.21374	0.00317607	0.055354
CSGALNACT2	10q11.21	0.223301	0.138686	0.0763359	0.00569004	0.0727849
CSPP1	8q13.1	0.660194	0.481752	0.458015	0.00424735	0.0656131
CSRNP2	12q13.12	0.252427	0.116788	0.0534351	3.78932e-05	0.0162045
CSRP1	1q32.1	0.796117	0.635036	0.770992	0.00818812	0.0927254
CSRP2	12q21.2	0.223301	0.145985	0.0610687	0.00155504	0.0415881
CSTF1	20q13.2	0.436893	0.357664	0.221374	0.00169994	0.0421451
CTCFL	20q13.31	0.466019	0.350365	0.236641	0.00114875	0.0348133
CTDSP2	12q14.1	0.23301	0.153285	0.0763359	0.00360103	0.059718
CTNNBL1	20q11.23	0.407767	0.321168	0.21374	0.00553006	0.0719849
CTSA	20q13.12	0.417476	0.343066	0.21374	0.00293636	0.0523415
CTSZ	20q13.32	0.456311	0.364964	0.236641	0.00175064	0.0421451
CUX1	7q22.1	0.194175	0.40146	0.305344	0.0026967	0.0516176
CUX2	12q24.11	0.213592	0.131387	0.0381679	0.000218585	0.0190381
CXCL12	10q11.21	0.223301	0.131387	0.0687023	0.00268489	0.0516176
CYB5R1	1q32.1	0.805825	0.635036	0.778626	0.00428251	0.0656131
CYP24A1	20q13.2	0.446602	0.372263	0.236641	0.00252585	0.0512004
CYP3A43	7q22.1	0.213592	0.408759	0.320611	0.00597122	0.0760412
CYP3A5	7q22.1	0.203883	0.40146	0.305344	0.00467645	0.0685815
DAO	12q24.11	0.23301	0.145985	0.0534351	0.000367925	0.0205734
DAZAP2	12q13.13	0.252427	0.116788	0.0458015	1.54063e-05	0.0162045
DBNDD2	20q13.12	0.417476	0.343066	0.206107	0.0017435	0.0421451
DBX2	12q12	0.223301	0.116788	0.0381679	7.81733e-05	0.0162045
DCD	12q13.2	0.213592	0.160584	0.0534351	0.00119859	0.0356801
DCN	12q21.33	0.23301	0.167883	0.0534351	0.000366659	0.0205734
DCTN2	12q13.3	0.223301	0.160584	0.0763359	0.00632971	0.0779683
DDIT3	12q13.3	0.223301	0.160584	0.0763359	0.00632971	0.0779683
DDN	12q13.12	0.213592	0.124088	0.0687023	0.00451508	0.0674147
DDX11	12p11.21	0.194175	0.116788	0.0458015	0.00177104	0.0423507
DDX11-AS1	12p11.21	0.194175	0.116788	0.0381679	0.00076022	0.0284763
DDX23	12q13.12	0.213592	0.131387	0.0687023	0.00509008	0.0697314
DDX27	20q13.13	0.417476	0.343066	0.221374	0.00481002	0.0692106
DDX47	12p13.1	0.15534	0.10219	0.0381679	0.00899397	0.0962399
DDX51	12q24.33	0.194175	0.145985	0.0610687	0.00822398	0.0927254
DDX54	12q24.13	0.223301	0.131387	0.0458015	0.000265989	0.0195615
DDX55	12q24.31	0.194175	0.131387	0.0381679	0.000823478	0.0291965
DDX59	1q32.1	0.815534	0.635036	0.770992	0.00356509	0.05948
DEFB115	20q11.21	0.407767	0.335766	0.221374	0.0078389	0.0906891
DEFB116	20q11.21	0.407767	0.328467	0.21374	0.00525703	0.0714249
DEFB118	20q11.21	0.407767	0.335766	0.21374	0.00489218	0.0692106
DEFB119	20q11.21	0.407767	0.335766	0.21374	0.00489218	0.0692106
DEFB121	20q11.21	0.417476	0.335766	0.21374	0.00317607	0.055354
DEFB122	20q11.21	0.417476	0.335766	0.21374	0.00317607	0.055354
DEFB123	20q11.21	0.417476	0.335766	0.21374	0.00317607	0.055354
DEFB124	20q11.21	0.417476	0.343066	0.21374	0.00293636	0.0523415
DEFB130	8p23.1	0.135922	0.233577	0.0916031	0.00478515	0.0692106
DENND5B	12p11.21	0.203883	0.116788	0.0381679	0.000370555	0.0205734
DENND5B-AS1	12p11.21	0.203883	0.116788	0.0381679	0.000370555	0.0205734
DENR	12q24.31	0.174757	0.138686	0.0458015	0.00535827	0.0719849
DEPDC4	12q23.1	0.213592	0.167883	0.0534351	0.00108209	0.0340454
DGKA	12q13.2	0.223301	0.175182	0.0687023	0.00280969	0.0516176
DHH	12q13.12	0.213592	0.116788	0.0534351	0.00094976	0.0314522
DHTKD1	10p14	0.291262	0.182482	0.122137	0.00458716	0.0679933
DHX35	20q11.23	0.417476	0.321168	0.221374	0.00554079	0.0720807
DHX37	12q24.31	0.184466	0.138686	0.0458015	0.00327163	0.0559441
DHX9	1q25.3	0.815534	0.635036	0.778626	0.00279312	0.0516176
DIABLO	12q24.31	0.174757	0.153285	0.0458015	0.0039215	0.063611
DIDO1	20q13.33	0.427184	0.364964	0.229008	0.00388925	0.063611
DIP2B	12q13.12	0.242718	0.116788	0.0534351	8.93153e-05	0.0162045
DLGAP4	20q11.23	0.417476	0.328467	0.183206	0.000381237	0.0205734
DLGAP4-AS1	20q11.23	0.417476	0.328467	0.183206	0.000381237	0.0205734
DNAH10	12q24.31	0.194175	0.138686	0.0381679	0.000799171	0.0291965
DNAJC14	12q13.2	0.213592	0.167883	0.0610687	0.00239834	0.049127
DNAJC22	12q13.12	0.213592	0.109489	0.0458015	0.000347398	0.0205734
DNAJC5	20q13.33	0.456311	0.379562	0.259542	0.00632266	0.0779683
DNM1L	12p11.21	0.213592	0.124088	0.0458015	0.000488699	0.0237974
DNMT3B	20q11.21	0.38835	0.321168	0.198473	0.00499034	0.0693855
DNTTIP1	20q13.12	0.417476	0.343066	0.21374	0.00293636	0.0523415
DOK5	20q13.2	0.446602	0.372263	0.229008	0.00150962	0.0415881
DPH3P1	20q13.33	0.427184	0.357664	0.229008	0.00432295	0.0656131
DPM1	20q13.13	0.446602	0.350365	0.221374	0.00114422	0.0347253
DPPA2	3q13.13	0.213592	0.124088	0.0687023	0.00451508	0.0674147
DPPA4	3q13.13	0.203883	0.124088	0.0687023	0.00849107	0.0945908
DPY19L2	12q14.2	0.23301	0.182482	0.0687023	0.00155803	0.0415881
DRAM1	12q23.2	0.213592	0.153285	0.0381679	0.000218726	0.0190381
DSN1	20q11.23	0.407767	0.328467	0.198473	0.0019209	0.0429139
DTX1	12q24.13	0.223301	0.131387	0.0458015	0.000265989	0.0195615
DUSP15	20q11.21	0.38835	0.328467	0.183206	0.00153853	0.0415881
DUSP16	12p13.2	0.15534	0.116788	0.0381679	0.00856006	0.0948936
DUSP6	12q21.33	0.223301	0.153285	0.0610687	0.00157804	0.0415881
DYNLL1	12q24.31	0.174757	0.138686	0.0458015	0.00535827	0.0719849
DYNLRB1	20q11.22	0.38835	0.321168	0.206107	0.00809116	0.0927254
DYRK2	12q15	0.203883	0.160584	0.0610687	0.00430061	0.0656131
E2F7	12q21.2	0.23301	0.145985	0.0610687	0.000822549	0.0291965
EDEM2	20q11.22	0.417476	0.321168	0.183206	0.000411102	0.0215889
EDEM3	1q25.3	0.825243	0.635036	0.778626	0.00174611	0.0421451
EDN3	20q13.32	0.456311	0.350365	0.221374	0.000690241	0.027297
EEA1	12q22	0.23301	0.160584	0.0534351	0.000381489	0.0205734
EEF1A2	20q13.33	0.436893	0.357664	0.236641	0.00458874	0.0679933
EID3	12q23.3	0.223301	0.153285	0.0534351	0.000713448	0.027297
EIF2B1	12q24.31	0.194175	0.138686	0.0458015	0.00190482	0.0429139
EIF2S2	20q11.22	0.38835	0.328467	0.206107	0.00739016	0.0864867
EIF4B	12q13.13	0.23301	0.131387	0.0534351	0.00030023	0.0195615
EIF6	20q11.22	0.398058	0.321168	0.183206	0.00110652	0.0342584
ELF3	1q32.1	0.796117	0.635036	0.778626	0.0062993	0.0779683
ELK3	12q23.1	0.213592	0.167883	0.0381679	0.000178673	0.0180578
ELK4	1q32.1	0.805825	0.642336	0.770992	0.00858764	0.0948936
ELMO2	20q13.12	0.417476	0.343066	0.221374	0.00481002	0.0692106
EMILIN3	20q12	0.427184	0.350365	0.206107	0.00100297	0.0329595
EMP1	12p13.1	0.15534	0.10219	0.0381679	0.00899397	0.0962399
ENDOU	12q13.11	0.223301	0.131387	0.0381679	0.000105951	0.0162045
EP400	12q24.33	0.194175	0.153285	0.0610687	0.00757977	0.0878811
EP400NL	12q24.33	0.194175	0.153285	0.0610687	0.00757977	0.0878811
EPB41L1	20q11.23	0.407767	0.328467	0.175573	0.000340755	0.0205734
EPHB4	7q22.1	0.203883	0.40146	0.312977	0.00490347	0.0692106
EPO	7q22.1	0.194175	0.40146	0.312977	0.00280129	0.0516176
EPPIN	20q13.12	0.417476	0.343066	0.206107	0.0017435	0.0421451
EPPIN-WFDC6	20q13.12	0.417476	0.343066	0.206107	0.0017435	0.0421451
EPYC	12q21.33	0.23301	0.167883	0.0534351	0.000366659	0.0205734
ERBB3	12q13.2	0.223301	0.160584	0.0687023	0.003221	0.0556521
ERGIC2	12p11.22	0.194175	0.116788	0.0458015	0.00177104	0.0423507
ERGIC3	20q11.22	0.407767	0.328467	0.19084	0.00111195	0.0342584
ERP27	12p12.3	0.15534	0.109489	0.0381679	0.00900593	0.0962399
ERP29	12q24.13	0.213592	0.138686	0.0458015	0.00056531	0.025985
ESPL1	12q13.13	0.223301	0.131387	0.0458015	0.000265989	0.0195615
ESYT1	12q13.2	0.223301	0.160584	0.0687023	0.003221	0.0556521
ETFBKMT	12p11.21	0.203883	0.124088	0.0381679	0.000410674	0.0215889
ETFRF1	12p12.1	0.194175	0.10219	0.0305344	0.000225355	0.0190381
ETNK1	12p12.1	0.174757	0.109489	0.0458015	0.00598364	0.0760412
EYA2	20q13.12	0.427184	0.335766	0.21374	0.0020035	0.0435808
FAIM2	12q13.12	0.223301	0.116788	0.0381679	7.81733e-05	0.0162045
FAM109A	12q24.12	0.213592	0.131387	0.0381679	0.000218585	0.0190381
FAM129A	1q25.3	0.825243	0.635036	0.778626	0.00174611	0.0421451
FAM163A	1q25.2	0.805825	0.635036	0.770992	0.0055155	0.0719849
FAM185A	7q22.1	0.203883	0.40146	0.305344	0.00467645	0.0685815
FAM186A	12q13.12	0.23301	0.116788	0.0381679	3.39687e-05	0.0162045
FAM186B	12q13.12	0.223301	0.109489	0.0381679	6.20773e-05	0.0162045
FAM19A2	12q14.1	0.23301	0.167883	0.0458015	0.000149614	0.0170415
FAM200A	7q22.1	0.203883	0.394161	0.305344	0.00683044	0.0819424
FAM209A	20q13.31	0.427184	0.357664	0.221374	0.00262642	0.0516176
FAM209B	20q13.31	0.427184	0.357664	0.221374	0.00262642	0.0516176
FAM20B	1q25.2	0.815534	0.635036	0.770992	0.00356509	0.05948
FAM210B	20q13.2	0.436893	0.357664	0.221374	0.00169994	0.0421451
FAM216A	12q24.11	0.223301	0.138686	0.0381679	0.000114708	0.0162045
FAM217B	20q13.33	0.456311	0.350365	0.221374	0.000690241	0.027297
FAM222A	12q24.11	0.213592	0.145985	0.0687023	0.00567812	0.0727849
FAM222A-AS1	12q24.11	0.213592	0.145985	0.0687023	0.00567812	0.0727849
FAM60A	12p11.21	0.213592	0.116788	0.0381679	0.000173483	0.0180439
FAM65C	20q13.13	0.436893	0.364964	0.206107	0.000500512	0.0243174
FAM71C	12q23.1	0.223301	0.160584	0.0381679	0.00011224	0.0162045
FAM83C	20q11.22	0.398058	0.321168	0.183206	0.00110652	0.0342584
FAM83C-AS1	20q11.22	0.398058	0.321168	0.183206	0.00110652	0.0342584
FAM83D	20q11.23	0.427184	0.321168	0.221374	0.003437	0.0583528
FAM90A2P	8p23.1	0.15534	0.240876	0.0992366	0.00746833	0.0870127
FAR2	12p11.22	0.194175	0.116788	0.0458015	0.00177104	0.0423507
FBRSL1	12q24.33	0.194175	0.145985	0.0534351	0.00397602	0.063611
FBXL14	12p13.33	0.194175	0.153285	0.0610687	0.00757977	0.0878811
FBXO21	12q24.22	0.223301	0.138686	0.0458015	0.000289403	0.0195615
FBXO24	7q22.1	0.203883	0.40146	0.29771	0.00435461	0.0656131
FBXW8	12q24.22	0.223301	0.145985	0.0458015	0.000301283	0.0195615
FER1L4	20q11.22	0.417476	0.328467	0.183206	0.000381237	0.0205734
FGD4	12p11.21	0.213592	0.109489	0.0458015	0.000347398	0.0205734
FGD6	12q22	0.213592	0.167883	0.0458015	0.000455887	0.022301
FGF23	12p13.32	0.174757	0.109489	0.0458015	0.00598364	0.0760412
FGF6	12p13.32	0.174757	0.109489	0.0458015	0.00598364	0.0760412
FGFR1OP2	12p11.23	0.194175	0.10219	0.0381679	0.000570403	0.0260031
FICD	12q23.3	0.223301	0.153285	0.0381679	0.000117796	0.0162045
FIGNL2	12q13.13	0.242718	0.116788	0.0458015	3.71303e-05	0.0162045
FIS1	7q22.1	0.194175	0.408759	0.29771	0.00166154	0.0421451
FKBP11	12q13.12	0.213592	0.131387	0.0687023	0.00509008	0.0697314
FKBP4	12p13.33	0.174757	0.116788	0.0458015	0.00625	0.0779683
FLJ12825	12q13.13	0.223301	0.145985	0.0458015	0.000301283	0.0195615
FLJ13224	12p11.21	0.203883	0.116788	0.0381679	0.000370555	0.0205734
FLJ16779	20q13.33	0.436893	0.350365	0.236641	0.00487932	0.0692106
FLJ22763	3q13.13	0.223301	0.131387	0.0687023	0.00268489	0.0516176
FLJ23867	1q25.2	0.815534	0.635036	0.770992	0.00356509	0.05948
FLJ37505	12q24.32	0.194175	0.131387	0.0610687	0.0085861	0.0948936
FLJ41278	12q14.3	0.203883	0.160584	0.0534351	0.00199521	0.0434445
FMNL3	12q13.12	0.223301	0.109489	0.0381679	6.20773e-05	0.0162045
FNDC11	20q13.33	0.436893	0.357664	0.236641	0.00458874	0.0679933
FOXM1	12p13.33	0.174757	0.116788	0.0458015	0.00625	0.0779683
FOXN1	17q11.2	0.349515	0.189781	0.206107	0.00867439	0.095494
FOXN4	12q24.11	0.23301	0.145985	0.0381679	5.93808e-05	0.0162045
FOXS1	20q11.21	0.38835	0.328467	0.183206	0.00153853	0.0415881
FRG1BP	20q11.1	0.398058	0.364964	0.21374	0.00421147	0.0656131
FRG1CP	20q11.1	0.378641	0.350365	0.206107	0.00687927	0.0822495
FRG1DP	20q11.1	0.378641	0.350365	0.206107	0.00687927	0.0822495
FRG2EP	20q11.1	0.378641	0.350365	0.206107	0.00687927	0.0822495
FRMD4A	10p13	0.291262	0.189781	0.122137	0.00506537	0.0697314
FRS2	12q15	0.23301	0.167883	0.0534351	0.000366659	0.0205734
FXYD4	10q11.21	0.223301	0.138686	0.0763359	0.00569004	0.0727849
GABARAPL1	12p13.2	0.165049	0.10219	0.0381679	0.00484298	0.0692106
GAD2	10p12.1	0.271845	0.19708	0.10687	0.00513637	0.0701862
GAL3ST4	7q22.1	0.203883	0.394161	0.305344	0.00683044	0.0819424
GALNT4	12q21.33	0.213592	0.153285	0.0534351	0.00127953	0.0377101
GALNT6	12q13.13	0.242718	0.116788	0.0458015	3.71303e-05	0.0162045
GALNT9	12q24.33	0.194175	0.145985	0.0610687	0.00822398	0.0927254
GAS2L3	12q23.1	0.223301	0.175182	0.0610687	0.00131565	0.0381448
GATA3	10p14	0.281553	0.182482	0.122137	0.00811811	0.0927254
GATA3-AS1	10p14	0.281553	0.182482	0.122137	0.00811811	0.0927254
GATA5	20q13.33	0.436893	0.364964	0.229008	0.00258176	0.0514594
GATC	12q24.31	0.174757	0.138686	0.0458015	0.00535827	0.0719849
GATS	7q22.1	0.203883	0.394161	0.305344	0.00683044	0.0819424
GCN1	12q24.23	0.194175	0.138686	0.0458015	0.00190482	0.0429139
GCNT7	20q13.31	0.427184	0.357664	0.221374	0.00262642	0.0516176
GDAP1L1	20q13.12	0.407767	0.343066	0.221374	0.0072175	0.0848283
GDF10	10q11.22	0.223301	0.131387	0.0839695	0.00897212	0.0962399
GDF11	12q13.2	0.213592	0.167883	0.0534351	0.00108209	0.0340454
GDF2	10q11.22	0.223301	0.131387	0.0839695	0.00897212	0.0962399
GDF5	20q11.22	0.407767	0.328467	0.19084	0.00111195	0.0342584
GGH	8q12.3	0.631068	0.467153	0.442748	0.00926593	0.0980584
GGT7	20q11.22	0.398058	0.313869	0.198473	0.00347173	0.0587395
GHRH	20q11.23	0.407767	0.328467	0.198473	0.0019209	0.0429139
GID8	20q13.33	0.427184	0.364964	0.229008	0.00388925	0.063611
GIGYF1	7q22.1	0.203883	0.40146	0.312977	0.00490347	0.0692106
GIT2	12q24.11	0.213592	0.138686	0.0610687	0.00276026	0.0516176
GJC3	7q22.1	0.203883	0.40146	0.312977	0.00490347	0.0692106
GLI1	12q13.3	0.23301	0.145985	0.0839695	0.00624316	0.0779683
GLIPR1	12q21.2	0.23301	0.160584	0.0610687	0.000866655	0.0291965
GLIPR1L1	12q21.2	0.23301	0.160584	0.0610687	0.000866655	0.0291965
GLIPR1L2	12q21.2	0.23301	0.160584	0.0610687	0.000866655	0.0291965
GLRX2	1q31.2	0.825243	0.635036	0.78626	0.00134008	0.0385402
GLS2	12q13.3	0.242718	0.145985	0.0381679	2.8595e-05	0.0162045
GLT1D1	12q24.33	0.184466	0.131387	0.0534351	0.00740703	0.0864867
GLT8D2	12q23.3	0.223301	0.153285	0.0534351	0.000713448	0.027297
GLTP	12q24.11	0.213592	0.138686	0.0610687	0.00276026	0.0516176
GLUL	1q25.3	0.815534	0.627737	0.778626	0.00171274	0.0421451
GLYCAM1	12q13.2	0.213592	0.160584	0.0534351	0.00119859	0.0356801
GM140	1q25.3	0.805825	0.627737	0.763359	0.00441881	0.0663937
GNAS	20q13.32	0.456311	0.357664	0.236641	0.00184893	0.0429139
GNAS-AS1	20q13.32	0.456311	0.357664	0.236641	0.00184893	0.0429139
GNB2	7q22.1	0.203883	0.40146	0.312977	0.00490347	0.0692106
GNPTAB	12q23.2	0.213592	0.160584	0.0381679	0.000201454	0.0190381
GNS	12q14.3	0.203883	0.160584	0.0458015	0.000862856	0.0291965
GOLGA2P5	12q23.1	0.213592	0.167883	0.0534351	0.00108209	0.0340454
GOLGA3	12q24.33	0.194175	0.145985	0.0534351	0.00397602	0.063611
GOLT1B	12p12.1	0.174757	0.116788	0.0381679	0.00280847	0.0516176
GPC2	7q22.1	0.203883	0.394161	0.305344	0.00683044	0.0819424
GPD1	12q13.12	0.223301	0.109489	0.0381679	6.20773e-05	0.0162045
GPN3	12q24.11	0.223301	0.138686	0.0381679	0.000114708	0.0162045
GPR158	10p12.1	0.281553	0.20438	0.114504	0.00541945	0.0719849
GPR158-AS1	10p12.1	0.271845	0.20438	0.114504	0.00881805	0.0962399
GPR182	12q13.3	0.213592	0.145985	0.0687023	0.00567812	0.0727849
GPR19	12p13.1	0.15534	0.10219	0.0381679	0.00899397	0.0962399
GPR25	1q32.1	0.796117	0.635036	0.770992	0.00818812	0.0927254
GPR37L1	1q32.1	0.796117	0.635036	0.770992	0.00818812	0.0927254
GPR84	12q13.13	0.213592	0.153285	0.0610687	0.00277833	0.0516176
GPRC5A	12p13.1	0.15534	0.10219	0.0381679	0.00899397	0.0962399
GPRC5D	12p13.1	0.15534	0.10219	0.0381679	0.00899397	0.0962399
GRASP	12q13.13	0.23301	0.116788	0.0458015	8.65524e-05	0.0162045
GRIN2B	12p13.1	0.15534	0.10219	0.0381679	0.00899397	0.0962399
GRIP1	12q14.3	0.203883	0.160584	0.0458015	0.000862856	0.0291965
GS1-259H13.2	7q22.1	0.203883	0.394161	0.312977	0.00706422	0.0831718
GS1-279B7.1	1q25.3	0.825243	0.635036	0.770992	0.00220928	0.0468674
GSS	20q11.22	0.407767	0.321168	0.198473	0.00206209	0.0441382
GTF2H3	12q24.31	0.194175	0.138686	0.0458015	0.00190482	0.0429139
GTSF1	12q13.13	0.213592	0.160584	0.0534351	0.00119859	0.0356801
GUCA1C	3q13.13	0.213592	0.124088	0.0763359	0.00823995	0.0927254
GXYLT1	12q12	0.223301	0.116788	0.0305344	2.87746e-05	0.0162045
GYS2	12p12.1	0.174757	0.124088	0.0381679	0.00276487	0.0516176
H1FNT	12q13.11	0.213592	0.131387	0.0305344	8.17077e-05	0.0162045
H3F3C	12p11.21	0.203883	0.124088	0.0458015	0.00098411	0.0324893
HAL	12q23.1	0.213592	0.167883	0.0458015	0.000455887	0.022301
HAR1A	20q13.33	0.446602	0.357664	0.236641	0.00295405	0.0525258
HAR1B	20q13.33	0.446602	0.357664	0.236641	0.00295405	0.0525258
HBP1	7q22.3	0.213592	0.40146	0.312977	0.00826457	0.0927589
HCAR1	12q24.31	0.174757	0.138686	0.0458015	0.00535827	0.0719849
HCAR2	12q24.31	0.174757	0.138686	0.0458015	0.00535827	0.0719849
HCAR3	12q24.31	0.174757	0.138686	0.0458015	0.00535827	0.0719849
HCFC2	12q23.3	0.223301	0.153285	0.0534351	0.000713448	0.027297
HCK	20q11.21	0.378641	0.328467	0.183206	0.00230916	0.0484555
HDAC7	12q13.11	0.223301	0.131387	0.0381679	0.000105951	0.0162045
HEBP1	12p13.1	0.15534	0.10219	0.0381679	0.00899397	0.0962399
HECTD4	12q24.13	0.223301	0.138686	0.0534351	0.000676465	0.027297
HELB	12q14.3	0.203883	0.160584	0.0458015	0.000862856	0.0291965
HELZ2	20q13.33	0.436893	0.357664	0.236641	0.00458874	0.0679933
HIGD1C	12q13.12	0.252427	0.116788	0.0610687	8.65335e-05	0.0162045
HIP1R	12q24.31	0.184466	0.145985	0.0458015	0.00296009	0.0525459
HM13	20q11.21	0.417476	0.328467	0.206107	0.00203784	0.0440554
HM13-AS1	20q11.21	0.407767	0.328467	0.206107	0.00322338	0.0556521
HMCN1	1q25.3	0.815534	0.642336	0.770992	0.0056264	0.0727849
HMGA2	12q14.3	0.203883	0.160584	0.0458015	0.000862856	0.0291965
HMGB3P1	20q11.22	0.398058	0.313869	0.198473	0.00347173	0.0587395
HNF1A	12q24.31	0.194175	0.138686	0.0458015	0.00190482	0.0429139
HNF1A-AS1	12q24.31	0.194175	0.138686	0.0458015	0.00190482	0.0429139
HNF4A-AS1	20q13.12	0.417476	0.343066	0.229008	0.00766721	0.0888468
HNRNPA1	12q13.13	0.213592	0.145985	0.0610687	0.00282568	0.0516176
HNRNPA3P1	10q11.21	0.223301	0.138686	0.0763359	0.00569004	0.0727849
HNRNPF	10q11.21	0.223301	0.138686	0.0763359	0.00569004	0.0727849
HOTAIR	12q13.13	0.23301	0.145985	0.0458015	0.0001534	0.0170415
HOXC-AS1	12q13.13	0.23301	0.145985	0.0458015	0.0001534	0.0170415
HOXC-AS2	12q13.13	0.23301	0.145985	0.0458015	0.0001534	0.0170415
HOXC-AS3	12q13.13	0.23301	0.145985	0.0458015	0.0001534	0.0170415
HOXC10	12q13.13	0.23301	0.145985	0.0458015	0.0001534	0.0170415
HOXC11	12q13.13	0.23301	0.145985	0.0458015	0.0001534	0.0170415
HOXC12	12q13.13	0.23301	0.145985	0.0458015	0.0001534	0.0170415
HOXC13	12q13.13	0.23301	0.145985	0.0458015	0.0001534	0.0170415
HOXC13-AS	12q13.13	0.23301	0.145985	0.0458015	0.0001534	0.0170415
HOXC4	12q13.13	0.23301	0.145985	0.0458015	0.0001534	0.0170415
HOXC5	12q13.13	0.23301	0.145985	0.0458015	0.0001534	0.0170415
HOXC6	12q13.13	0.23301	0.145985	0.0458015	0.0001534	0.0170415
HOXC8	12q13.13	0.23301	0.145985	0.0458015	0.0001534	0.0170415
HOXC9	12q13.13	0.23301	0.145985	0.0458015	0.0001534	0.0170415
HRH3	20q13.33	0.436893	0.364964	0.229008	0.00258176	0.0514594
HRK	12q24.22	0.223301	0.138686	0.0534351	0.000676465	0.027297
hsa-mir-1259	20q13.13	0.417476	0.343066	0.221374	0.00481002	0.0692106
hsa-mir-616	12q13.3	0.223301	0.160584	0.0763359	0.00632971	0.0779683
hsa-mir-941-1	20q13.33	0.456311	0.379562	0.259542	0.00632266	0.0779683
hsa-mir-941-2	20q13.33	0.456311	0.379562	0.259542	0.00632266	0.0779683
hsa-mir-941-3	20q13.33	0.456311	0.379562	0.259542	0.00632266	0.0779683
HSD17B6	12q13.3	0.223301	0.145985	0.0534351	0.0007092	0.027297
HSP90B1	12q23.3	0.223301	0.145985	0.0534351	0.0007092	0.027297
HSPB8	12q24.23	0.203883	0.138686	0.0381679	0.000436451	0.022301
HTR7P1	12p13.1	0.15534	0.10219	0.0381679	0.00899397	0.0962399
HVCN1	12q24.11	0.223301	0.138686	0.0458015	0.000289403	0.0195615
IAPP	12p12.1	0.174757	0.116788	0.0381679	0.00280847	0.0516176
ID1	20q11.21	0.398058	0.328467	0.198473	0.00298702	0.0527845
IER5	1q25.3	0.805825	0.627737	0.770992	0.00347897	0.0587395
IFNAR1	21q22.11	0.165049	0.0948905	0.0381679	0.0043708	0.0658108
IFNG	12q15	0.213592	0.160584	0.0610687	0.00262897	0.0516176
IFNG-AS1	12q15	0.213592	0.160584	0.0610687	0.00262897	0.0516176
IFT22	7q22.1	0.194175	0.408759	0.29771	0.00166154	0.0421451
IFT81	12q24.11	0.213592	0.145985	0.0534351	0.00131401	0.0381448
IGF1	12q23.2	0.223301	0.153285	0.0458015	0.000300792	0.0195615
IGFBP6	12q13.13	0.23301	0.153285	0.0381679	6.09384e-05	0.0162045
IGFN1	1q32.1	0.796117	0.635036	0.770992	0.00818812	0.0927254
IKBIP	12q23.1	0.213592	0.167883	0.0458015	0.000455887	0.022301
IKZF4	12q13.2	0.23301	0.160584	0.0687023	0.00184539	0.0429139
IL22	12q15	0.203883	0.160584	0.0610687	0.00430061	0.0656131
IL23A	12q13.3	0.23301	0.153285	0.0458015	0.000158277	0.0170415
IL26	12q15	0.203883	0.160584	0.0610687	0.00430061	0.0656131
INHBC	12q13.3	0.23301	0.145985	0.0839695	0.00624316	0.0779683
INHBE	12q13.3	0.23301	0.145985	0.0839695	0.00624316	0.0779683
IPO8	12p11.21	0.194175	0.116788	0.0381679	0.00076022	0.0284763
IPO9	1q32.1	0.796117	0.635036	0.778626	0.0062993	0.0779683
IPO9-AS1	1q32.1	0.796117	0.635036	0.778626	0.0062993	0.0779683
IQCD	12q24.13	0.223301	0.131387	0.0458015	0.000265989	0.0195615
IRAK3	12q14.3	0.203883	0.160584	0.0458015	0.000862856	0.0291965
IRAK4	12q12	0.223301	0.116788	0.0381679	7.81733e-05	0.0162045
ISCU	12q23.3	0.223301	0.145985	0.0381679	0.000118739	0.0162045
ITFG2	12p13.33	0.174757	0.116788	0.0458015	0.00625	0.0779683
ITGA5	12q13.13	0.213592	0.153285	0.0610687	0.00277833	0.0516176
ITGA7	12q13.2	0.213592	0.167883	0.0534351	0.00108209	0.0340454
ITGB7	12q13.13	0.223301	0.131387	0.0381679	0.000105951	0.0162045
ITIH2	10p14	0.281553	0.182482	0.122137	0.00811811	0.0927254
ITIH5	10p14	0.281553	0.182482	0.122137	0.00811811	0.0927254
ITPR2	12p11.23	0.203883	0.109489	0.0458015	0.000752775	0.0284763
IVNS1ABP	1q25.3	0.825243	0.635036	0.770992	0.00220928	0.0468674
JPH2	20q13.12	0.407767	0.343066	0.21374	0.004458	0.0667952
KANSL2	12q13.11	0.213592	0.116788	0.0534351	0.00094976	0.0314522
KCCAT198	12q23.3	0.223301	0.145985	0.0534351	0.0007092	0.027297
KCNB1	20q13.13	0.417476	0.357664	0.21374	0.00235853	0.0490145
KCNC2	12q21.1	0.23301	0.160584	0.0610687	0.000866655	0.0291965
KCNG1	20q13.13	0.446602	0.350365	0.221374	0.00114422	0.0347253
KCNH3	12q13.12	0.223301	0.109489	0.0381679	6.20773e-05	0.0162045
KCNJ8	12p12.1	0.174757	0.124088	0.0458015	0.0062132	0.0779683
KCNK15	20q13.12	0.417476	0.350365	0.206107	0.00156283	0.0415881
KCNK15-AS1	20q13.12	0.417476	0.350365	0.206107	0.00156283	0.0415881
KCNMB4	12q15	0.213592	0.160584	0.0534351	0.00119859	0.0356801
KCNQ2	20q13.33	0.436893	0.357664	0.236641	0.00458874	0.0679933
KCNS1	20q13.12	0.417476	0.343066	0.206107	0.0017435	0.0421451
KCNT2	1q31.3	0.825243	0.649635	0.78626	0.00357835	0.05948
KCTD10	12q24.11	0.23301	0.153285	0.0534351	0.000382163	0.0205734
KDM2B	12q24.31	0.194175	0.138686	0.0458015	0.00190482	0.0429139
KDM5B	1q32.1	0.805825	0.635036	0.778626	0.00428251	0.0656131
KERA	12q21.33	0.23301	0.167883	0.0534351	0.000366659	0.0205734
KIAA1033	12q23.3	0.223301	0.145985	0.0534351	0.0007092	0.027297
KIAA1551	12p11.21	0.213592	0.116788	0.0458015	0.000422854	0.0220978
KIAA1614	1q25.3	0.805825	0.627737	0.770992	0.00347897	0.0587395
KIAA1755	20q11.23	0.407767	0.321168	0.19084	0.00120566	0.0356801
KIF14	1q32.1	0.815534	0.635036	0.770992	0.00356509	0.05948
KIF16B	20p12.1	0.368932	0.328467	0.198473	0.0094038	0.0991565
KIF21A	12q12	0.213592	0.131387	0.0458015	0.00053787	0.0257817
KIF21B	1q32.1	0.796117	0.635036	0.770992	0.00818812	0.0927254
KIF3B	20q11.21	0.378641	0.328467	0.19084	0.00396602	0.063611
KIF5A	12q13.3	0.223301	0.160584	0.0763359	0.00632971	0.0779683
KIN	10p14	0.281553	0.182482	0.122137	0.00811811	0.0927254
KITLG	12q21.32	0.223301	0.153285	0.0610687	0.00157804	0.0415881
KLHL12	1q32.1	0.805825	0.635036	0.778626	0.00428251	0.0656131
KLHL42	12p11.22	0.184466	0.109489	0.0381679	0.00138544	0.039632
KLRA1P	12p13.2	0.174757	0.10219	0.0381679	0.00248305	0.050572
KLRC1	12p13.2	0.174757	0.10219	0.0381679	0.00248305	0.050572
KLRC2	12p13.2	0.174757	0.109489	0.0381679	0.00271287	0.0516176
KLRC3	12p13.2	0.174757	0.109489	0.0381679	0.00271287	0.0516176
KLRC4	12p13.2	0.165049	0.109489	0.0381679	0.00506834	0.0697314
KLRC4-KLRK1	12p13.2	0.165049	0.109489	0.0381679	0.00506834	0.0697314
KLRD1	12p13.2	0.165049	0.109489	0.0381679	0.00506834	0.0697314
KLRF1	12p13.31	0.165049	0.10219	0.0381679	0.00484298	0.0692106
KLRF2	12p13.31	0.165049	0.10219	0.0381679	0.00484298	0.0692106
KLRK1	12p13.2	0.165049	0.109489	0.0381679	0.00506834	0.0697314
KMT2D	12q13.12	0.213592	0.124088	0.0610687	0.00231354	0.0484555
KMT5A	12q24.31	0.184466	0.131387	0.0381679	0.00149709	0.0415881
KNTC1	12q24.31	0.174757	0.145985	0.0458015	0.00467338	0.0685815
KRAS	12p12.1	0.194175	0.10219	0.0305344	0.000225355	0.0190381
KRR1	12q21.2	0.23301	0.160584	0.0610687	0.000866655	0.0291965
KRT1	12q13.13	0.23301	0.138686	0.0534351	0.000339736	0.0205734
KRT18	12q13.13	0.242718	0.131387	0.0610687	0.000316787	0.0204442
KRT19P2	12q22	0.203883	0.160584	0.0458015	0.000862856	0.0291965
KRT2	12q13.13	0.23301	0.138686	0.0534351	0.000339736	0.0205734
KRT3	12q13.13	0.23301	0.131387	0.0534351	0.00030023	0.0195615
KRT4	12q13.13	0.23301	0.131387	0.0534351	0.00030023	0.0195615
KRT5	12q13.13	0.23301	0.131387	0.0534351	0.00030023	0.0195615
KRT6A	12q13.13	0.223301	0.131387	0.0534351	0.000617787	0.0272526
KRT6B	12q13.13	0.223301	0.131387	0.0534351	0.000617787	0.0272526
KRT6C	12q13.13	0.223301	0.131387	0.0534351	0.000617787	0.0272526
KRT7	12q13.13	0.223301	0.116788	0.0610687	0.000954003	0.0315439
KRT71	12q13.13	0.23301	0.131387	0.0534351	0.00030023	0.0195615
KRT72	12q13.13	0.23301	0.138686	0.0534351	0.000339736	0.0205734
KRT73	12q13.13	0.23301	0.138686	0.0534351	0.000339736	0.0205734
KRT73-AS1	12q13.13	0.23301	0.138686	0.0534351	0.000339736	0.0205734
KRT74	12q13.13	0.23301	0.131387	0.0534351	0.00030023	0.0195615
KRT75	12q13.13	0.223301	0.131387	0.0610687	0.00133334	0.0385402
KRT76	12q13.13	0.23301	0.138686	0.0534351	0.000339736	0.0205734
KRT77	12q13.13	0.23301	0.138686	0.0534351	0.000339736	0.0205734
KRT78	12q13.13	0.23301	0.131387	0.0534351	0.00030023	0.0195615
KRT79	12q13.13	0.23301	0.131387	0.0534351	0.00030023	0.0195615
KRT8	12q13.13	0.242718	0.131387	0.0610687	0.000316787	0.0204442
KRT80	12q13.13	0.23301	0.116788	0.0534351	0.000203553	0.0190381
KRT81	12q13.13	0.223301	0.116788	0.0687023	0.00189141	0.0429139
KRT82	12q13.13	0.223301	0.131387	0.0610687	0.00133334	0.0385402
KRT83	12q13.13	0.23301	0.131387	0.0763359	0.00262755	0.0516176
KRT84	12q13.13	0.23301	0.131387	0.0610687	0.000661978	0.027297
KRT85	12q13.13	0.23301	0.131387	0.0687023	0.00136255	0.039134
KRT86	12q13.13	0.23301	0.131387	0.0763359	0.00262755	0.0516176
KSR2	12q24.22	0.223301	0.145985	0.0610687	0.00155504	0.0415881
LACRT	12q13.2	0.213592	0.160584	0.0534351	0.00119859	0.0356801
LAD1	1q32.1	0.805825	0.635036	0.770992	0.0055155	0.0719849
LALBA	12q13.11	0.213592	0.116788	0.0381679	0.000173483	0.0180439
LAMA5	20q13.33	0.436893	0.364964	0.229008	0.00258176	0.0514594
LAMA5-AS1	20q13.33	0.436893	0.364964	0.229008	0.00258176	0.0514594
LAMC1	1q25.3	0.815534	0.635036	0.778626	0.00279312	0.0516176
LAMC2	1q25.3	0.815534	0.635036	0.778626	0.00279312	0.0516176
LAMTOR4	7q22.1	0.203883	0.394161	0.305344	0.00683044	0.0819424
LARP4	12q13.12	0.23301	0.124088	0.0381679	4.20328e-05	0.0162045
LBP	20q11.23	0.407767	0.328467	0.198473	0.0019209	0.0429139
LDHB	12p12.1	0.174757	0.124088	0.0381679	0.00276487	0.0516176
LEMD3	12q14.3	0.203883	0.160584	0.0458015	0.000862856	0.0291965
LETMD1	12q13.12	0.252427	0.116788	0.0534351	3.78932e-05	0.0162045
LGR5	12q21.1	0.23301	0.160584	0.0534351	0.000381489	0.0205734
LGR6	1q32.1	0.796117	0.635036	0.770992	0.00818812	0.0927254
LHX4	1q25.2	0.815534	0.642336	0.770992	0.0056264	0.0727849
LHX4-AS1	1q25.2	0.815534	0.642336	0.770992	0.0056264	0.0727849
LHX5	12q24.13	0.223301	0.131387	0.0458015	0.000265989	0.0195615
LHX5-AS1	12q24.13	0.223301	0.131387	0.0458015	0.000265989	0.0195615
LIMA1	12q13.12	0.223301	0.109489	0.0381679	6.20773e-05	0.0162045
LIN7A	12q21.31	0.213592	0.167883	0.0687023	0.00498087	0.0693855
LINC00028	20q11.21	0.417476	0.335766	0.206107	0.00190494	0.0429139
LINC00029	20q13.33	0.427184	0.357664	0.236641	0.0069285	0.0823807
LINC00173	12q24.22	0.223301	0.131387	0.0534351	0.000617787	0.0272526
LINC00176	20q13.33	0.456311	0.372263	0.251908	0.00430445	0.0656131
LINC00202-1	10p12.1	0.271845	0.189781	0.114504	0.00887193	0.0962399
LINC00202-2	10p12.1	0.281553	0.19708	0.114504	0.00539723	0.0719849
LINC00264	10p12.1	0.281553	0.19708	0.114504	0.00539723	0.0719849
LINC00266-1	20q13.33	0.436893	0.386861	0.236641	0.00293355	0.0523415
LINC00272	1q25.3	0.815534	0.627737	0.778626	0.00171274	0.0421451
LINC00477	12p12.1	0.194175	0.109489	0.0305344	0.000266774	0.0195615
LINC00485	12q23.2	0.213592	0.145985	0.0534351	0.00131401	0.0381448
LINC00488	3q13.13	0.223301	0.131387	0.0687023	0.00268489	0.0516176
LINC00489	20q11.23	0.407767	0.321168	0.198473	0.00206209	0.0441382
LINC00494	20q13.13	0.427184	0.343066	0.21374	0.00187915	0.0429139
LINC00507	12q24.32	0.194175	0.131387	0.0534351	0.00424534	0.0656131
LINC00508	12q24.32	0.194175	0.131387	0.0534351	0.00424534	0.0656131
LINC00592	12q13.13	0.223301	0.116788	0.0534351	0.000447867	0.022301
LINC00615	12q21.33	0.23301	0.175182	0.0534351	0.000339887	0.0205734
LINC00619	10q11.21	0.223301	0.138686	0.0687023	0.00298831	0.0527845
LINC00659	20q13.33	0.427184	0.357664	0.229008	0.00432295	0.0656131
LINC00706	10p14	0.300971	0.189781	0.122137	0.00282978	0.0516176
LINC00707	10p14	0.300971	0.189781	0.122137	0.00282978	0.0516176
LINC00836	10p12.1	0.271845	0.19708	0.10687	0.00513637	0.0701862
LINC00840	10q11.21	0.223301	0.138686	0.0687023	0.00298831	0.0527845
LINC00841	10q11.21	0.213592	0.138686	0.0687023	0.00549009	0.0719849
LINC00862	1q32.1	0.834951	0.635036	0.770992	0.00131136	0.0381448
LINC00906	19q12	0.31068	0.182482	0.152672	0.00830087	0.0929193
LINC00934	12q24.23	0.203883	0.138686	0.0381679	0.000436451	0.022301
LINC00935	12q13.12	0.213592	0.131387	0.0610687	0.00258426	0.0514594
LINC00936	12q21.33	0.213592	0.145985	0.0534351	0.00131401	0.0381448
LINC00938	12q12	0.213592	0.124088	0.0305344	7.48854e-05	0.0162045
LINC00939	12q24.32	0.184466	0.138686	0.0534351	0.0070649	0.0831718
LINC00941	12p11.21	0.194175	0.116788	0.0381679	0.00076022	0.0284763
LINC00942	12p13.33	0.184466	0.124088	0.0534351	0.00743348	0.0866538
LINC00987	12p13.31	0.184466	0.138686	0.0534351	0.0070649	0.0831718
LINC01007	7q22.1	0.194175	0.394161	0.29771	0.0037972	0.0625355
LINC01031	1q31.2	0.825243	0.635036	0.763359	0.00271609	0.0516176
LINC01032	1q31.2	0.825243	0.635036	0.770992	0.00220928	0.0468674
LINC01036	1q31.1	0.805825	0.635036	0.770992	0.0055155	0.0719849
LINC01037	1q31.1	0.805825	0.642336	0.770992	0.00858764	0.0948936
LINC01056	20q13.33	0.427184	0.357664	0.236641	0.0069285	0.0823807
LINC01221	1q32.1	0.825243	0.656934	0.770992	0.00855922	0.0948936
LINC01234	12q24.13	0.223301	0.131387	0.0534351	0.000617787	0.0272526
LINC01260	20q13.12	0.417476	0.350365	0.206107	0.00156283	0.0415881
LINC01264	10q11.21	0.213592	0.124088	0.0763359	0.00823995	0.0927254
LINC01270	20q13.13	0.436893	0.364964	0.221374	0.00153518	0.0415881
LINC01271	20q13.13	0.436893	0.364964	0.221374	0.00153518	0.0415881
LINC01272	20q13.13	0.436893	0.357664	0.229008	0.0028303	0.0516176
LINC01273	20q13.13	0.427184	0.357664	0.229008	0.00432295	0.0656131
LINC01344	1q25.3	0.815534	0.627737	0.778626	0.00171274	0.0421451
LINC01350	1q25.3	0.825243	0.635036	0.770992	0.00220928	0.0468674
LINC01351	1q31.1	0.815534	0.642336	0.770992	0.0056264	0.0727849
LINC01370	20q12	0.407767	0.321168	0.21374	0.00553006	0.0719849
LINC01405	12q24.11	0.213592	0.131387	0.0381679	0.000218585	0.0190381
LINC01429	20q13.2	0.446602	0.357664	0.221374	0.00106949	0.0340454
LINC01440	20q13.2	0.427184	0.357664	0.229008	0.00432295	0.0656131
LINC01441	20q13.2	0.427184	0.357664	0.229008	0.00432295	0.0656131
LINC01465	12q14.1	0.223301	0.160584	0.0381679	0.00011224	0.0162045
LINC01479	12q15	0.213592	0.160584	0.0610687	0.00262897	0.0516176
LINC01481	12q15	0.213592	0.160584	0.0534351	0.00119859	0.0356801
LINC01486	12q24.11	0.23301	0.145985	0.0381679	5.93808e-05	0.0162045
LINC01489	12p12.3	0.15534	0.109489	0.0381679	0.00900593	0.0962399
LINC01490	12q21.31	0.213592	0.167883	0.0687023	0.00498087	0.0693855
LINC01498	12q23.3	0.223301	0.153285	0.0381679	0.000117796	0.0162045
LINC01516	10p12.1	0.271845	0.19708	0.114504	0.00898067	0.0962399
LINC01518	10q11.21	0.213592	0.116788	0.0763359	0.00690907	0.0822867
LINC01522	20q13.13	0.436893	0.343066	0.221374	0.00195995	0.0432036
LINC01523	20q13.13	0.436893	0.343066	0.221374	0.00195995	0.0432036
LINC01524	20q13.2	0.456311	0.357664	0.229008	0.00111445	0.0342584
LINC01532	19q12	0.31068	0.182482	0.152672	0.00830087	0.0929193
LINC01559	12p13.1	0.15534	0.10219	0.0381679	0.00899397	0.0962399
LINC01598	20q11.1	0.378641	0.350365	0.206107	0.00687927	0.0822495
LINC01619	12q21.33	0.23301	0.153285	0.0458015	0.000158277	0.0170415
LINP1	10p14	0.291262	0.189781	0.122137	0.00506537	0.0697314
LKAAEAR1	20q13.33	0.456311	0.372263	0.251908	0.00430445	0.0656131
LLPH	12q14.3	0.203883	0.160584	0.0458015	0.000862856	0.0291965
LLPH-AS1	12q14.3	0.203883	0.160584	0.0458015	0.000862856	0.0291965
LMBR1L	12q13.12	0.213592	0.116788	0.0534351	0.00094976	0.0314522
LMNTD1	12p12.1	0.194175	0.10219	0.0305344	0.000225355	0.0190381
LMOD1	1q32.1	0.796117	0.635036	0.778626	0.0062993	0.0779683
LOC100049716	12p13.33	0.223301	0.153285	0.0763359	0.00634998	0.0779683
LOC100128988	20q12	0.417476	0.335766	0.21374	0.00317607	0.055354
LOC100129940	12q14.3	0.203883	0.160584	0.0458015	0.000862856	0.0291965
LOC100130075	12q15	0.223301	0.167883	0.0763359	0.00608396	0.0772703
LOC100130587	20q13.33	0.436893	0.357664	0.236641	0.00458874	0.0679933
LOC100131496	20q13.12	0.436893	0.328467	0.221374	0.00207821	0.0444389
LOC100190940	12q24.33	0.184466	0.131387	0.0534351	0.00740703	0.0864867
LOC100240734	12q13.13	0.213592	0.145985	0.0458015	0.000568793	0.025985
LOC100240735	12q13.13	0.213592	0.145985	0.0458015	0.000568793	0.025985
LOC100287792	20q11.23	0.407767	0.321168	0.198473	0.00206209	0.0441382
LOC100287944	12q23.3	0.223301	0.138686	0.0458015	0.000289403	0.0195615
LOC100288798	12q13.11	0.223301	0.116788	0.0381679	7.81733e-05	0.0162045
LOC100289561	7q22.1	0.194175	0.394161	0.305344	0.00398422	0.063611
LOC100335030	12q13.12	0.223301	0.109489	0.0458015	0.00015441	0.0170415
LOC100505771	20q13.33	0.446602	0.386861	0.259542	0.00850699	0.0946861
LOC100505978	12q23.3	0.223301	0.138686	0.0458015	0.000289403	0.0195615
LOC100506125	12q13.12	0.213592	0.131387	0.0610687	0.00258426	0.0514594
LOC100506159	12p13.31	0.165049	0.10219	0.0381679	0.00484298	0.0692106
LOC100506175	20q13.13	0.436893	0.357664	0.206107	0.000565302	0.025985
LOC100506314	12p13.1	0.15534	0.10219	0.0381679	0.00899397	0.0962399
LOC100506384	20q13.32	0.456311	0.350365	0.221374	0.000690241	0.027297
LOC100506393	12p12.2	0.174757	0.124088	0.0381679	0.00276487	0.0516176
LOC100506470	20q13.33	0.456311	0.357664	0.236641	0.00184893	0.0429139
LOC100506551	12q24.22	0.223301	0.131387	0.0458015	0.000265989	0.0195615
LOC100506606	12p11.22	0.194175	0.116788	0.0458015	0.00177104	0.0423507
LOC100506747	1q32.1	0.805825	0.635036	0.778626	0.00428251	0.0656131
LOC100506844	12q14.1	0.223301	0.153285	0.0610687	0.00157804	0.0415881
LOC100506869	12q14.1	0.223301	0.175182	0.0458015	0.000237573	0.0192084
LOC100507065	12q14.3	0.203883	0.160584	0.0458015	0.000862856	0.0291965
LOC100507091	12q24.31	0.194175	0.138686	0.0381679	0.000799171	0.0291965
LOC100507175	12q15	0.203883	0.160584	0.0610687	0.00430061	0.0656131
LOC100507195	12q15	0.213592	0.160584	0.0687023	0.00539849	0.0719849
LOC100507250	12q15	0.213592	0.160584	0.0610687	0.00262897	0.0516176
LOC100507377	12q21.1	0.23301	0.160584	0.0610687	0.000866655	0.0291965
LOC100507424	12p13.33	0.174757	0.116788	0.0458015	0.00625	0.0779683
LOC100630923	7q22.1	0.194175	0.394161	0.305344	0.00398422	0.063611
LOC100652999	12q13.13	0.23301	0.131387	0.0458015	0.000126613	0.0165415
LOC100996679	12q24.32	0.194175	0.131387	0.0534351	0.00424534	0.0656131
LOC101593348	12q24.31	0.174757	0.153285	0.0458015	0.0039215	0.063611
LOC101927038	12q12	0.223301	0.116788	0.0305344	2.87746e-05	0.0162045
LOC101927058	12q12	0.223301	0.116788	0.0305344	2.87746e-05	0.0162045
LOC101927267	12q13.12	0.213592	0.109489	0.0610687	0.0016045	0.0421451
LOC101927292	12q13.12	0.223301	0.116788	0.0381679	7.81733e-05	0.0162045
LOC101927318	12q13.12	0.223301	0.109489	0.0381679	6.20773e-05	0.0162045
LOC101927377	20q13.12	0.436893	0.335766	0.221374	0.00203972	0.0440554
LOC101927415	12q24.31	0.194175	0.131387	0.0381679	0.000823478	0.0291965
LOC101927464	12q24.32	0.184466	0.131387	0.0534351	0.00740703	0.0864867
LOC101927653	12q14.1	0.223301	0.175182	0.0458015	0.000237573	0.0192084
LOC101927694	12q24.32	0.194175	0.131387	0.0534351	0.00424534	0.0656131
LOC101927735	12q24.33	0.184466	0.131387	0.0534351	0.00740703	0.0864867
LOC101927746	7q22.1	0.194175	0.40146	0.29771	0.00253452	0.0513277
LOC101927770	20q13.2	0.456311	0.379562	0.236641	0.00147702	0.0415881
LOC101927901	12q15	0.203883	0.160584	0.0610687	0.00430061	0.0656131
LOC101927932	20q13.32	0.456311	0.357664	0.229008	0.00111445	0.0342584
LOC101928002	12q15	0.23301	0.167883	0.0534351	0.000366659	0.0205734
LOC101928048	20q13.33	0.456311	0.357664	0.221374	0.000654191	0.027297
LOC101928100	12p13.2	0.165049	0.109489	0.0381679	0.00506834	0.0697314
LOC101928137	12q21.1	0.23301	0.160584	0.0687023	0.00184539	0.0429139
LOC101928150	10p14	0.281553	0.189781	0.122137	0.00876923	0.0961072
LOC101928162	12p13.2	0.174757	0.10219	0.0458015	0.00543344	0.0719849
LOC101928322	10p14	0.291262	0.189781	0.129771	0.00830488	0.0929193
LOC101928441	12p12.1	0.174757	0.109489	0.0381679	0.00271287	0.0516176
LOC101928449	12q21.31	0.213592	0.160584	0.0687023	0.00539849	0.0719849
LOC101928453	10p13	0.281553	0.189781	0.122137	0.00876923	0.0961072
LOC101928471	12p12.1	0.174757	0.109489	0.0305344	0.00111993	0.0343284
LOC101928530	12q24.33	0.194175	0.153285	0.0534351	0.00362153	0.0597344
LOC101928597	12q24.33	0.194175	0.145985	0.0610687	0.00822398	0.0927254
LOC101928617	12q21.33	0.23301	0.153285	0.0458015	0.000158277	0.0170415
LOC101928731	12q22	0.203883	0.167883	0.0458015	0.000746646	0.0283646
LOC101928937	12q23.1	0.213592	0.167883	0.0381679	0.000178673	0.0180578
LOC101928973	1q25.3	0.805825	0.627737	0.763359	0.00441881	0.0663937
LOC101929058	12q23.2	0.223301	0.145985	0.0610687	0.00155504	0.0415881
LOC101929073	10p12.1	0.271845	0.19708	0.10687	0.00513637	0.0701862
LOC101929084	12q23.3	0.223301	0.145985	0.0687023	0.00318803	0.055354
LOC101929117	10p12.1	0.281553	0.19708	0.114504	0.00539723	0.0719849
LOC101929162	12q23.3	0.223301	0.138686	0.0381679	0.000114708	0.0162045
LOC101929224	1q32.1	0.815534	0.635036	0.770992	0.00356509	0.05948
LOC101929445	10q11.21	0.213592	0.124088	0.0763359	0.00823995	0.0927254
LOC101929698	20q11.21	0.38835	0.328467	0.19084	0.00267377	0.0516176
LOC102724020	12p13.2	0.165049	0.10219	0.0381679	0.00484298	0.0692106
LOC102724050	12q13.13	0.213592	0.160584	0.0610687	0.00262897	0.0516176
LOC102724094	7q22.1	0.194175	0.40146	0.312977	0.00280129	0.0516176
LOC102724264	10q11.21	0.223301	0.138686	0.0763359	0.00569004	0.0727849
LOC102724421	12q14.3	0.203883	0.160584	0.0610687	0.00430061	0.0656131
LOC102724663	12q21.31	0.203883	0.167883	0.0610687	0.00380331	0.062588
LOC102724708	8q13.2	0.660194	0.489051	0.458015	0.00494941	0.0693855
LOC102724719	10q11.23	0.203883	0.124088	0.0687023	0.00849107	0.0945908
LOC102724919	1q31.1	0.805825	0.635036	0.770992	0.0055155	0.0719849
LOC102724933	12q22	0.203883	0.175182	0.0458015	0.000623924	0.027297
LOC102724958	19q12	0.31068	0.182482	0.152672	0.00830087	0.0929193
LOC105369187	12q14.3	0.203883	0.160584	0.0458015	0.000862856	0.0291965
LOC105369691	12p12.1	0.174757	0.109489	0.0458015	0.00598364	0.0760412
LOC105369738	12q12	0.223301	0.116788	0.0305344	2.87746e-05	0.0162045
LOC105369739	12q12	0.223301	0.116788	0.0305344	2.87746e-05	0.0162045
LOC105369747	12q13.11	0.213592	0.131387	0.0305344	8.17077e-05	0.0162045
LOC105369781	12q13.2	0.23301	0.160584	0.0687023	0.00184539	0.0429139
LOC105369785	12q14.1	0.213592	0.153285	0.0610687	0.00277833	0.0516176
LOC105369860	12q21.2	0.213592	0.167883	0.0610687	0.00239834	0.049127
LOC105369879	12q21.32	0.203883	0.160584	0.0610687	0.00430061	0.0656131
LOC105369891	12q21.33	0.213592	0.145985	0.0534351	0.00131401	0.0381448
LOC105369893	12q21.33	0.213592	0.167883	0.0534351	0.00108209	0.0340454
LOC105369911	12q22	0.203883	0.160584	0.0534351	0.00199521	0.0434445
LOC105369920	12q23.1	0.213592	0.167883	0.0458015	0.000455887	0.022301
LOC105369921	12q22	0.213592	0.167883	0.0458015	0.000455887	0.022301
LOC105369945	12q23.2	0.223301	0.145985	0.0687023	0.00318803	0.055354
LOC105369971	12q13.13	0.242718	0.116788	0.0458015	3.71303e-05	0.0162045
LOC105369980	12q24.11	0.213592	0.131387	0.0381679	0.000218585	0.0190381
LOC105370014	12q24.23	0.203883	0.138686	0.0381679	0.000436451	0.022301
LOC105370016	12q24.23	0.203883	0.138686	0.0381679	0.000436451	0.022301
LOC105370024	12q24.23	0.203883	0.138686	0.0381679	0.000436451	0.022301
LOC105372653	20q13.13	0.436893	0.343066	0.206107	0.000677966	0.027297
LOC105372672	20q13.2	0.446602	0.386861	0.236641	0.0019934	0.0434445
LOC105372682	20q13.31	0.436893	0.357664	0.221374	0.00169994	0.0421451
LOC105372695	20q13.32	0.456311	0.357664	0.236641	0.00184893	0.0429139
LOC105375429	7q22.1	0.203883	0.40146	0.305344	0.00467645	0.0685815
LOC105376351	10p15.3	0.281553	0.189781	0.122137	0.00876923	0.0961072
LOC105378269	10q11.21	0.213592	0.116788	0.0763359	0.00690907	0.0822867
LOC105378292	10q11.22	0.223301	0.131387	0.0839695	0.00897212	0.0962399
LOC105379477	20q11.1	0.378641	0.350365	0.206107	0.00687927	0.0822495
LOC107001062	10q11.22	0.223301	0.131387	0.0839695	0.00897212	0.0962399
LOC107161159	12q24.33	0.194175	0.138686	0.0610687	0.00857909	0.0948936
LOC148709	1q32.1	0.805825	0.635036	0.778626	0.00428251	0.0656131
LOC149684	20q11.23	0.407767	0.321168	0.19084	0.00120566	0.0356801
LOC149950	20q11.21	0.378641	0.321168	0.19084	0.00450241	0.0673664
LOC283028	10q11.21	0.213592	0.116788	0.0763359	0.00690907	0.0822867
LOC283332	12q13.12	0.223301	0.116788	0.0381679	7.81733e-05	0.0162045
LOC283335	12q13.13	0.23301	0.138686	0.0381679	5.54256e-05	0.0162045
LOC283352	12q24.33	0.184466	0.131387	0.0534351	0.00740703	0.0864867
LOC283440	12p13.33	0.174757	0.116788	0.0458015	0.00625	0.0779683
LOC284648	1q25.3	0.815534	0.627737	0.778626	0.00171274	0.0421451
LOC339568	20q12	0.407767	0.321168	0.206107	0.00342556	0.0582508
LOC374443	12p13.31	0.165049	0.109489	0.0381679	0.00506834	0.0697314
LOC399715	10p15.1	0.281553	0.189781	0.122137	0.00876923	0.0961072
LOC400002	12p13.31	0.165049	0.10219	0.0381679	0.00484298	0.0692106
LOC400043	12q13.13	0.213592	0.145985	0.0458015	0.000568793	0.025985
LOC414300	12q23.3	0.223301	0.145985	0.0534351	0.0007092	0.027297
LOC440704	1q31.1	0.815534	0.642336	0.770992	0.0056264	0.0727849
LOC613266	20p12.1	0.368932	0.328467	0.198473	0.0094038	0.0991565
LOC63930	20q13.33	0.446602	0.357664	0.236641	0.00295405	0.0525258
LOC642846	12p13.31	0.194175	0.145985	0.0610687	0.00822398	0.0927254
LOC643339	12q22	0.223301	0.182482	0.0534351	0.000502315	0.0243498
LOC643711	12q23.1	0.223301	0.175182	0.0458015	0.000237573	0.0192084
LOC643770	12q23.1	0.213592	0.175182	0.0458015	0.000393488	0.0208685
LOC645177	12p12.1	0.194175	0.109489	0.0305344	0.000266774	0.0195615
LOC645485	12p11.21	0.194175	0.116788	0.0381679	0.00076022	0.0284763
LOC728084	12q21.33	0.223301	0.153285	0.0534351	0.000713448	0.027297
LOC728739	12q23.3	0.223301	0.145985	0.0458015	0.000301283	0.0195615
LOC729296	20q13.33	0.456311	0.350365	0.221374	0.000690241	0.027297
LOC730102	1q25.2	0.805825	0.642336	0.778626	0.00676669	0.0819424
LOC79160	20q13.32	0.456311	0.357664	0.236641	0.00184893	0.0429139
LOH12CR2	12p13.2	0.15534	0.109489	0.0305344	0.00389559	0.063611
LPIN3	20q12	0.427184	0.350365	0.206107	0.00100297	0.0329595
LRCH4	7q22.1	0.203883	0.40146	0.29771	0.00435461	0.0656131
LRCOL1	12q24.33	0.194175	0.145985	0.0534351	0.00397602	0.063611
LRIG3	12q14.1	0.213592	0.175182	0.0534351	0.000943162	0.0314522
LRMP	12p12.1	0.194175	0.10219	0.0305344	0.000225355	0.0190381
LRP1	12q13.3	0.223301	0.145985	0.0534351	0.0007092	0.027297
LRP1-AS	12q13.3	0.223301	0.145985	0.0534351	0.0007092	0.027297
LRP6	12p13.2	0.15534	0.116788	0.0381679	0.00856006	0.0948936
LRRC10	12q15	0.23301	0.167883	0.0534351	0.000366659	0.0205734
LRRC17	7q22.1	0.203883	0.40146	0.29771	0.00435461	0.0656131
LRRC37A6P	10p12.1	0.271845	0.189781	0.114504	0.00887193	0.0962399
LRRIQ1	12q21.31	0.213592	0.167883	0.0534351	0.00108209	0.0340454
LRRK2	12q12	0.213592	0.124088	0.0381679	0.00019964	0.0190381
LRWD1	7q22.1	0.194175	0.394161	0.305344	0.00398422	0.063611
LSM14B	20q13.33	0.456311	0.364964	0.229008	0.00104487	0.0340454
LTA4H	12q23.1	0.213592	0.167883	0.0458015	0.000455887	0.022301
LUM	12q21.33	0.23301	0.167883	0.0534351	0.000366659	0.0205734
LYZ	12q15	0.23301	0.175182	0.0610687	0.000785932	0.0291844
MAFB	20q12	0.417476	0.328467	0.206107	0.00203784	0.0440554
MAGOHB	12p13.2	0.174757	0.10219	0.0381679	0.00248305	0.050572
MANBAL	20q11.23	0.407767	0.328467	0.19084	0.00111195	0.0342584
MANSC1	12p13.2	0.15534	0.116788	0.0381679	0.00856006	0.0948936
MANSC4	12p11.22	0.184466	0.109489	0.0458015	0.00313158	0.0550881
MAP1LC3A	20q11.22	0.38835	0.321168	0.206107	0.00809116	0.0927254
MAP1LC3B2	12q24.22	0.223301	0.131387	0.0534351	0.000617787	0.0272526
MAP3K12	12q13.13	0.23301	0.138686	0.0458015	0.000142507	0.0170415
MAPKAPK5	12q24.12	0.213592	0.138686	0.0458015	0.00056531	0.025985
MAPKAPK5-AS1	12q24.12	0.213592	0.138686	0.0458015	0.00056531	0.025985
MAPRE1	20q11.21	0.38835	0.321168	0.198473	0.00499034	0.0693855
MARS	12q13.3	0.223301	0.160584	0.0763359	0.00632971	0.0779683
MATN4	20q13.12	0.417476	0.343066	0.21374	0.00293636	0.0523415
MBD6	12q13.3	0.223301	0.160584	0.0763359	0.00632971	0.0779683
MBLAC1	7q22.1	0.203883	0.394161	0.305344	0.00683044	0.0819424
MC3R	20q13.2	0.446602	0.357664	0.221374	0.00106949	0.0340454
MCM10	10p13	0.300971	0.189781	0.129771	0.00472048	0.0691799
MCM3AP	21q22.3	0.165049	0.0729927	0.0534351	0.00849401	0.0945908
MCM7	7q22.1	0.203883	0.394161	0.312977	0.00706422	0.0831718
MCMDC2	8q13.1	0.660194	0.481752	0.458015	0.00424735	0.0656131
MCRS1	12q13.12	0.223301	0.109489	0.0381679	6.20773e-05	0.0162045
MDM1	12q15	0.203883	0.160584	0.0610687	0.00430061	0.0656131
MED13L	12q24.21	0.223301	0.131387	0.0534351	0.000617787	0.0272526
MED21	12p11.23	0.194175	0.109489	0.0381679	0.000676962	0.027297
MEPCE	7q22.1	0.203883	0.40146	0.29771	0.00435461	0.0656131
METAP2	12q22	0.213592	0.167883	0.0534351	0.00108209	0.0340454
METTL1	12q14.1	0.223301	0.153285	0.0763359	0.00634998	0.0779683
METTL21B	12q14.1	0.223301	0.153285	0.0763359	0.00634998	0.0779683
METTL25	12q21.31	0.213592	0.160584	0.0687023	0.00539849	0.0719849
METTL7A	12q13.12	0.252427	0.116788	0.0610687	8.65335e-05	0.0162045
METTL7B	12q13.2	0.213592	0.167883	0.0534351	0.00108209	0.0340454
MFSD4A	1q32.1	0.805825	0.642336	0.770992	0.00858764	0.0948936
MFSD5	12q13.13	0.223301	0.131387	0.0381679	0.000105951	0.0162045
MGAT4C	12q21.31	0.213592	0.167883	0.0610687	0.00239834	0.049127
MGAT4EP	1q32.1	0.805825	0.635036	0.778626	0.00428251	0.0656131
MIP	12q13.3	0.242718	0.145985	0.0305344	1.00604e-05	0.0162045
MIR1-1	20q13.33	0.436893	0.364964	0.229008	0.00258176	0.0514594
MIR1-1HG	20q13.33	0.436893	0.364964	0.229008	0.00258176	0.0514594
MIR106B	7q22.1	0.203883	0.394161	0.312977	0.00706422	0.0831718
MIR1178	12q24.23	0.203883	0.138686	0.0458015	0.00106015	0.0340454
MIR1228	12q13.3	0.223301	0.145985	0.0534351	0.0007092	0.027297
MIR1231	1q32.1	0.796117	0.635036	0.778626	0.0062993	0.0779683
MIR124-3	20q13.33	0.436893	0.350365	0.236641	0.00487932	0.0692106
MIR1251	12q23.1	0.223301	0.175182	0.0458015	0.000237573	0.0192084
MIR1252	12q21.2	0.213592	0.167883	0.0610687	0.00239834	0.049127
MIR1254-2	10p12.2	0.271845	0.20438	0.114504	0.00881805	0.0962399
MIR1257	20q13.33	0.456311	0.372263	0.236641	0.00162426	0.0421451
MIR1278	1q31.2	0.825243	0.642336	0.778626	0.00283552	0.0516176
MIR1279	12q15	0.23301	0.167883	0.0610687	0.000840217	0.0291965
MIR1289-1	20q11.22	0.407767	0.328467	0.19084	0.00111195	0.0342584
MIR1291	12q13.11	0.213592	0.116788	0.0381679	0.000173483	0.0180439
MIR1293	12q13.12	0.223301	0.109489	0.0381679	6.20773e-05	0.0162045
MIR1302-1	12q24.13	0.223301	0.138686	0.0458015	0.000289403	0.0195615
MIR1302-5	20q13.13	0.427184	0.357664	0.206107	0.000893503	0.0299596
MIR133A2	20q13.33	0.436893	0.357664	0.229008	0.0028303	0.0516176
MIR135A2	12q23.1	0.223301	0.175182	0.0458015	0.000237573	0.0192084
MIR135B	1q32.1	0.815534	0.642336	0.755725	0.00816971	0.0927254
MIR148B	12q13.13	0.213592	0.153285	0.0610687	0.00277833	0.0516176
MIR181A1HG	1q32.1	0.834951	0.664234	0.770992	0.00811206	0.0927254
MIR1825	20q11.21	0.378641	0.328467	0.183206	0.00230916	0.0484555
MIR1827	12q23.1	0.213592	0.167883	0.0534351	0.00108209	0.0340454
MIR1914	20q13.33	0.456311	0.372263	0.259542	0.00674645	0.0819424
MIR196A2	12q13.13	0.23301	0.145985	0.0458015	0.0001534	0.0170415
MIR25	7q22.1	0.203883	0.394161	0.312977	0.00706422	0.0831718
MIR26A2	12q14.1	0.23301	0.153285	0.0763359	0.00360103	0.059718
MIR296	20q13.32	0.456311	0.357664	0.236641	0.00184893	0.0429139
MIR298	20q13.32	0.456311	0.357664	0.236641	0.00184893	0.0429139
MIR3121	1q25.3	0.805825	0.635036	0.763359	0.00690405	0.0822867
MIR3193	20q11.21	0.398058	0.328467	0.198473	0.00298702	0.0527845
MIR3194	20q13.2	0.446602	0.350365	0.221374	0.00114422	0.0347253
MIR3195	20q13.33	0.456311	0.364964	0.229008	0.00104487	0.0340454
MIR3196	20q13.33	0.436893	0.350365	0.236641	0.00487932	0.0692106
MIR3198-2	12q13.13	0.223301	0.145985	0.0534351	0.0007092	0.027297
MIR331	12q22	0.213592	0.167883	0.0610687	0.00239834	0.049127
MIR3612	12q24.32	0.194175	0.131387	0.0610687	0.0085861	0.0948936
MIR3616	20q13.12	0.427184	0.328467	0.21374	0.00209136	0.0446755
MIR3617	20q13.12	0.417476	0.343066	0.206107	0.0017435	0.0421451
MIR3649	12p13.33	0.194175	0.145985	0.0610687	0.00822398	0.0927254
MIR3652	12q23.3	0.223301	0.145985	0.0534351	0.0007092	0.027297
MIR3657	12q24.13	0.213592	0.138686	0.0458015	0.00056531	0.025985
MIR3685	12q22	0.213592	0.167883	0.0610687	0.00239834	0.049127
MIR3908	12q24.31	0.194175	0.131387	0.0381679	0.000823478	0.0291965
MIR3913-1	12q15	0.23301	0.167883	0.0534351	0.000366659	0.0205734
MIR3913-2	12q15	0.23301	0.167883	0.0534351	0.000366659	0.0205734
MIR3922	12q23.3	0.223301	0.153285	0.0534351	0.000713448	0.027297
MIR4285	7q22.1	0.194175	0.394161	0.305344	0.00398422	0.063611
MIR4302	12p12.1	0.194175	0.10219	0.0305344	0.000225355	0.0190381
MIR4303	12q23.1	0.223301	0.175182	0.0458015	0.000237573	0.0192084
MIR4304	12q24.31	0.194175	0.138686	0.0381679	0.000799171	0.0291965
MIR4325	20q13.31	0.456311	0.343066	0.236641	0.0019388	0.0429139
MIR4326	20q13.33	0.436893	0.350365	0.236641	0.00487932	0.0692106
MIR4419B	12q24.32	0.194175	0.131387	0.0610687	0.0085861	0.0948936
MIR4424	1q25.2	0.815534	0.642336	0.770992	0.0056264	0.0727849
MIR4426|chr1	1q31.2	0.825243	0.635036	0.78626	0.00134008	0.0385402
MIR4454|chr10	10p14	0.281553	0.189781	0.122137	0.00876923	0.0961072
MIR4467	7q22.1	0.194175	0.394161	0.305344	0.00398422	0.063611
MIR4472-2	12q24.22	0.223301	0.131387	0.0458015	0.000265989	0.0195615
MIR4477A|chr20	20q11.1	0.378641	0.350365	0.206107	0.00687927	0.0822495
MIR4480	10p13	0.281553	0.182482	0.122137	0.00811811	0.0927254
MIR4481	10p13	0.281553	0.182482	0.122137	0.00811811	0.0927254
MIR4494	12q13.11	0.213592	0.131387	0.0305344	8.17077e-05	0.0162045
MIR4495	12q23.1	0.223301	0.175182	0.0458015	0.000237573	0.0192084
MIR4496	12q24.11	0.223301	0.145985	0.0381679	0.000118739	0.0162045
MIR4497	12q24.11	0.213592	0.138686	0.0610687	0.00276026	0.0516176
MIR4498	12q24.23	0.184466	0.138686	0.0458015	0.00327163	0.0559441
MIR4532	20q13.32	0.456311	0.343066	0.236641	0.0019388	0.0429139
MIR4533	20q13.33	0.456311	0.357664	0.221374	0.000654191	0.027297
MIR4653	7q22.1	0.194175	0.408759	0.29771	0.00166154	0.0421451
MIR4658	7q22.1	0.203883	0.394161	0.305344	0.00683044	0.0819424
MIR4698	12q13.11	0.213592	0.145985	0.0381679	0.000228225	0.0190381
MIR4699	12q21.31	0.213592	0.167883	0.0687023	0.00498087	0.0693855
MIR4700	12q24.31	0.174757	0.138686	0.0381679	0.00233389	0.0485494
MIR4701	12q13.12	0.213592	0.131387	0.0610687	0.00258426	0.0514594
MIR4735	1q31.3	0.825243	0.649635	0.78626	0.00357835	0.05948
MIR4756	20q13.2	0.446602	0.364964	0.236641	0.00275936	0.0516176
MIR4758	20q13.33	0.436893	0.364964	0.229008	0.00258176	0.0514594
MIR492	12q22	0.203883	0.160584	0.0458015	0.000862856	0.0291965
MIR499A	20q11.22	0.407767	0.321168	0.19084	0.00120566	0.0356801
MIR499B	20q11.22	0.407767	0.321168	0.19084	0.00120566	0.0356801
MIR5090	7q22.1	0.194175	0.394161	0.305344	0.00398422	0.063611
MIR5100	10q11.21	0.223301	0.131387	0.0763359	0.00506308	0.0697314
MIR5188	12q24.31	0.184466	0.138686	0.0381679	0.00139869	0.0396933
MIR5191	1q32.1	0.796117	0.635036	0.778626	0.0062993	0.0779683
MIR548AG2	20q13.33	0.456311	0.357664	0.221374	0.000654191	0.027297
MIR548AK	10p14	0.291262	0.182482	0.122137	0.00458716	0.0679933
MIR548AQ|chr12	12q24.31	0.194175	0.138686	0.0458015	0.00190482	0.0429139
MIR548C	12q14.2	0.203883	0.160584	0.0534351	0.00199521	0.0434445
MIR548O	7q22.1	0.194175	0.394161	0.305344	0.00398422	0.063611
MIR548O2	20q11.23	0.407767	0.321168	0.198473	0.00206209	0.0441382
MIR548Q	10p13	0.281553	0.182482	0.122137	0.00811811	0.0927254
MIR548Z	12q14.2	0.203883	0.160584	0.0534351	0.00199521	0.0434445
MIR5700	12q22	0.203883	0.160584	0.0458015	0.000862856	0.0291965
MIR603	10p12.2	0.271845	0.19708	0.114504	0.00898067	0.0962399
MIR6074	12q14.3	0.203883	0.160584	0.0458015	0.000862856	0.0291965
MIR6125	12q14.1	0.23301	0.160584	0.0458015	0.000156864	0.0170415
MIR613	12p13.1	0.15534	0.10219	0.0381679	0.00899397	0.0962399
MIR614	12p13.1	0.15534	0.10219	0.0381679	0.00899397	0.0962399
MIR615	12q13.13	0.23301	0.145985	0.0458015	0.0001534	0.0170415
MIR616	12q13.3	0.223301	0.160584	0.0763359	0.00632971	0.0779683
MIR617	12q21.31	0.213592	0.167883	0.0687023	0.00498087	0.0693855
MIR618	12q21.31	0.213592	0.167883	0.0687023	0.00498087	0.0693855
MIR619	12q24.11	0.23301	0.145985	0.0458015	0.0001534	0.0170415
MIR620	12q24.21	0.223301	0.131387	0.0381679	0.000105951	0.0162045
MIR645	20q13.13	0.427184	0.364964	0.206107	0.000779901	0.0290612
MIR646	20q13.33	0.456311	0.357664	0.221374	0.000654191	0.027297
MIR646HG	20q13.33	0.456311	0.357664	0.221374	0.000654191	0.027297
MIR647	20q13.33	0.456311	0.372263	0.259542	0.00674645	0.0819424
MIR6502	12q14.3	0.203883	0.160584	0.0458015	0.000862856	0.0291965
MIR6505	12q13.11	0.213592	0.131387	0.0305344	8.17077e-05	0.0162045
MIR6739	1q32.1	0.796117	0.635036	0.778626	0.0062993	0.0779683
MIR6740	1q32.1	0.796117	0.635036	0.778626	0.0062993	0.0779683
MIR6757	12q13.13	0.23301	0.138686	0.0381679	5.54256e-05	0.0162045
MIR6758	12q13.3	0.223301	0.153285	0.0763359	0.00634998	0.0779683
MIR6760	12q24.12	0.213592	0.131387	0.0381679	0.000218585	0.0190381
MIR6761	12q24.12	0.213592	0.138686	0.0458015	0.00056531	0.025985
MIR6762	12q24.13	0.223301	0.131387	0.0458015	0.000265989	0.0195615
MIR6763	12q24.33	0.194175	0.145985	0.0534351	0.00397602	0.063611
MIR6812	20q13.12	0.417476	0.343066	0.206107	0.0017435	0.0421451
MIR6813	20q13.33	0.456311	0.372263	0.251908	0.00430445	0.0656131
MIR6840	7q22.1	0.203883	0.394161	0.305344	0.00683044	0.0819424
MIR6861	12q24.13	0.213592	0.138686	0.0534351	0.00129549	0.0380234
MIR6871	20q12	0.427184	0.343066	0.21374	0.00187915	0.0429139
MIR6875	7q22.1	0.203883	0.40146	0.305344	0.00467645	0.0685815
MIR6880	12q24.31	0.184466	0.138686	0.0381679	0.00139869	0.0396933
MIR7106	12q24.13	0.223301	0.131387	0.0458015	0.000265989	0.0195615
MIR7107	12q24.31	0.194175	0.138686	0.0458015	0.00190482	0.0429139
MIR7641-2|chr20	20q11.21	0.378641	0.328467	0.183206	0.00230916	0.0484555
MIR7844	12q22	0.203883	0.160584	0.0458015	0.000862856	0.0291965
MIR7851	12q12	0.223301	0.116788	0.0305344	2.87746e-05	0.0162045
MIR8072	12q24.31	0.184466	0.131387	0.0381679	0.00149709	0.0415881
MIR8086	10p12.1	0.271845	0.182482	0.114504	0.00849282	0.0945908
MIR920	12p12.1	0.174757	0.109489	0.0305344	0.00111993	0.0343284
MIR93	7q22.1	0.203883	0.394161	0.312977	0.00706422	0.0831718
MIR941-1	20q13.33	0.456311	0.379562	0.259542	0.00632266	0.0779683
MIR941-2	20q13.33	0.456311	0.379562	0.259542	0.00632266	0.0779683
MIR941-3	20q13.33	0.456311	0.379562	0.259542	0.00632266	0.0779683
MIR941-4	20q13.33	0.456311	0.379562	0.259542	0.00632266	0.0779683
MIRLET7I	12q14.1	0.223301	0.160584	0.0381679	0.00011224	0.0162045
MKRN7P	20q13.12	0.417476	0.335766	0.221374	0.00515	0.0702828
MKRN9P	12q21.32	0.213592	0.160584	0.0610687	0.00262897	0.0516176
MKX	10p12.1	0.271845	0.189781	0.114504	0.00887193	0.0962399
MKX-AS1	10p12.1	0.271845	0.189781	0.114504	0.00887193	0.0962399
MLEC	12q24.31	0.174757	0.138686	0.0381679	0.00233389	0.0485494
MLLT10P1	20q11.21	0.398058	0.364964	0.221374	0.00695548	0.0826557
MMAB	12q24.11	0.23301	0.145985	0.0534351	0.000367925	0.0205734
MMP17	12q24.33	0.194175	0.153285	0.0610687	0.00757977	0.0878811
MMP19	12q13.2	0.213592	0.167883	0.0610687	0.00239834	0.049127
MMP24	20q11.22	0.407767	0.321168	0.183206	0.000684283	0.027297
MMP24-AS1	20q11.22	0.398058	0.321168	0.183206	0.00110652	0.0342584
MMP9	20q13.12	0.417476	0.343066	0.221374	0.00481002	0.0692106
MOCS3	20q13.13	0.446602	0.350365	0.221374	0.00114422	0.0347253
MOGAT3	7q22.1	0.194175	0.408759	0.29771	0.00166154	0.0421451
MON2	12q14.1	0.223301	0.160584	0.0381679	0.00011224	0.0162045
MORC1	3q13.13	0.223301	0.131387	0.0687023	0.00268489	0.0516176
MORN3	12q24.31	0.194175	0.138686	0.0458015	0.00190482	0.0429139
MOSPD3	7q22.1	0.203883	0.394161	0.29771	0.00644866	0.0790893
MPHOSPH9	12q24.31	0.194175	0.131387	0.0381679	0.000823478	0.0291965
MR1	1q25.3	0.805825	0.627737	0.770992	0.00347897	0.0587395
MRGBP	20q13.33	0.427184	0.357664	0.229008	0.00432295	0.0656131
MROH8	20q11.23	0.407767	0.328467	0.198473	0.0019209	0.0429139
MRPL42	12q22	0.203883	0.167883	0.0534351	0.00174453	0.0421451
MRPS35	12p11.22	0.184466	0.109489	0.0458015	0.00313158	0.0550881
MRS2P2	12q21.1	0.223301	0.160584	0.0610687	0.00154039	0.0415881
MSI1	12q24.31	0.184466	0.138686	0.0458015	0.00327163	0.0559441
MSRB2	10p12.2	0.271845	0.20438	0.114504	0.00881805	0.0962399
MSRB3	12q14.3	0.203883	0.160584	0.0458015	0.000862856	0.0291965
MTERF2	12q23.3	0.223301	0.138686	0.0458015	0.000289403	0.0195615
MTG2	20q13.33	0.446602	0.364964	0.229008	0.00166576	0.0421451
MTRNR2L3	20q13.31	0.456311	0.343066	0.236641	0.0019388	0.0429139
MUC12	7q22.1	0.194175	0.40146	0.312977	0.00280129	0.0516176
MUC17	7q22.1	0.194175	0.408759	0.312977	0.0018879	0.0429139
MUC19	12q12	0.213592	0.124088	0.0381679	0.00019964	0.0190381
MUC3A	7q22.1	0.194175	0.40146	0.305344	0.0026967	0.0516176
MUCL1	12q13.2	0.213592	0.167883	0.0458015	0.000455887	0.022301
MVK	12q24.11	0.223301	0.145985	0.0534351	0.0007092	0.027297
MYBPC1	12q23.2	0.213592	0.167883	0.0381679	0.000178673	0.0180578
MYBPH	1q32.1	0.805825	0.635036	0.778626	0.00428251	0.0656131
MYF5	12q21.31	0.213592	0.167883	0.0687023	0.00498087	0.0693855
MYF6	12q21.31	0.213592	0.167883	0.0687023	0.00498087	0.0693855
MYH16	7q22.1	0.203883	0.394161	0.305344	0.00683044	0.0819424
MYH7B	20q11.22	0.407767	0.321168	0.19084	0.00120566	0.0356801
MYL10	7q22.1	0.194175	0.394161	0.29771	0.0037972	0.0625355
MYL2	12q24.11	0.213592	0.131387	0.0381679	0.000218585	0.0190381
MYL6	12q13.2	0.223301	0.153285	0.0610687	0.00157804	0.0415881
MYL6B	12q13.2	0.223301	0.153285	0.0610687	0.00157804	0.0415881
MYL9	20q11.23	0.417476	0.328467	0.183206	0.000381237	0.0205734
MYLK2	20q11.21	0.38835	0.328467	0.183206	0.00153853	0.0415881
MYO18A	17q11.2	0.359223	0.189781	0.221374	0.0073702	0.0864808
MYO1A	12q13.3	0.213592	0.145985	0.0610687	0.00282568	0.0516176
MYO1H	12q24.11	0.23301	0.153285	0.0534351	0.000382163	0.0205734
MYO3A	10p12.1	0.271845	0.19708	0.10687	0.00513637	0.0701862
MYOG	1q32.1	0.805825	0.635036	0.778626	0.00428251	0.0656131
MYRFL	12q15	0.23301	0.167883	0.0534351	0.000366659	0.0205734
MYT1	20q13.33	0.456311	0.379562	0.244275	0.00245976	0.050337
NAA25	12q24.13	0.213592	0.138686	0.0534351	0.00129549	0.0380234
NAB2	12q13.3	0.223301	0.145985	0.0534351	0.0007092	0.027297
NABP2	12q13.3	0.223301	0.153285	0.0534351	0.000713448	0.027297
NACA	12q13.3	0.223301	0.138686	0.0458015	0.000289403	0.0195615
NAP1L1	12q21.2	0.223301	0.160584	0.0610687	0.00154039	0.0415881
NAT16	7q22.1	0.194175	0.408759	0.29771	0.00166154	0.0421451
NAV1	1q32.1	0.796117	0.635036	0.778626	0.0062993	0.0779683
NAV3	12q21.2	0.213592	0.167883	0.0687023	0.00498087	0.0693855
NCF2	1q25.3	0.815534	0.635036	0.778626	0.00279312	0.0516176
NCKAP1L	12q13.13	0.213592	0.160584	0.0534351	0.00119859	0.0356801
NCKAP5L	12q13.12	0.223301	0.109489	0.0381679	6.20773e-05	0.0162045
NCOA3	20q13.12	0.436893	0.335766	0.221374	0.00203972	0.0440554
NCOA5	20q13.12	0.417476	0.343066	0.221374	0.00481002	0.0692106
NCOA6	20q11.22	0.398058	0.313869	0.198473	0.00347173	0.0587395
NCOR2	12q24.31	0.184466	0.131387	0.0381679	0.00149709	0.0415881
NDRG3	20q11.23	0.407767	0.328467	0.198473	0.0019209	0.0429139
NDUFA12	12q22	0.203883	0.160584	0.0458015	0.000862856	0.0291965
NDUFA4L2	12q13.3	0.223301	0.145985	0.0687023	0.00318803	0.055354
NEBL	10p12.31	0.281553	0.20438	0.122137	0.00931854	0.0984027
NEBL-AS1	10p12.31	0.281553	0.20438	0.122137	0.00931854	0.0984027
NEDD1	12q23.1	0.242718	0.175182	0.0458015	7.65389e-05	0.0162045
NEK7	1q31.3	0.834951	0.664234	0.770992	0.00811206	0.0927254
NELFCD	20q13.32	0.456311	0.357664	0.236641	0.00184893	0.0429139
NELL2	12q12	0.223301	0.124088	0.0381679	9.33257e-05	0.0162045
NEMP1	12q13.3	0.223301	0.145985	0.0534351	0.0007092	0.027297
NET1	10p15.1	0.291262	0.19708	0.122137	0.00541899	0.0719849
NEURL2	20q13.12	0.417476	0.343066	0.21374	0.00293636	0.0523415
NEUROD4	12q13.2	0.203883	0.167883	0.0458015	0.000746646	0.0283646
NFATC2	20q13.2	0.446602	0.350365	0.221374	0.00114422	0.0347253
NFE2	12q13.13	0.213592	0.145985	0.0610687	0.00282568	0.0516176
NFE4	7q22.1	0.203883	0.40146	0.29771	0.00435461	0.0656131
NFS1	20q11.22	0.407767	0.321168	0.175573	0.00037678	0.0205734
NFYB	12q23.3	0.223301	0.153285	0.0534351	0.000713448	0.027297
NINJ2	12p13.33	0.223301	0.160584	0.0763359	0.00632971	0.0779683
NKAIN3	8q12.3	0.631068	0.467153	0.435115	0.00718186	0.0844558
NKAIN4	20q13.33	0.436893	0.350365	0.236641	0.00487932	0.0692106
NKILA	20q13.31	0.456311	0.350365	0.236641	0.00191308	0.0429139
NLK	17q11.2	0.368932	0.19708	0.229008	0.00710645	0.0836149
NMNAT2	1q25.3	0.815534	0.635036	0.778626	0.00279312	0.0516176
NNAT	20q11.23	0.407767	0.328467	0.198473	0.0019209	0.0429139
NOC4L	12q24.33	0.194175	0.145985	0.0610687	0.00822398	0.0927254
NOL4L	20q11.21	0.38835	0.328467	0.19084	0.00267377	0.0516176
NORAD	20q11.23	0.407767	0.321168	0.175573	0.00037678	0.0205734
NOS1	12q24.22	0.223301	0.138686	0.0458015	0.000289403	0.0195615
NPBWR2	20q13.33	0.456311	0.372263	0.251908	0.00430445	0.0656131
NPEPL1	20q13.32	0.456311	0.357664	0.236641	0.00184893	0.0429139
NPFF	12q13.13	0.23301	0.131387	0.0458015	0.000126613	0.0165415
NPHS2	1q25.2	0.805825	0.635036	0.770992	0.0055155	0.0719849
NPL	1q25.3	0.815534	0.635036	0.778626	0.00279312	0.0516176
NR1H4	12q23.1	0.223301	0.182482	0.0687023	0.0024934	0.0507347
NR2C1	12q22	0.203883	0.167883	0.0458015	0.000746646	0.0283646
NR4A1	12q13.13	0.23301	0.116788	0.0458015	8.65524e-05	0.0162045
NR5A2	1q32.1	0.84466	0.656934	0.770992	0.00312431	0.0550881
NRAV	12q24.31	0.174757	0.138686	0.0458015	0.00535827	0.0719849
NRIP2	12p13.33	0.174757	0.116788	0.0458015	0.00625	0.0779683
NT5DC3	12q23.3	0.223301	0.145985	0.0687023	0.00318803	0.055354
NTF3	12p13.31	0.174757	0.109489	0.0458015	0.00598364	0.0760412
NTN4	12q22	0.213592	0.175182	0.0458015	0.000393488	0.0208685
NTS	12q21.31	0.203883	0.167883	0.0534351	0.00174453	0.0421451
NTSR1	20q13.33	0.436893	0.357664	0.229008	0.0028303	0.0516176
NUAK1	12q23.3	0.223301	0.145985	0.0610687	0.00155504	0.0415881
NUCKS1	1q32.1	0.805825	0.635036	0.755725	0.00840437	0.0937876
NUDT4	12q22	0.203883	0.167883	0.0534351	0.00174453	0.0421451
NUDT5	10p14	0.291262	0.182482	0.114504	0.00270759	0.0516176
NUP107	12q15	0.223301	0.160584	0.0687023	0.003221	0.0556521
NUP37	12q23.2	0.213592	0.145985	0.0381679	0.000228225	0.0190381
NXPH4	12q13.3	0.223301	0.145985	0.0687023	0.00318803	0.055354
NYAP1	7q22.1	0.203883	0.40146	0.29771	0.00435461	0.0656131
OAS1	12q24.13	0.223301	0.131387	0.0534351	0.000617787	0.0272526
OAS2	12q24.13	0.223301	0.131387	0.0534351	0.000617787	0.0272526
OAS3	12q24.13	0.223301	0.131387	0.0534351	0.000617787	0.0272526
OASL	12q24.31	0.194175	0.138686	0.0534351	0.00419545	0.0656131
OCLM	1q31.1	0.805825	0.635036	0.770992	0.0055155	0.0719849
OCSTAMP	20q13.12	0.427184	0.335766	0.229008	0.0052491	0.0713624
OGFOD2	12q24.31	0.194175	0.138686	0.0381679	0.000799171	0.0291965
OGFR	20q13.33	0.427184	0.357664	0.229008	0.00432295	0.0656131
OGFR-AS1	20q13.33	0.427184	0.357664	0.229008	0.00432295	0.0656131
OLR1	12p13.2	0.165049	0.10219	0.0381679	0.00484298	0.0692106
OPRL1	20q13.33	0.456311	0.372263	0.251908	0.00430445	0.0656131
OPTN	10p13	0.291262	0.189781	0.129771	0.00830488	0.0929193
OR10A7	12q13.2	0.203883	0.160584	0.0458015	0.000862856	0.0291965
OR10AD1	12q13.11	0.213592	0.131387	0.0305344	8.17077e-05	0.0162045
OR10P1	12q13.2	0.213592	0.167883	0.0534351	0.00108209	0.0340454
OR2AE1	7q22.1	0.213592	0.40146	0.320611	0.00854547	0.0948936
OR2AP1	12q13.2	0.213592	0.167883	0.0534351	0.00108209	0.0340454
OR6C1	12q13.2	0.213592	0.167883	0.0458015	0.000455887	0.022301
OR6C2	12q13.2	0.213592	0.153285	0.0458015	0.00054913	0.025985
OR6C3	12q13.2	0.213592	0.167883	0.0458015	0.000455887	0.022301
OR6C4	12q13.2	0.213592	0.153285	0.0458015	0.00054913	0.025985
OR6C6	12q13.2	0.203883	0.167883	0.0458015	0.000746646	0.0283646
OR6C65	12q13.2	0.213592	0.167883	0.0458015	0.000455887	0.022301
OR6C68	12q13.2	0.213592	0.153285	0.0458015	0.00054913	0.025985
OR6C70	12q13.2	0.213592	0.153285	0.0458015	0.00054913	0.025985
OR6C74	12q13.2	0.203883	0.160584	0.0458015	0.000862856	0.0291965
OR6C75	12q13.2	0.213592	0.167883	0.0458015	0.000455887	0.022301
OR6C76	12q13.2	0.213592	0.153285	0.0458015	0.00054913	0.025985
OR7E47P	12q13.13	0.23301	0.116788	0.0458015	8.65524e-05	0.0162045
OR8S1	12q13.11	0.213592	0.116788	0.0381679	0.000173483	0.0180439
OR9K2	12q13.2	0.203883	0.160584	0.0458015	0.000862856	0.0291965
ORAI1	12q24.31	0.194175	0.138686	0.0458015	0.00190482	0.0429139
ORAI2	7q22.1	0.194175	0.394161	0.305344	0.00398422	0.063611
ORMDL2	12q13.2	0.213592	0.167883	0.0610687	0.00239834	0.049127
OSBPL2	20q13.33	0.436893	0.364964	0.229008	0.00258176	0.0514594
OSBPL8	12q21.2	0.223301	0.145985	0.0610687	0.00155504	0.0415881
OSER1	20q13.12	0.407767	0.343066	0.21374	0.004458	0.0667952
OSER1-AS1	20q13.12	0.407767	0.343066	0.21374	0.004458	0.0667952
OTOGL	12q21.31	0.213592	0.167883	0.0610687	0.00239834	0.049127
OTUD1	10p12.2	0.271845	0.20438	0.114504	0.00881805	0.0962399
OVAAL	1q25.3	0.805825	0.635036	0.770992	0.0055155	0.0719849
OVCH1	12p11.22	0.194175	0.116788	0.0458015	0.00177104	0.0423507
OVCH1-AS1	12p11.22	0.194175	0.116788	0.0458015	0.00177104	0.0423507
P2RX2	12q24.33	0.194175	0.145985	0.0534351	0.00397602	0.063611
P2RX4	12q24.31	0.194175	0.138686	0.0534351	0.00419545	0.0656131
P2RX7	12q24.31	0.194175	0.138686	0.0534351	0.00419545	0.0656131
PA2G4	12q13.2	0.223301	0.160584	0.0687023	0.003221	0.0556521
PABPC1L	20q13.12	0.417476	0.350365	0.206107	0.00156283	0.0415881
PACERR	1q31.1	0.805825	0.635036	0.770992	0.0055155	0.0719849
PAH	12q23.2	0.223301	0.145985	0.0534351	0.0007092	0.027297
PAN2	12q13.3	0.23301	0.153285	0.0458015	0.000158277	0.0170415
PARD6B	20q13.13	0.436893	0.350365	0.206107	0.000625529	0.027297
PARPBP	12q23.2	0.213592	0.145985	0.0381679	0.000228225	0.0190381
PAWR	12q21.2	0.213592	0.167883	0.0610687	0.00239834	0.049127
PCAT6	1q32.1	0.805825	0.635036	0.778626	0.00428251	0.0656131
PCBP2	12q13.13	0.23301	0.138686	0.0458015	0.000142507	0.0170415
PCBP2-OT1	12q13.13	0.23301	0.131387	0.0458015	0.000126613	0.0165415
PCED1B	12q13.11	0.213592	0.138686	0.0381679	0.000228357	0.0190381
PCED1B-AS1	12q13.11	0.213592	0.138686	0.0381679	0.000228357	0.0190381
PCIF1	20q13.12	0.417476	0.343066	0.221374	0.00481002	0.0692106
PCK1	20q13.31	0.466019	0.357664	0.244275	0.00184014	0.0429139
PCMTD2	20q13.33	0.446602	0.386861	0.236641	0.0019934	0.0434445
PCOLCE	7q22.1	0.203883	0.394161	0.29771	0.00644866	0.0790893
PCOLCE-AS1	7q22.1	0.203883	0.40146	0.29771	0.00435461	0.0656131
PDAP1	7q22.1	0.194175	0.394161	0.305344	0.00398422	0.063611
PDC	1q31.1	0.805825	0.635036	0.770992	0.0055155	0.0719849
PDE1B	12q13.2	0.213592	0.160584	0.0534351	0.00119859	0.0356801
PDE3A	12p12.2	0.174757	0.124088	0.0381679	0.00276487	0.0516176
PDE6H	12p12.3	0.15534	0.109489	0.0381679	0.00900593	0.0962399
PDRG1	20q11.21	0.378641	0.328467	0.183206	0.00230916	0.0484555
PDSS1	10p12.1	0.281553	0.19708	0.114504	0.00539723	0.0719849
PDZRN4	12q12	0.223301	0.124088	0.0305344	3.43084e-05	0.0162045
PEBP1	12q24.23	0.213592	0.138686	0.0381679	0.000228357	0.0190381
PFDN4	20q13.2	0.446602	0.372263	0.236641	0.00252585	0.0512004
PFDN5	12q13.13	0.223301	0.131387	0.0458015	0.000265989	0.0195615
PFKM	12q13.11	0.213592	0.131387	0.0305344	8.17077e-05	0.0162045
PGAM1P5	12q22	0.213592	0.175182	0.0458015	0.000393488	0.0208685
PGAM5	12q24.33	0.194175	0.145985	0.0534351	0.00397602	0.063611
PHACTR3	20q13.32	0.456311	0.350365	0.221374	0.000690241	0.027297
PHF20	20q11.22	0.407767	0.321168	0.175573	0.00037678	0.0205734
PHLDA1	12q21.2	0.223301	0.160584	0.0610687	0.00154039	0.0415881
PHLDA3	1q32.1	0.796117	0.635036	0.770992	0.00818812	0.0927254
PHYH	10p13	0.300971	0.182482	0.122137	0.00250736	0.0509219
PI3	20q13.12	0.417476	0.343066	0.21374	0.00293636	0.0523415
PIGS	17q11.2	0.349515	0.189781	0.206107	0.00867439	0.095494
PIGT	20q13.12	0.417476	0.343066	0.206107	0.0017435	0.0421451
PIGU	20q11.22	0.38835	0.321168	0.206107	0.00809116	0.0927254
PIK3CG	7q22.3	0.213592	0.40146	0.312977	0.00826457	0.0927589
PILRA	7q22.1	0.203883	0.40146	0.305344	0.00467645	0.0685815
PILRB	7q22.1	0.203883	0.394161	0.305344	0.00683044	0.0819424
PIPOX	17q11.2	0.359223	0.189781	0.229008	0.00868208	0.095494
PITPNM2	12q24.31	0.194175	0.138686	0.0381679	0.000799171	0.0291965
PKIG	20q13.12	0.407767	0.350365	0.221374	0.0065091	0.0797849
PKP1	1q32.1	0.805825	0.635036	0.770992	0.0055155	0.0719849
PKP2	12p11.21	0.203883	0.116788	0.0534351	0.00193764	0.0429139
PLA2G1B	12q24.31	0.184466	0.138686	0.0458015	0.00327163	0.0559441
PLA2G4A	1q31.1	0.805825	0.635036	0.770992	0.0055155	0.0719849
PLAGL2	20q11.21	0.378641	0.328467	0.183206	0.00230916	0.0484555
PLBD1	12p13.1	0.15534	0.10219	0.0381679	0.00899397	0.0962399
PLBD1-AS1	12p13.1	0.15534	0.10219	0.0381679	0.00899397	0.0962399
PLBD2	12q24.13	0.223301	0.138686	0.0458015	0.000289403	0.0195615
PLCG1	20q12	0.427184	0.343066	0.21374	0.00187915	0.0429139
PLCG1-AS1	20q12	0.417476	0.343066	0.21374	0.00293636	0.0523415
PLEKHA8P1	12q12	0.223301	0.116788	0.0381679	7.81733e-05	0.0162045
PLEKHG7	12q22	0.223301	0.160584	0.0534351	0.000690084	0.027297
PLOD3	7q22.1	0.194175	0.408759	0.29771	0.00166154	0.0421451
PLTP	20q13.12	0.417476	0.343066	0.221374	0.00481002	0.0692106
PLXNC1	12q22	0.203883	0.160584	0.0458015	0.000862856	0.0291965
PM20D1	1q32.1	0.805825	0.635036	0.755725	0.00840437	0.0937876
PMCH	12q23.2	0.213592	0.145985	0.0381679	0.000228225	0.0190381
PMEL	12q13.2	0.223301	0.160584	0.0610687	0.00154039	0.0415881
PMEPA1	20q13.31	0.456311	0.357664	0.236641	0.00184893	0.0429139
PMS2P1	7q22.1	0.203883	0.394161	0.305344	0.00683044	0.0819424
POC1B	12q21.33	0.223301	0.153285	0.0534351	0.000713448	0.027297
POC1B-GALNT4	12q21.33	0.213592	0.153285	0.0534351	0.00127953	0.0377101
POFUT1	20q11.21	0.378641	0.328467	0.183206	0.00230916	0.0484555
POLE	12q24.33	0.194175	0.145985	0.0534351	0.00397602	0.063611
POLR2J	7q22.1	0.194175	0.394161	0.305344	0.00398422	0.063611
POLR2J2	7q22.1	0.194175	0.394161	0.305344	0.00398422	0.063611
POLR2J3	7q22.1	0.194175	0.394161	0.305344	0.00398422	0.063611
POLR3B	12q23.3	0.23301	0.138686	0.0534351	0.000339736	0.0205734
POP5	12q24.31	0.174757	0.138686	0.0381679	0.00233389	0.0485494
POP7	7q22.1	0.203883	0.40146	0.312977	0.00490347	0.0692106
POU6F1	12q13.13	0.252427	0.116788	0.0458015	1.54063e-05	0.0162045
PPDPF	20q13.33	0.436893	0.357664	0.236641	0.00458874	0.0679933
PPFIA2	12q21.31	0.203883	0.167883	0.0687023	0.00776457	0.0898778
PPFIA4	1q32.1	0.805825	0.635036	0.778626	0.00428251	0.0656131
PPFIBP1	12p11.23	0.203883	0.109489	0.0687023	0.00618733	0.0779683
PPHLN1	12q12	0.223301	0.116788	0.0305344	2.87746e-05	0.0162045
PPM1H	12q14.1	0.223301	0.160584	0.0381679	0.00011224	0.0162045
PPP1CC	12q24.11	0.213592	0.138686	0.0458015	0.00056531	0.025985
PPP1R12A	12q21.2	0.213592	0.167883	0.0610687	0.00239834	0.049127
PPP1R12B	1q32.1	0.796117	0.635036	0.770992	0.00818812	0.0927254
PPP1R16B	20q11.23	0.427184	0.321168	0.221374	0.003437	0.0583528
PPP1R1A	12q13.2	0.213592	0.160584	0.0534351	0.00119859	0.0356801
PPP1R35	7q22.1	0.203883	0.40146	0.29771	0.00435461	0.0656131
PPP1R3D	20q13.33	0.456311	0.350365	0.221374	0.000690241	0.027297
PPP1R42	8q13.1	0.660194	0.481752	0.458015	0.00424735	0.0656131
PPP4R1L	20q13.32	0.456311	0.343066	0.236641	0.0019388	0.0429139
PPTC7	12q24.11	0.223301	0.138686	0.0610687	0.00147115	0.0415881
PPY2P	17q11.2	0.368932	0.19708	0.221374	0.00587289	0.0750343
PRB1	12p13.2	0.271845	0.160584	0.114504	0.00609781	0.0774003
PRDM4	12q23.3	0.223301	0.138686	0.0381679	0.000114708	0.0162045
PRELID3B	20q13.32	0.456311	0.364964	0.236641	0.00175064	0.0421451
PREX1	20q13.13	0.427184	0.350365	0.21374	0.00172608	0.0421451
PRG4	1q31.1	0.805825	0.635036	0.770992	0.0055155	0.0719849
PRICKLE1	12q12	0.223301	0.116788	0.0305344	2.87746e-05	0.0162045
PRIM1	12q13.3	0.223301	0.138686	0.0458015	0.000289403	0.0195615
PRKAB1	12q24.23	0.203883	0.138686	0.0534351	0.00238178	0.049127
PRKAG1	12q13.12	0.213592	0.124088	0.0610687	0.00231354	0.0484555
PRKAR2B	7q22.3	0.213592	0.40146	0.312977	0.00826457	0.0927589
PRKCQ	10p15.1	0.281553	0.19708	0.122137	0.00917869	0.0975993
PRKCQ-AS1	10p15.1	0.281553	0.19708	0.122137	0.00917869	0.0975993
PRKG1	10q11.23	0.223301	0.145985	0.0763359	0.00613218	0.0776984
PRKRIP1	7q22.1	0.194175	0.394161	0.305344	0.00398422	0.063611
PROCR	20q11.22	0.417476	0.321168	0.183206	0.000411102	0.0215889
PRPF18	10p13	0.291262	0.189781	0.122137	0.00506537	0.0697314
PRPF40B	12q13.12	0.223301	0.109489	0.0381679	6.20773e-05	0.0162045
PRPF6	20q13.33	0.456311	0.372263	0.259542	0.00674645	0.0819424
PRPH	12q13.12	0.213592	0.109489	0.0534351	0.000776415	0.0289817
PRR13	12q13.13	0.23301	0.131387	0.0458015	0.000126613	0.0165415
PRR4	12p13.2	0.174757	0.10219	0.0458015	0.00543344	0.0719849
PRTFDC1	10p12.1	0.281553	0.19708	0.122137	0.00917869	0.0975993
PSMA7	20q13.33	0.446602	0.364964	0.229008	0.00166576	0.0421451
PTCD1	7q22.1	0.203883	0.394161	0.305344	0.00683044	0.0819424
PTCHD3	10p12.1	0.271845	0.189781	0.114504	0.00887193	0.0962399
PTF1A	10p12.2	0.271845	0.20438	0.114504	0.00881805	0.0962399
PTGES3	12q13.3	0.223301	0.145985	0.0458015	0.000301283	0.0195615
PTGIS	20q13.13	0.427184	0.357664	0.221374	0.00262642	0.0516176
PTGS2	1q31.1	0.805825	0.635036	0.770992	0.0055155	0.0719849
PTHLH	12p11.22	0.184466	0.109489	0.0381679	0.00138544	0.039632
PTK6	20q13.33	0.436893	0.357664	0.236641	0.00458874	0.0679933
PTPN1	20q13.13	0.427184	0.364964	0.21374	0.00136926	0.039274
PTPN11	12q24.13	0.223301	0.131387	0.0534351	0.000617787	0.0272526
PTPN7	1q32.1	0.796117	0.635036	0.770992	0.00818812	0.0927254
PTPRB	12q15	0.223301	0.160584	0.0534351	0.000690084	0.027297
PTPRC	1q31.3	0.834951	0.664234	0.770992	0.00811206	0.0927254
PTPRQ	12q21.31	0.213592	0.167883	0.0687023	0.00498087	0.0693855
PTPRR	12q15	0.23301	0.160584	0.0534351	0.000381489	0.0205734
PTPRVP	1q32.1	0.796117	0.635036	0.770992	0.00818812	0.0927254
PUS1	12q24.33	0.194175	0.153285	0.0610687	0.00757977	0.0878811
PUS7	7q22.3	0.223301	0.408759	0.312977	0.00935933	0.0987847
PUS7L	12q12	0.223301	0.116788	0.0381679	7.81733e-05	0.0162045
PVRIG	7q22.1	0.203883	0.394161	0.305344	0.00683044	0.0819424
PVRIG2P	7q22.1	0.203883	0.394161	0.305344	0.00683044	0.0819424
PWP1	12q23.3	0.223301	0.138686	0.0458015	0.000289403	0.0195615
PXMP2	12q24.33	0.194175	0.145985	0.0534351	0.00397602	0.063611
PXN	12q24.23	0.184466	0.138686	0.0458015	0.00327163	0.0559441
PXN-AS1	12q24.23	0.174757	0.138686	0.0458015	0.00535827	0.0719849
PYM1	12q13.2	0.223301	0.175182	0.0687023	0.00280969	0.0516176
PYROXD1	12p12.1	0.174757	0.116788	0.0381679	0.00280847	0.0516176
PYY2	17q11.2	0.368932	0.19708	0.221374	0.00587289	0.0750343
QSOX1	1q25.2	0.815534	0.635036	0.770992	0.00356509	0.05948
R3HDM2	12q13.3	0.23301	0.145985	0.0839695	0.00624316	0.0779683
RAB18	10p12.1	0.271845	0.189781	0.114504	0.00887193	0.0962399
RAB21	12q21.1	0.223301	0.160584	0.0610687	0.00154039	0.0415881
RAB22A	20q13.32	0.456311	0.350365	0.236641	0.00191308	0.0429139
RAB29	1q32.1	0.805825	0.635036	0.755725	0.00840437	0.0937876
RAB35	12q24.23	0.194175	0.138686	0.0458015	0.00190482	0.0429139
RAB3IP	12q15	0.23301	0.167883	0.0534351	0.000366659	0.0205734
RAB5B	12q13.2	0.23301	0.160584	0.0687023	0.00184539	0.0429139
RABIF	1q32.1	0.805825	0.635036	0.778626	0.00428251	0.0656131
RACGAP1	12q13.12	0.223301	0.116788	0.0381679	7.81733e-05	0.0162045
RACGAP1P	12q12	0.223301	0.116788	0.0381679	7.81733e-05	0.0162045
RAD9B	12q24.11	0.223301	0.138686	0.0458015	0.000289403	0.0195615
RAE1	20q13.31	0.456311	0.343066	0.236641	0.0019388	0.0429139
RALGAPB	20q11.23	0.407767	0.321168	0.206107	0.00342556	0.0582508
RALGPS2	1q25.2	0.815534	0.642336	0.770992	0.0056264	0.0727849
RAP1B	12q15	0.213592	0.160584	0.0610687	0.00262897	0.0516176
RAPGEF3	12q13.11	0.223301	0.131387	0.0381679	0.000105951	0.0162045
RARG	12q13.13	0.223301	0.131387	0.0381679	0.000105951	0.0162045
RASA4	7q22.1	0.194175	0.394161	0.305344	0.00398422	0.063611
RASA4B	7q22.1	0.194175	0.394161	0.305344	0.00398422	0.063611
RASAL1	12q24.13	0.223301	0.131387	0.0458015	0.000265989	0.0195615
RASAL2	1q25.2	0.805825	0.642336	0.778626	0.00676669	0.0819424
RASAL2-AS1	1q25.2	0.805825	0.642336	0.778626	0.00676669	0.0819424
RASGEF1A	10q11.21	0.223301	0.145985	0.0763359	0.00613218	0.0776984
RASSF3	12q14.2	0.203883	0.160584	0.0610687	0.00430061	0.0656131
RASSF4	10q11.21	0.203883	0.131387	0.0687023	0.00926763	0.0980584
RASSF8	12p12.1	0.194175	0.10219	0.0305344	0.000225355	0.0190381
RASSF8-AS1	12p12.1	0.194175	0.10219	0.0305344	0.000225355	0.0190381
RASSF9	12q21.31	0.203883	0.167883	0.0534351	0.00174453	0.0421451
RBBP8NL	20q13.33	0.436893	0.364964	0.229008	0.00258176	0.0514594
RBL1	20q11.23	0.407767	0.343066	0.206107	0.00267804	0.0516176
RBM12	20q11.22	0.407767	0.321168	0.175573	0.00037678	0.0205734
RBM19	12q24.13	0.23301	0.145985	0.0687023	0.00172034	0.0421451
RBM38	20q13.31	0.456311	0.350365	0.236641	0.00191308	0.0429139
RBM39	20q11.22	0.407767	0.321168	0.175573	0.00037678	0.0205734
RBMS2	12q13.3	0.23301	0.145985	0.0381679	5.93808e-05	0.0162045
RBP3	10q11.22	0.223301	0.131387	0.0839695	0.00897212	0.0962399
RBPJL	20q13.12	0.417476	0.343066	0.21374	0.00293636	0.0523415
RDH16	12q13.3	0.223301	0.153285	0.0763359	0.00634998	0.0779683
RDH5	12q13.2	0.213592	0.167883	0.0534351	0.00108209	0.0340454
RECQL	12p12.1	0.174757	0.116788	0.0381679	0.00280847	0.0516176
REM1	20q11.21	0.417476	0.335766	0.206107	0.00190494	0.0429139
REP15	12p11.22	0.184466	0.109489	0.0458015	0.00313158	0.0550881
RERG	12p12.3	0.15534	0.10219	0.0381679	0.00899397	0.0962399
RERG-AS1	12p12.3	0.15534	0.10219	0.0381679	0.00899397	0.0962399
RET	10q11.21	0.223301	0.138686	0.0763359	0.00569004	0.0727849
RFC5	12q24.23	0.223301	0.138686	0.0381679	0.000114708	0.0162045
RFLNA	12q24.31	0.184466	0.138686	0.0381679	0.00139869	0.0396933
RFX4	12q23.3	0.223301	0.138686	0.0458015	0.000289403	0.0195615
RGL1	1q25.3	0.815534	0.635036	0.778626	0.00279312	0.0516176
RGS1	1q31.2	0.825243	0.649635	0.78626	0.00357835	0.05948
RGS13	1q31.2	0.825243	0.649635	0.78626	0.00357835	0.05948
RGS16	1q25.3	0.815534	0.627737	0.778626	0.00171274	0.0421451
RGS18	1q31.2	0.825243	0.649635	0.78626	0.00357835	0.05948
RGS19	20q13.33	0.456311	0.372263	0.251908	0.00430445	0.0656131
RGS2	1q31.2	0.825243	0.635036	0.78626	0.00134008	0.0385402
RGS21	1q31.2	0.825243	0.649635	0.78626	0.00357835	0.05948
RGS8	1q25.3	0.815534	0.627737	0.778626	0.00171274	0.0421451
RGSL1	1q25.3	0.815534	0.627737	0.778626	0.00171274	0.0421451
RHEBL1	12q13.12	0.213592	0.116788	0.0534351	0.00094976	0.0314522
RIC8B	12q23.3	0.223301	0.138686	0.0458015	0.000289403	0.0195615
RILPL1	12q24.31	0.194175	0.131387	0.0381679	0.000823478	0.0291965
RILPL2	12q24.31	0.184466	0.131387	0.0381679	0.00149709	0.0415881
RIMS4	20q13.12	0.417476	0.350365	0.206107	0.00156283	0.0415881
RITA1	12q24.13	0.223301	0.131387	0.0458015	0.000265989	0.0195615
RMST	12q23.1	0.223301	0.175182	0.0458015	0.000237573	0.0192084
RNASEL	1q25.3	0.815534	0.627737	0.778626	0.00171274	0.0421451
RND1	12q13.12	0.213592	0.131387	0.0687023	0.00509008	0.0697314
RNF10	12q24.31	0.174757	0.138686	0.0381679	0.00233389	0.0485494
RNF114	20q13.13	0.436893	0.343066	0.206107	0.000677966	0.027297
RNF2	1q25.3	0.815534	0.635036	0.778626	0.00279312	0.0516176
RNF34	12q24.31	0.194175	0.138686	0.0458015	0.00190482	0.0429139
RNF41	12q13.3	0.223301	0.160584	0.0610687	0.00154039	0.0415881
RNFT2	12q24.22	0.223301	0.131387	0.0534351	0.000617787	0.0272526
RNPEP	1q32.1	0.796117	0.635036	0.778626	0.0062993	0.0779683
RNU4-1	12q24.23	0.184466	0.138686	0.0458015	0.00327163	0.0559441
RNU4-2	12q24.23	0.184466	0.138686	0.0458015	0.00327163	0.0559441
RNU6-1|chr10	10p13	0.300971	0.182482	0.129771	0.00414105	0.0656131
RNU6-2|chr10	10p13	0.300971	0.182482	0.129771	0.00414105	0.0656131
RNU6-7|chr10	10p13	0.300971	0.182482	0.129771	0.00414105	0.0656131
ROMO1	20q11.22	0.407767	0.321168	0.175573	0.00037678	0.0205734
RPAP3	12q13.11	0.223301	0.131387	0.0381679	0.000105951	0.0162045
RPH3A	12q24.13	0.223301	0.131387	0.0534351	0.000617787	0.0272526
RPL13AP20	12p13.1	0.15534	0.10219	0.0381679	0.00899397	0.0962399
RPL41	12q13.2	0.223301	0.160584	0.0687023	0.003221	0.0556521
RPL6	12q24.13	0.223301	0.131387	0.0534351	0.000617787	0.0272526
RPLP0	12q24.23	0.174757	0.138686	0.0458015	0.00535827	0.0719849
RPN2	20q11.23	0.407767	0.328467	0.198473	0.0019209	0.0429139
RPRD1B	20q11.23	0.407767	0.321168	0.21374	0.00553006	0.0719849
RPS10P7	1q32.1	0.796117	0.635036	0.770992	0.00818812	0.0927254
RPS21	20q13.33	0.436893	0.364964	0.229008	0.00258176	0.0514594
RPS26	12q13.2	0.23301	0.160584	0.0687023	0.00184539	0.0429139
RPSAP52	12q14.3	0.203883	0.160584	0.0458015	0.000862856	0.0291965
RRS1-AS1	8q13.1	0.650485	0.481752	0.458015	0.00727774	0.0854895
RTEL1	20q13.33	0.456311	0.386861	0.267176	0.00906442	0.096576
RTEL1-TNFRSF6B	20q13.33	0.456311	0.386861	0.267176	0.00906442	0.096576
RTFDC1	20q13.31	0.427184	0.357664	0.221374	0.00262642	0.0516176
SALL4	20q13.2	0.446602	0.357664	0.21374	0.000618162	0.0272526
SAMD10	20q13.33	0.456311	0.372263	0.259542	0.00674645	0.0819424
SAMHD1	20q11.23	0.407767	0.343066	0.206107	0.00267804	0.0516176
SAP25	7q22.1	0.203883	0.40146	0.29771	0.00435461	0.0656131
SARNP	12q13.2	0.213592	0.167883	0.0610687	0.00239834	0.049127
SART3	12q23.3	0.223301	0.153285	0.0381679	0.000117796	0.0162045
SBNO1	12q24.31	0.184466	0.131387	0.0381679	0.00149709	0.0415881
SCAF11	12q12	0.213592	0.116788	0.0305344	6.52312e-05	0.0162045
SCAND1	20q11.23	0.407767	0.321168	0.175573	0.00037678	0.0205734
SCARB1	12q24.31	0.194175	0.138686	0.0381679	0.000799171	0.0291965
SCARNA18B	1q31.2	0.825243	0.635036	0.778626	0.00174611	0.0421451
SCN8A	12q13.13	0.242718	0.116788	0.0458015	3.71303e-05	0.0162045
SCYL2	12q23.1	0.223301	0.189781	0.0687023	0.00214264	0.0457253
SDC4	20q13.12	0.417476	0.343066	0.21374	0.00293636	0.0523415
SDR9C7	12q13.3	0.223301	0.153285	0.0687023	0.00326666	0.0559441
SDS	12q24.13	0.223301	0.138686	0.0458015	0.000289403	0.0195615
SDSL	12q24.13	0.223301	0.138686	0.0458015	0.000289403	0.0195615
SEC61A2	10p14	0.291262	0.182482	0.122137	0.00458716	0.0679933
SELPLG	12q24.11	0.223301	0.145985	0.0381679	0.000118739	0.0162045
SEMG1	20q13.12	0.417476	0.343066	0.21374	0.00293636	0.0523415
SEMG2	20q13.12	0.417476	0.343066	0.21374	0.00293636	0.0523415
SENP1	12q13.11	0.213592	0.131387	0.0381679	0.000218585	0.0190381
SEPHS1	10p13	0.300971	0.182482	0.122137	0.00250736	0.0509219
SERPINE1	7q22.1	0.194175	0.408759	0.29771	0.00166154	0.0421451
SFMBT2	10p14	0.291262	0.19708	0.122137	0.00541899	0.0719849
SFSWAP	12q24.33	0.194175	0.153285	0.0610687	0.00757977	0.0878811
SFTA1P	10p14	0.281553	0.182482	0.122137	0.00811811	0.0927254
SH2B2	7q22.1	0.194175	0.394161	0.305344	0.00398422	0.063611
SH2B3	12q24.12	0.213592	0.131387	0.0381679	0.000218585	0.0190381
SHCBP1L	1q25.3	0.815534	0.635036	0.778626	0.00279312	0.0516176
SHISA4	1q32.1	0.796117	0.635036	0.778626	0.0062993	0.0779683
SHMT2	12q13.3	0.223301	0.145985	0.0687023	0.00318803	0.055354
SIRT4	12q24.31	0.184466	0.138686	0.0458015	0.00327163	0.0559441
SLA2	20q11.23	0.417476	0.328467	0.19084	0.000686426	0.027297
SLC11A2	12q13.12	0.252427	0.116788	0.0610687	8.65335e-05	0.0162045
SLC12A5	20q13.12	0.417476	0.343066	0.221374	0.00481002	0.0692106
SLC12A9	7q22.1	0.203883	0.40146	0.305344	0.00467645	0.0685815
SLC13A2	17q11.2	0.349515	0.189781	0.206107	0.00867439	0.095494
SLC13A3	20q13.12	0.427184	0.335766	0.229008	0.0052491	0.0713624
SLC15A4	12q24.33	0.184466	0.131387	0.0534351	0.00740703	0.0864867
SLC16A7	12q14.1	0.23301	0.182482	0.0458015	0.000122156	0.0165415
SLC17A8	12q23.1	0.223301	0.189781	0.0763359	0.00440889	0.0663377
SLC17A9	20q13.33	0.427184	0.364964	0.229008	0.00388925	0.063611
SLC25A3	12q23.1	0.213592	0.167883	0.0458015	0.000455887	0.022301
SLC2A10	20q13.12	0.427184	0.335766	0.221374	0.00328753	0.0561712
SLC2A13	12q12	0.213592	0.124088	0.0381679	0.00019964	0.0190381
SLC32A1	20q11.23	0.407767	0.321168	0.221374	0.00868016	0.095494
SLC35C2	20q13.12	0.417476	0.343066	0.221374	0.00481002	0.0692106
SLC35E3	12q15	0.223301	0.167883	0.0687023	0.00306155	0.0540336
SLC38A1	12q13.11	0.223301	0.116788	0.0305344	2.87746e-05	0.0162045
SLC38A2	12q13.11	0.223301	0.116788	0.0305344	2.87746e-05	0.0162045
SLC38A4	12q13.11	0.213592	0.131387	0.0381679	0.000218585	0.0190381
SLC39A5	12q13.3	0.223301	0.153285	0.0534351	0.000713448	0.027297
SLC41A1	1q32.1	0.805825	0.635036	0.755725	0.00840437	0.0937876
SLC41A2	12q23.3	0.223301	0.145985	0.0534351	0.0007092	0.027297
SLC48A1	12q13.11	0.223301	0.131387	0.0381679	0.000105951	0.0162045
SLC4A8	12q13.13	0.242718	0.116788	0.0458015	3.71303e-05	0.0162045
SLC5A8	12q23.1	0.203883	0.167883	0.0381679	0.00029702	0.0195615
SLC6A15	12q21.31	0.223301	0.167883	0.0534351	0.000642977	0.027297
SLC8B1	12q24.13	0.223301	0.131387	0.0458015	0.000265989	0.0195615
SLC9A7P1	12q23.1	0.213592	0.175182	0.0458015	0.000393488	0.0208685
SLC9A8	20q13.13	0.446602	0.357664	0.206107	0.000347648	0.0205734
SLCO1A2	12p12.1	0.174757	0.116788	0.0381679	0.00280847	0.0516176
SLCO1B1	12p12.1	0.174757	0.116788	0.0381679	0.00280847	0.0516176
SLCO1B3	12p12.2	0.174757	0.124088	0.0381679	0.00276487	0.0516176
SLCO1B7	12p12.2	0.174757	0.116788	0.0381679	0.00280847	0.0516176
SLCO1C1	12p12.2	0.174757	0.116788	0.0381679	0.00280847	0.0516176
SLCO4A1	20q13.33	0.436893	0.357664	0.229008	0.0028303	0.0516176
SLCO4A1-AS1	20q13.33	0.436893	0.357664	0.229008	0.0028303	0.0516176
SLMO2-ATP5E	20q13.32	0.456311	0.364964	0.236641	0.00175064	0.0421451
SLPI	20q13.12	0.417476	0.343066	0.21374	0.00293636	0.0523415
SMAGP	12q13.13	0.252427	0.116788	0.0458015	1.54063e-05	0.0162045
SMARCC2	12q13.2	0.213592	0.153285	0.0610687	0.00277833	0.0516176
SMARCD1	12q13.12	0.223301	0.116788	0.0381679	7.81733e-05	0.0162045
SMCO2	12p11.23	0.194175	0.109489	0.0610687	0.00654806	0.0802166
SMG7	1q25.3	0.815534	0.635036	0.778626	0.00279312	0.0516176
SMG7-AS1	1q25.3	0.815534	0.635036	0.778626	0.00279312	0.0516176
SMUG1	12q13.13	0.213592	0.145985	0.0534351	0.00131401	0.0381448
SNAI1	20q13.13	0.427184	0.350365	0.206107	0.00100297	0.0329595
SNHG11	20q11.23	0.407767	0.321168	0.198473	0.00206209	0.0441382
SNHG17	20q11.23	0.407767	0.321168	0.21374	0.00553006	0.0719849
SNHG6	8q13.1	0.660194	0.481752	0.458015	0.00424735	0.0656131
SNORA105C	12q13.3	0.23301	0.145985	0.0381679	5.93808e-05	0.0162045
SNORA2A	12q13.11	0.213592	0.116788	0.0381679	0.000173483	0.0180439
SNORA2B	12q13.11	0.213592	0.116788	0.0381679	0.000173483	0.0180439
SNORA2C	12q13.11	0.213592	0.116788	0.0381679	0.000173483	0.0180439
SNORA53	12q23.1	0.213592	0.167883	0.0458015	0.000455887	0.022301
SNORA60	20q11.23	0.407767	0.321168	0.198473	0.00206209	0.0441382
SNORA70G	12q15	0.213592	0.160584	0.0534351	0.00119859	0.0356801
SNORA71A	20q11.23	0.407767	0.321168	0.21374	0.00553006	0.0719849
SNORA71B	20q11.23	0.407767	0.321168	0.21374	0.00553006	0.0719849
SNORA71C	20q11.23	0.407767	0.321168	0.21374	0.00553006	0.0719849
SNORA71D	20q11.23	0.407767	0.321168	0.21374	0.00553006	0.0719849
SNORA71E	20q11.23	0.407767	0.321168	0.198473	0.00206209	0.0441382
SNORD12	20q13.13	0.417476	0.343066	0.221374	0.00481002	0.0692106
SNORD129	10p14	0.281553	0.182482	0.122137	0.00811811	0.0927254
SNORD12B	20q13.13	0.417476	0.343066	0.221374	0.00481002	0.0692106
SNORD12C	20q13.13	0.417476	0.343066	0.221374	0.00481002	0.0692106
SNORD133	12q13.12	0.23301	0.116788	0.0381679	3.39687e-05	0.0162045
SNORD59A	12q13.3	0.213592	0.145985	0.0381679	0.000228225	0.0190381
SNORD59B	12q13.3	0.223301	0.145985	0.0381679	0.000118739	0.0162045
SNORD87	8q13.1	0.660194	0.481752	0.458015	0.00424735	0.0656131
SNRNP35	12q24.31	0.194175	0.131387	0.0381679	0.000823478	0.0291965
SNRPF	12q23.1	0.213592	0.167883	0.0458015	0.000455887	0.022301
SNX21	20q13.12	0.417476	0.343066	0.21374	0.00293636	0.0523415
SOAT1	1q25.2	0.815534	0.635036	0.770992	0.00356509	0.05948
SOAT2	12q13.13	0.23301	0.145985	0.0381679	5.93808e-05	0.0162045
SOCS2	12q22	0.203883	0.160584	0.0534351	0.00199521	0.0434445
SOCS2-AS1	12q22	0.203883	0.160584	0.0534351	0.00199521	0.0434445
SOGA1	20q11.23	0.407767	0.328467	0.198473	0.0019209	0.0429139
SOX18	20q13.33	0.456311	0.372263	0.251908	0.00430445	0.0656131
SOX5	12p12.1	0.184466	0.116788	0.0458015	0.00340315	0.0580078
SP1	12q13.13	0.23301	0.131387	0.0458015	0.000126613	0.0165415
SP7	12q13.13	0.223301	0.131387	0.0458015	0.000265989	0.0195615
SPACA1	6q15	0.213592	0.0948905	0.0839695	0.00495867	0.0693855
SPAG4	20q11.22	0.407767	0.321168	0.175573	0.00037678	0.0205734
SPATA2	20q13.13	0.436893	0.350365	0.206107	0.000625529	0.027297
SPATA25	20q13.12	0.417476	0.343066	0.21374	0.00293636	0.0523415
SPATS2	12q13.12	0.223301	0.109489	0.0458015	0.00015441	0.0170415
SPDYE2	7q22.1	0.194175	0.394161	0.305344	0.00398422	0.063611
SPDYE3	7q22.1	0.203883	0.394161	0.305344	0.00683044	0.0819424
SPDYE6	7q22.1	0.194175	0.394161	0.305344	0.00398422	0.063611
SPIC	12q23.2	0.213592	0.167883	0.0381679	0.000178673	0.0180578
SPINT3	20q13.12	0.417476	0.343066	0.206107	0.0017435	0.0421451
SPINT4	20q13.12	0.417476	0.343066	0.21374	0.00293636	0.0523415
SPO11	20q13.31	0.456311	0.343066	0.236641	0.0019388	0.0429139
SPPL3	12q24.31	0.184466	0.138686	0.0381679	0.00139869	0.0396933
SPRYD3	12q13.13	0.23301	0.153285	0.0381679	6.09384e-05	0.0162045
SPRYD4	12q13.3	0.242718	0.145985	0.0305344	1.00604e-05	0.0162045
SPX	12p12.1	0.174757	0.116788	0.0381679	0.00280847	0.0516176
SRC	20q11.23	0.407767	0.328467	0.19084	0.00111195	0.0342584
SRGAP1	12q14.2	0.203883	0.160584	0.0381679	0.000346444	0.0205734
SRMS	20q13.33	0.436893	0.357664	0.236641	0.00458874	0.0679933
SRPK2	7q22.3	0.223301	0.408759	0.305344	0.00864005	0.0953744
SRRM4	12q24.23	0.203883	0.138686	0.0381679	0.000436451	0.022301
SRRT	7q22.1	0.203883	0.40146	0.305344	0.00467645	0.0685815
SRSF9	12q24.31	0.174757	0.138686	0.0458015	0.00535827	0.0719849
SS18L1	20q13.33	0.446602	0.364964	0.229008	0.00166576	0.0421451
SSH1	12q24.11	0.23301	0.145985	0.0534351	0.000367925	0.0205734
SSPN	12p12.1	0.194175	0.10219	0.0305344	0.000225355	0.0190381
ST8SIA1	12p12.1	0.174757	0.116788	0.0381679	0.00280847	0.0516176
STAB2	12q23.3	0.223301	0.145985	0.0763359	0.00613218	0.0776984
STAC3	12q13.3	0.223301	0.145985	0.0687023	0.00318803	0.055354
STAG3	7q22.1	0.203883	0.394161	0.305344	0.00683044	0.0819424
STAG3L5P	7q22.1	0.203883	0.394161	0.305344	0.00683044	0.0819424
STAG3L5P-PVRIG2P-PILRB	7q22.1	0.203883	0.394161	0.305344	0.00683044	0.0819424
STAT2	12q13.3	0.23301	0.153285	0.0458015	0.000158277	0.0170415
STAT6	12q13.3	0.223301	0.145985	0.0534351	0.0007092	0.027297
STAU1	20q13.13	0.417476	0.343066	0.21374	0.00293636	0.0523415
STK38L	12p11.23	0.203883	0.116788	0.0458015	0.000883088	0.0296568
STK4	20q13.12	0.417476	0.350365	0.206107	0.00156283	0.0415881
STK4-AS1	20q13.12	0.417476	0.350365	0.206107	0.00156283	0.0415881
STMN3	20q13.33	0.456311	0.386861	0.267176	0.00906442	0.096576
STX16	20q13.32	0.456311	0.357664	0.236641	0.00184893	0.0429139
STX16-NPEPL1	20q13.32	0.456311	0.357664	0.236641	0.00184893	0.0429139
STX6	1q25.3	0.805825	0.627737	0.770992	0.00347897	0.0587395
STYK1	12p13.2	0.174757	0.10219	0.0381679	0.00248305	0.050572
SUDS3	12q24.23	0.213592	0.138686	0.0381679	0.000228357	0.0190381
SULF2	20q13.12	0.436893	0.335766	0.221374	0.00203972	0.0440554
SUMO1P1	20q13.2	0.446602	0.386861	0.244275	0.00331624	0.0566166
SUN5	20q11.21	0.38835	0.321168	0.198473	0.00499034	0.0693855
SUOX	12q13.2	0.23301	0.160584	0.0687023	0.00184539	0.0429139
SVOP	12q24.11	0.242718	0.145985	0.0534351	0.000183783	0.0184433
SWT1	1q25.3	0.825243	0.635036	0.770992	0.00220928	0.0468674
SYCP2	20q13.33	0.456311	0.350365	0.221374	0.000690241	0.027297
SYCP3	12q23.2	0.213592	0.160584	0.0381679	0.000201454	0.0190381
SYS1	20q13.12	0.417476	0.343066	0.21374	0.00293636	0.0523415
SYS1-DBNDD2	20q13.12	0.417476	0.343066	0.21374	0.00293636	0.0523415
SYT1	12q21.2	0.213592	0.175182	0.0687023	0.00443912	0.0666521
SYT2	1q32.1	0.805825	0.635036	0.778626	0.00428251	0.0656131
TAC3	12q13.3	0.213592	0.145985	0.0687023	0.00567812	0.0727849
TAF3	10p14	0.281553	0.182482	0.122137	0.00811811	0.0927254
TAF4	20q13.33	0.456311	0.372263	0.236641	0.00162426	0.0421451
TAF6	7q22.1	0.203883	0.394161	0.312977	0.00706422	0.0831718
TAOK3	12q24.23	0.223301	0.138686	0.0381679	0.000114708	0.0162045
TARBP2	12q13.13	0.23301	0.138686	0.0458015	0.000142507	0.0170415
TAS2R10	12p13.2	0.174757	0.10219	0.0458015	0.00543344	0.0719849
TAS2R13	12p13.2	0.174757	0.10219	0.0458015	0.00543344	0.0719849
TAS2R30	12p13.2	0.184466	0.138686	0.0534351	0.0070649	0.0831718
TAS2R7	12p13.2	0.174757	0.10219	0.0458015	0.00543344	0.0719849
TAS2R8	12p13.2	0.174757	0.10219	0.0458015	0.00543344	0.0719849
TAS2R9	12p13.2	0.174757	0.10219	0.0458015	0.00543344	0.0719849
TBC1D15	12q21.1	0.223301	0.160584	0.0610687	0.00154039	0.0415881
TBC1D30	12q14.3	0.203883	0.160584	0.0534351	0.00199521	0.0434445
TBK1	12q14.2	0.203883	0.160584	0.0534351	0.00199521	0.0434445
TBX3	12q24.21	0.213592	0.131387	0.0458015	0.00053787	0.0257817
TBX5	12q24.21	0.213592	0.131387	0.0458015	0.00053787	0.0257817
TBX5-AS1	12q24.21	0.213592	0.131387	0.0458015	0.00053787	0.0257817
TCEA2	20q13.33	0.456311	0.372263	0.251908	0.00430445	0.0656131
TCF24	8q13.1	0.660194	0.481752	0.458015	0.00424735	0.0656131
TCFL5	20q13.33	0.427184	0.357664	0.229008	0.00432295	0.0656131
TCHP	12q24.11	0.213592	0.138686	0.0610687	0.00276026	0.0516176
TCP11L2	12q23.3	0.23301	0.138686	0.0610687	0.000754055	0.0284763
TCTN1	12q24.11	0.223301	0.138686	0.0610687	0.00147115	0.0415881
TCTN2	12q24.31	0.194175	0.138686	0.0458015	0.00190482	0.0429139
TDG	12q23.3	0.223301	0.145985	0.0534351	0.0007092	0.027297
TDRD5	1q25.2	0.805825	0.635036	0.770992	0.0055155	0.0719849
TEAD4	12p13.33	0.174757	0.116788	0.0458015	0.00625	0.0779683
TEDDM1	1q25.3	0.815534	0.627737	0.778626	0.00171274	0.0421451
TESC	12q24.22	0.223301	0.138686	0.0458015	0.000289403	0.0195615
TESC-AS1	12q24.22	0.223301	0.138686	0.0458015	0.000289403	0.0195615
TESPA1	12q13.2	0.213592	0.167883	0.0458015	0.000455887	0.022301
TEX35	1q25.2	0.815534	0.649635	0.770992	0.0087192	0.0958039
TFAP2C	20q13.31	0.436893	0.357664	0.221374	0.00169994	0.0421451
TFCP2	12q13.12	0.252427	0.116788	0.0534351	3.78932e-05	0.0162045
TFR2	7q22.1	0.203883	0.40146	0.29771	0.00435461	0.0656131
TGIF2	20q11.23	0.417476	0.328467	0.183206	0.000381237	0.0205734
TGIF2-C20orf24	20q11.23	0.417476	0.328467	0.183206	0.000381237	0.0205734
TGM2	20q11.23	0.407767	0.321168	0.21374	0.00553006	0.0719849
THAP2	12q21.1	0.223301	0.160584	0.0534351	0.000690084	0.027297
THRIL	12q24.31	0.184466	0.138686	0.0458015	0.00327163	0.0559441
TIAF1	17q11.2	0.359223	0.189781	0.221374	0.0073702	0.0864808
TIGAR	12p13.32	0.174757	0.109489	0.0458015	0.00598364	0.0760412
TIMELESS	12q13.3	0.242718	0.145985	0.0305344	1.00604e-05	0.0162045
TIMM17A	1q32.1	0.796117	0.635036	0.778626	0.0062993	0.0779683
TLDC2	20q11.23	0.407767	0.328467	0.198473	0.0019209	0.0429139
TM7SF3	12p11.23	0.194175	0.109489	0.0381679	0.000676962	0.027297
TM9SF4	20q11.21	0.378641	0.328467	0.183206	0.00230916	0.0484555
TMBIM4	12q14.3	0.203883	0.160584	0.0458015	0.000862856	0.0291965
TMBIM6	12q13.12	0.223301	0.109489	0.0381679	6.20773e-05	0.0162045
TMCC3	12q22	0.203883	0.160584	0.0458015	0.000862856	0.0291965
TMED2	12q24.31	0.194175	0.131387	0.0381679	0.000823478	0.0291965
TMEM106C	12q13.11	0.223301	0.131387	0.0381679	0.000105951	0.0162045
TMEM116	12q24.13	0.213592	0.138686	0.0458015	0.00056531	0.025985
TMEM117	12q12	0.223301	0.124088	0.0381679	9.33257e-05	0.0162045
TMEM119	12q23.3	0.223301	0.145985	0.0381679	0.000118739	0.0162045
TMEM132B	12q24.31	0.184466	0.124088	0.0534351	0.00743348	0.0866538
TMEM132C	12q24.32	0.194175	0.124088	0.0610687	0.00822476	0.0927254
TMEM132D	12q24.33	0.184466	0.131387	0.0534351	0.00740703	0.0864867
TMEM183A	1q32.1	0.805825	0.635036	0.778626	0.00428251	0.0656131
TMEM189	20q13.13	0.427184	0.357664	0.221374	0.00262642	0.0516176
TMEM189-UBE2V1	20q13.13	0.436893	0.357664	0.221374	0.00169994	0.0421451
TMEM19	12q21.1	0.223301	0.160584	0.0534351	0.000690084	0.027297
TMEM198B	12q13.2	0.213592	0.167883	0.0610687	0.00239834	0.049127
TMEM233	12q24.23	0.203883	0.138686	0.0534351	0.00238178	0.049127
TMEM263	12q23.3	0.223301	0.138686	0.0458015	0.000289403	0.0195615
TMEM5	12q14.2	0.203883	0.160584	0.0381679	0.000346444	0.0205734
TMEM5-AS1	12q14.2	0.203883	0.160584	0.0381679	0.000346444	0.0205734
TMEM52B	12p13.2	0.165049	0.10219	0.0381679	0.00484298	0.0692106
TMEM72	10q11.21	0.203883	0.131387	0.0687023	0.00926763	0.0980584
TMEM72-AS1	10q11.21	0.223301	0.131387	0.0763359	0.00506308	0.0697314
TMEM9	1q32.1	0.796117	0.635036	0.770992	0.00818812	0.0927254
TMPO	12q23.1	0.213592	0.175182	0.0458015	0.000393488	0.0208685
TMPO-AS1	12q23.1	0.213592	0.175182	0.0458015	0.000393488	0.0208685
TMPRSS12	12q13.12	0.252427	0.116788	0.0687023	0.000184209	0.0184433
TMTC1	12p11.22	0.203883	0.116788	0.0458015	0.000883088	0.0296568
TMTC2	12q21.31	0.213592	0.167883	0.0687023	0.00498087	0.0693855
TMTC3	12q21.32	0.223301	0.153285	0.0610687	0.00157804	0.0415881
TNFRSF6B	20q13.33	0.456311	0.386861	0.267176	0.00906442	0.096576
TNNC2	20q13.12	0.417476	0.343066	0.206107	0.0017435	0.0421451
TNNI1	1q32.1	0.796117	0.635036	0.770992	0.00818812	0.0927254
TNNT2	1q32.1	0.805825	0.635036	0.770992	0.0055155	0.0719849
TNS2	12q13.13	0.23301	0.145985	0.0381679	5.93808e-05	0.0162045
TOMM34	20q13.12	0.417476	0.350365	0.206107	0.00156283	0.0415881
TOP1	20q12	0.417476	0.343066	0.21374	0.00293636	0.0523415
TOR1AIP1	1q25.2	0.805825	0.635036	0.770992	0.0055155	0.0719849
TOR1AIP2	1q25.2	0.805825	0.635036	0.770992	0.0055155	0.0719849
TOR3A	1q25.2	0.815534	0.635036	0.770992	0.00356509	0.05948
TP53INP2	20q11.22	0.38835	0.313869	0.198473	0.00540384	0.0719849
TP53RK	20q13.12	0.427184	0.335766	0.229008	0.0052491	0.0713624
TP53TG5	20q13.12	0.417476	0.343066	0.206107	0.0017435	0.0421451
TPCN1	12q24.13	0.223301	0.131387	0.0458015	0.000265989	0.0195615
TPD52L2	20q13.33	0.456311	0.379562	0.259542	0.00632266	0.0779683
TPH2	12q21.1	0.223301	0.160584	0.0534351	0.000690084	0.027297
TPR	1q31.1	0.805825	0.635036	0.770992	0.0055155	0.0719849
TPX2	20q11.21	0.38835	0.328467	0.183206	0.00153853	0.0415881
TRAFD1	12q24.13	0.213592	0.138686	0.0534351	0.00129549	0.0380234
TRERNA1	20q13.13	0.436893	0.350365	0.21374	0.00108897	0.0342117
TRHDE	12q21.1	0.223301	0.160584	0.0610687	0.00154039	0.0415881
TRHDE-AS1	12q21.1	0.223301	0.160584	0.0610687	0.00154039	0.0415881
TRIAP1	12q24.31	0.174757	0.138686	0.0458015	0.00535827	0.0719849
TRIM4	7q22.1	0.213592	0.40146	0.312977	0.00826457	0.0927589
TRIM56	7q22.1	0.194175	0.408759	0.312977	0.0018879	0.0429139
TRIP6	7q22.1	0.203883	0.40146	0.305344	0.00467645	0.0685815
TRMT1L	1q25.3	0.815534	0.635036	0.778626	0.00279312	0.0516176
TROAP	12q13.12	0.213592	0.109489	0.0458015	0.000347398	0.0205734
TROVE2	1q31.2	0.825243	0.635036	0.78626	0.00134008	0.0385402
TRPC4AP	20q11.22	0.407767	0.321168	0.19084	0.00120566	0.0356801
TRPV4	12q24.11	0.213592	0.138686	0.0687023	0.00549009	0.0719849
TSC22D4	7q22.1	0.203883	0.40146	0.29771	0.00435461	0.0656131
TSEN15	1q25.3	0.815534	0.635036	0.778626	0.00279312	0.0516176
TSFM	12q14.1	0.223301	0.153285	0.0763359	0.00634998	0.0779683
TSHZ2	20q13.2	0.456311	0.379562	0.236641	0.00147702	0.0415881
TSPAN11	12p11.21	0.194175	0.116788	0.0381679	0.00076022	0.0284763
TSPAN19	12q21.31	0.213592	0.167883	0.0534351	0.00108209	0.0340454
TSPAN8	12q21.1	0.23301	0.160584	0.0534351	0.000381489	0.0205734
TSPY26P	20q11.21	0.378641	0.328467	0.183206	0.00230916	0.0484555
TTC41P	12q23.3	0.223301	0.145985	0.0687023	0.00318803	0.055354
TTI1	20q11.23	0.407767	0.321168	0.21374	0.00553006	0.0719849
TTLL9	20q11.21	0.38835	0.328467	0.183206	0.00153853	0.0415881
TTPA	8q12.3	0.631068	0.467153	0.442748	0.00926593	0.0980584
TUBA1A	12q13.12	0.213592	0.116788	0.0534351	0.00094976	0.0314522
TUBA1B	12q13.12	0.213592	0.116788	0.0534351	0.00094976	0.0314522
TUBA1C	12q13.12	0.213592	0.109489	0.0534351	0.000776415	0.0289817
TUBAL3	10p15.1	0.281553	0.20438	0.122137	0.00931854	0.0984027
TUBB1	20q13.32	0.456311	0.364964	0.236641	0.00175064	0.0421451
TWF1	12q12	0.223301	0.116788	0.0381679	7.81733e-05	0.0162045
TXNRD1	12q23.3	0.223301	0.160584	0.0534351	0.000690084	0.027297
UBC	12q24.31	0.194175	0.138686	0.0381679	0.000799171	0.0291965
UBE2C	20q13.12	0.417476	0.343066	0.206107	0.0017435	0.0421451
UBE2N	12q22	0.203883	0.167883	0.0534351	0.00174453	0.0421451
UBE2T	1q32.1	0.796117	0.627737	0.770992	0.00523519	0.0713544
UBE2V1	20q13.13	0.436893	0.350365	0.221374	0.00184429	0.0429139
UBE3B	12q24.11	0.23301	0.153285	0.0534351	0.000382163	0.0205734
UCHL5	1q31.2	0.825243	0.635036	0.778626	0.00174611	0.0421451
UCKL1	20q13.33	0.456311	0.372263	0.259542	0.00674645	0.0819424
UCKL1-AS1	20q13.33	0.456311	0.372263	0.259542	0.00674645	0.0819424
UCMA	10p13	0.31068	0.182482	0.129771	0.00223068	0.0472745
UCN3	10p15.1	0.281553	0.20438	0.122137	0.00931854	0.0984027
UFSP1	7q22.1	0.203883	0.40146	0.305344	0.00467645	0.0685815
UHRF1BP1L	12q23.1	0.213592	0.167883	0.0458015	0.000455887	0.022301
ULK1	12q24.33	0.194175	0.153285	0.0610687	0.00757977	0.0878811
UNC119	17q11.2	0.349515	0.189781	0.206107	0.00867439	0.095494
UNC119B	12q24.31	0.174757	0.138686	0.0381679	0.00233389	0.0485494
UNG	12q24.11	0.242718	0.153285	0.0381679	3.03357e-05	0.0162045
UPK3BL	7q22.1	0.194175	0.394161	0.305344	0.00398422	0.063611
UQCC1	20q11.22	0.407767	0.328467	0.183206	0.000624906	0.027297
USP15	12q14.1	0.23301	0.160584	0.0458015	0.000156864	0.0170415
USP30	12q24.11	0.242718	0.153285	0.0458015	8.01464e-05	0.0162045
USP30-AS1	12q24.11	0.242718	0.145985	0.0458015	7.52063e-05	0.0162045
USP44	12q22	0.213592	0.167883	0.0458015	0.000455887	0.022301
UTP20	12q23.2	0.203883	0.167883	0.0381679	0.00029702	0.0195615
VAPB	20q13.32	0.456311	0.350365	0.236641	0.00191308	0.0429139
VDR	12q13.11	0.223301	0.131387	0.0381679	0.000105951	0.0162045
VEZT	12q22	0.213592	0.167883	0.0458015	0.000455887	0.022301
VGF	7q22.1	0.194175	0.408759	0.29771	0.00166154	0.0421451
VPS29	12q24.11	0.223301	0.138686	0.0458015	0.000289403	0.0195615
VPS33A	12q24.31	0.174757	0.145985	0.0381679	0.00201237	0.0437293
VPS37B	12q24.31	0.184466	0.145985	0.0458015	0.00296009	0.0525459
VSIG10	12q24.23	0.223301	0.138686	0.0381679	0.000114708	0.0162045
VSTM2L	20q11.23	0.407767	0.321168	0.21374	0.00553006	0.0719849
WDR66	12q24.31	0.184466	0.138686	0.0534351	0.0070649	0.0831718
WFDC10A	20q13.12	0.417476	0.343066	0.206107	0.0017435	0.0421451
WFDC10B	20q13.12	0.417476	0.343066	0.206107	0.0017435	0.0421451
WFDC11	20q13.12	0.417476	0.343066	0.206107	0.0017435	0.0421451
WFDC12	20q13.12	0.417476	0.343066	0.206107	0.0017435	0.0421451
WFDC13	20q13.12	0.417476	0.343066	0.206107	0.0017435	0.0421451
WFDC2	20q13.12	0.417476	0.343066	0.206107	0.0017435	0.0421451
WFDC3	20q13.12	0.417476	0.343066	0.21374	0.00293636	0.0523415
WFDC5	20q13.12	0.417476	0.343066	0.206107	0.0017435	0.0421451
WFDC6	20q13.12	0.417476	0.343066	0.206107	0.0017435	0.0421451
WFDC8	20q13.12	0.417476	0.343066	0.206107	0.0017435	0.0421451
WFDC9	20q13.12	0.417476	0.343066	0.206107	0.0017435	0.0421451
WIF1	12q14.3	0.203883	0.160584	0.0534351	0.00199521	0.0434445
WISP2	20q13.12	0.417476	0.350365	0.206107	0.00156283	0.0415881
WNK1	12p13.33	0.223301	0.145985	0.0610687	0.00155504	0.0415881
WNT1	12q13.12	0.213592	0.124088	0.0687023	0.00451508	0.0674147
WNT10B	12q13.12	0.213592	0.131387	0.0687023	0.00509008	0.0697314
WNT5B	12p13.33	0.194175	0.145985	0.0610687	0.00822398	0.0927254
WSB2	12q24.23	0.223301	0.138686	0.0381679	0.000114708	0.0162045
WSCD2	12q23.3	0.223301	0.145985	0.0458015	0.000301283	0.0195615
XKR7	20q11.21	0.378641	0.328467	0.183206	0.00230916	0.0484555
XLOC_009911	12q24.31	0.194175	0.138686	0.0381679	0.000799171	0.0291965
XPOT	12q14.2	0.203883	0.160584	0.0458015	0.000862856	0.0291965
XPR1	1q25.3	0.805825	0.635036	0.770992	0.0055155	0.0719849
YAF2	12q12	0.223301	0.116788	0.0305344	2.87746e-05	0.0162045
YARS2	12p11.21	0.213592	0.124088	0.0458015	0.000488699	0.0237974
YBX3	12p13.2	0.174757	0.10219	0.0381679	0.00248305	0.050572
YEATS4	12q15	0.23301	0.175182	0.0610687	0.000785932	0.0291844
YTHDF1	20q13.33	0.436893	0.350365	0.236641	0.00487932	0.0692106
YTHDF3-AS1	8q12.3	0.631068	0.467153	0.442748	0.00926593	0.0980584
YWHAB	20q13.12	0.417476	0.343066	0.206107	0.0017435	0.0421451
ZAN	7q22.1	0.213592	0.40146	0.312977	0.00826457	0.0927589
ZASP	7q22.1	0.203883	0.40146	0.29771	0.00435461	0.0656131
ZBP1	20q13.31	0.456311	0.357664	0.236641	0.00184893	0.0429139
ZBTB39	12q13.3	0.213592	0.145985	0.0687023	0.00567812	0.0727849
ZBTB46-AS1	20q13.33	0.456311	0.379562	0.259542	0.00632266	0.0779683
ZC3H10	12q13.2	0.223301	0.160584	0.0687023	0.003221	0.0556521
ZCRB1	12q12	0.223301	0.116788	0.0305344	2.87746e-05	0.0162045
ZCWPW1	7q22.1	0.203883	0.40146	0.305344	0.00467645	0.0685815
ZDHHC17	12q21.2	0.223301	0.145985	0.0610687	0.00155504	0.0415881
ZFAS1	20q13.13	0.417476	0.343066	0.221374	0.00481002	0.0692106
ZFC3H1	12q21.1	0.223301	0.160584	0.0534351	0.000690084	0.027297
ZFP64	20q13.2	0.456311	0.357664	0.229008	0.00111445	0.0342584
ZGPAT	20q13.33	0.456311	0.386861	0.267176	0.00906442	0.096576
ZHX3	20q12	0.427184	0.350365	0.21374	0.00172608	0.0421451
ZKSCAN1	7q22.1	0.203883	0.40146	0.312977	0.00490347	0.0692106
ZKSCAN5	7q22.1	0.203883	0.394161	0.305344	0.00683044	0.0819424
ZMYND8	20q13.12	0.436893	0.335766	0.221374	0.00203972	0.0440554
ZNF10	12q24.33	0.194175	0.153285	0.0534351	0.00362153	0.0597344
ZNF140	12q24.33	0.194175	0.153285	0.0610687	0.00757977	0.0878811
ZNF217	20q13.2	0.456311	0.379562	0.236641	0.00147702	0.0415881
ZNF22	10q11.21	0.203883	0.131387	0.0687023	0.00926763	0.0980584
ZNF239	10q11.21	0.223301	0.138686	0.0763359	0.00569004	0.0727849
[truncated: 35 more rows]

## Sheet: Table S4
Table S4. The significant deleted regions and genes among three clusters
gene	Cytoband	fre_cluster1	fre_cluster2	fre_cluster3	pvalue	p.adj
AAGAB	15q23	0.330097	0.153285	0.122137	0.000114435	0.00674713
ABHD17C	15q25.1	0.330097	0.138686	0.137405	0.000141113	0.00720398
ABHD2	15q26.1	0.31068	0.131387	0.167939	0.00152751	0.0405441
ABR	17p13.3	0.708738	0.50365	0.564885	0.00547036	0.0984525
ACADVL	17p13.1	0.728155	0.518248	0.587786	0.00418363	0.0841187
ACAN	15q26.1	0.31068	0.131387	0.167939	0.00152751	0.0405441
ACAP1	17p13.1	0.728155	0.518248	0.610687	0.00433284	0.0859468
ACSBG1	15q25.1	0.330097	0.131387	0.137405	8.94385e-05	0.00550599
ACTC1	15q14	0.31068	0.160584	0.114504	0.0004131	0.0145811
ACTG1P17	15q25.2	0.320388	0.138686	0.137405	0.000309849	0.0123633
ADAL	15q15.3	0.330097	0.160584	0.122137	0.00015837	0.00779964
ADAM10	15q21.3	0.320388	0.124088	0.0992366	9.04859e-06	0.00205563
ADAMTS7	15q25.1	0.330097	0.131387	0.137405	8.94385e-05	0.00550599
ADAMTS7P1	15q25.2	0.320388	0.131387	0.137405	0.000200479	0.00920224
ADAMTSL3	15q25.2	0.330097	0.160584	0.137405	0.000438444	0.0153463
ADPGK	15q24.1	0.320388	0.131387	0.129771	0.00012941	0.00710941
ADPGK-AS1	15q24.1	0.320388	0.131387	0.129771	0.00012941	0.00710941
AEN	15q26.1	0.31068	0.131387	0.160305	0.00118461	0.0332374
AGBL1	15q25.3	0.31068	0.138686	0.152672	0.00136075	0.0376745
AGBL1-AS1	15q25.3	0.31068	0.138686	0.145038	0.000967573	0.0297828
AIPL1	17p13.2	0.728155	0.518248	0.572519	0.00368369	0.078357
AKAP13	15q25.3	0.31068	0.153285	0.145038	0.0020039	0.0503878
ALDH1A2	15q21.3	0.31068	0.124088	0.0992366	2.24238e-05	0.00228716
ALDH1A3	15q26.3	0.320388	0.175182	0.152672	0.00361539	0.0778651
ALOX12	17p13.1	0.728155	0.518248	0.587786	0.00418363	0.0841187
ALOX12-AS1	17p13.1	0.728155	0.518248	0.587786	0.00418363	0.0841187
ALOX12B	17p13.1	0.737864	0.532847	0.610687	0.00525431	0.096204
ALOX12P2	17p13.1	0.737864	0.518248	0.587786	0.00239334	0.0583859
ALOX15	17p13.2	0.728155	0.510949	0.557252	0.0022242	0.0547703
ALOX15B	17p13.1	0.737864	0.532847	0.610687	0.00525431	0.096204
ALOX15P1	17p13.1	0.728155	0.518248	0.580153	0.00396636	0.0819544
ALOXE3	17p13.1	0.737864	0.532847	0.610687	0.00525431	0.096204
ALPK3	15q25.3	0.31068	0.153285	0.137405	0.00134419	0.0373643
ANKDD1A	15q22.31	0.320388	0.138686	0.10687	3.98969e-05	0.00317521
ANKFY1	17p13.2	0.718447	0.510949	0.557252	0.00395731	0.0819544
ANKRD34C	15q25.1	0.330097	0.131387	0.137405	8.94385e-05	0.00550599
ANKRD34C-AS1	15q25.1	0.330097	0.131387	0.137405	8.94385e-05	0.00550599
ANKRD63	15q15.1	0.320388	0.153285	0.145038	0.000999646	0.0299105
ANP32A	15q23	0.339806	0.138686	0.122137	2.26192e-05	0.00228716
ANP32A-IT1	15q23	0.339806	0.138686	0.122137	2.26192e-05	0.00228716
ANP32AP1	15q14	0.31068	0.160584	0.114504	0.0004131	0.0145811
ANPEP	15q26.1	0.31068	0.131387	0.160305	0.00118461	0.0332374
ANXA2	15q22.2	0.330097	0.131387	0.0992366	5.69292e-06	0.00205563
AP3B2	15q25.2	0.320388	0.138686	0.137405	0.000309849	0.0123633
AP3S2	15q26.1	0.31068	0.131387	0.160305	0.00118461	0.0332374
AP4E1	15q21.2	0.31068	0.153285	0.114504	0.000314235	0.0123633
APBA2	15q13.1	0.349515	0.175182	0.137405	0.000181155	0.00885925
APH1B	15q22.2	0.330097	0.138686	0.114504	3.05698e-05	0.00286931
APOA1	11q23.3	0.31068	0.321168	0.160305	0.00460017	0.089987
APOA1-AS	11q23.3	0.31068	0.321168	0.160305	0.00460017	0.089987
APOA4	11q23.3	0.31068	0.321168	0.160305	0.00460017	0.089987
APOA5	11q23.3	0.300971	0.321168	0.152672	0.00319891	0.0727786
APOC3	11q23.3	0.31068	0.321168	0.160305	0.00460017	0.089987
AQP9	15q21.3	0.320388	0.124088	0.0992366	9.04859e-06	0.00205563
AQR	15q14	0.31068	0.160584	0.114504	0.0004131	0.0145811
ARHGAP11A	15q13.3	0.31068	0.160584	0.129771	0.00115596	0.0332374
ARHGAP11B	15q13.2	0.349515	0.175182	0.19084	0.0027441	0.0655672
ARHGEF12	11q23.3	0.300971	0.306569	0.152672	0.00561618	0.0984525
ARID3B	15q24.1	0.320388	0.145985	0.160305	0.00139881	0.0379254
ARIH1	15q24.1	0.320388	0.131387	0.129771	0.00012941	0.00710941
ARNT2	15q25.1	0.330097	0.131387	0.137405	8.94385e-05	0.00550599
ARPIN	15q26.1	0.31068	0.131387	0.160305	0.00118461	0.0332374
ARPP19	15q21.2	0.339806	0.153285	0.10687	1.49916e-05	0.00205563
ARRB2	17p13.2	0.728155	0.510949	0.557252	0.0022242	0.0547703
ARRDC4	15q26.2	0.320388	0.175182	0.152672	0.00361539	0.0778651
ASB7	15q26.3	0.320388	0.175182	0.152672	0.00361539	0.0778651
ASB9P1	15q26.1	0.31068	0.167883	0.152672	0.00522746	0.096204
ASGR1	17p13.1	0.728155	0.518248	0.587786	0.00418363	0.0841187
ASGR2	17p13.1	0.728155	0.518248	0.587786	0.00418363	0.0841187
ASPA	17p13.2	0.718447	0.510949	0.541985	0.00309005	0.0706089
ATP10A	15q12	0.339806	0.175182	0.0992366	1.81688e-05	0.00205563
ATP1B2	17p13.1	0.737864	0.532847	0.603053	0.00512823	0.096204
ATP2A3	17p13.2	0.718447	0.510949	0.564885	0.00434436	0.0859468
ATP8B4	15q21.2	0.320388	0.145985	0.114504	0.00010374	0.00618626
AVEN	15q14	0.31068	0.160584	0.114504	0.0004131	0.0145811
B2M	15q21.1	0.31068	0.160584	0.0992366	0.000122863	0.00700719
BAHD1	15q15.1	0.320388	0.153285	0.145038	0.000999646	0.0299105
BBS4	15q24.1	0.320388	0.131387	0.129771	0.00012941	0.00710941
BCL2A1	15q25.1	0.330097	0.131387	0.137405	8.94385e-05	0.00550599
BCL2L10	15q21.2	0.339806	0.145985	0.0992366	5.25636e-06	0.00205563
BCL6B	17p13.1	0.728155	0.518248	0.587786	0.00418363	0.0841187
BCO2	11q23.1	0.300971	0.306569	0.152672	0.00561618	0.0984525
BLM	15q26.1	0.31068	0.131387	0.160305	0.00118461	0.0332374
BLOC1S6	15q21.1	0.31068	0.160584	0.114504	0.0004131	0.0145811
BMF	15q15.1	0.320388	0.153285	0.145038	0.000999646	0.0299105
BNC1	15q25.2	0.320388	0.131387	0.129771	0.00012941	0.00710941
BNIP2	15q22.2	0.320388	0.124088	0.0992366	9.04859e-06	0.00205563
BTBD1	15q25.2	0.320388	0.131387	0.129771	0.00012941	0.00710941
BUB1B	15q15.1	0.320388	0.153285	0.145038	0.000999646	0.0299105
BUB1B-PAK6	15q15.1	0.320388	0.153285	0.145038	0.000999646	0.0299105
BUD13	11q23.3	0.300971	0.321168	0.152672	0.00319891	0.0727786
C11orf1	11q23.1	0.291262	0.313869	0.152672	0.00520997	0.096204
C11orf52	11q23.1	0.291262	0.313869	0.152672	0.00520997	0.096204
C11orf57	11q23.1	0.300971	0.306569	0.152672	0.00561618	0.0984525
C11orf71	11q23.2	0.300971	0.306569	0.152672	0.00561618	0.0984525
C15orf32	15q26.1	0.31068	0.167883	0.152672	0.00522746	0.096204
C15orf38-AP3S2	15q26.1	0.31068	0.131387	0.160305	0.00118461	0.0332374
C15orf39	15q24.2	0.31068	0.138686	0.152672	0.00136075	0.0376745
C15orf40	15q25.2	0.330097	0.131387	0.129771	5.653e-05	0.00409422
C15orf41	15q14	0.31068	0.145985	0.122137	0.000387351	0.0145811
C15orf48	15q21.1	0.300971	0.160584	0.114504	0.000849611	0.0269442
C15orf52	15q15.1	0.320388	0.153285	0.145038	0.000999646	0.0299105
C15orf53	15q14	0.31068	0.153285	0.122137	0.000533119	0.0184747
C15orf54	15q14	0.320388	0.153285	0.129771	0.000414806	0.0145921
C15orf56	15q15.1	0.320388	0.153285	0.145038	0.000999646	0.0299105
C15orf57	15q15.1	0.320388	0.145985	0.145038	0.000693786	0.0226194
C15orf59	15q24.1	0.320388	0.131387	0.145038	0.000297579	0.0121891
C15orf59-AS1	15q24.1	0.320388	0.131387	0.145038	0.000297579	0.0121891
C15orf61	15q23	0.320388	0.138686	0.114504	7.13755e-05	0.00493056
C15orf62	15q15.1	0.320388	0.160584	0.145038	0.00138811	0.0378314
C15orf65	15q21.3	0.31068	0.131387	0.0916031	1.77776e-05	0.00205563
C17orf100	17p13.1	0.728155	0.518248	0.580153	0.00396636	0.0819544
C17orf107	17p13.2	0.728155	0.510949	0.549618	0.00196585	0.0496348
C17orf49	17p13.1	0.728155	0.518248	0.587786	0.00418363	0.0841187
C17orf74	17p13.1	0.737864	0.518248	0.610687	0.00255172	0.0611798
C1QBP	17p13.2	0.728155	0.518248	0.557252	0.00298833	0.0696534
C2CD4A	15q22.2	0.320388	0.124088	0.0992366	9.04859e-06	0.00205563
C2CD4B	15q22.2	0.320388	0.124088	0.0992366	9.04859e-06	0.00205563
CA12	15q22.2	0.330097	0.138686	0.10687	1.67442e-05	0.00205563
CADM1	11q23.3	0.300971	0.306569	0.152672	0.00561618	0.0984525
CALML4	15q23	0.339806	0.138686	0.122137	2.26192e-05	0.00228716
CAMKK1	17p13.2	0.718447	0.510949	0.564885	0.00434436	0.0859468
CAMTA2	17p13.2	0.728155	0.510949	0.549618	0.00196585	0.0496348
CAPN3	15q15.1	0.330097	0.160584	0.129771	0.000269172	0.0113819
CASC4	15q15.3	0.330097	0.160584	0.114504	8.91644e-05	0.00550599
CATSPER2	15q15.3	0.339806	0.189781	0.145038	0.00101229	0.0300971
CATSPER2P1	15q15.3	0.339806	0.160584	0.114504	3.9642e-05	0.00317521
CCDC33	15q24.1	0.330097	0.131387	0.152672	0.000197233	0.00920224
CCDC42	17p13.1	0.737864	0.532847	0.59542	0.00490122	0.0953414
CCNB2	15q22.2	0.320388	0.124088	0.0992366	9.04859e-06	0.00205563
CCNDBP1	15q15.2	0.330097	0.167883	0.122137	0.000211273	0.00959253
CCPG1	15q21.3	0.31068	0.131387	0.0916031	1.77776e-05	0.00205563
CCZ1B	7p22.1	0.106796	0.080292	0.00763359	0.00408458	0.0841187
CD276	15q24.1	0.320388	0.131387	0.145038	0.000297579	0.0121891
CD68	17p13.1	0.737864	0.532847	0.603053	0.00512823	0.096204
CDAN1	15q15.2	0.330097	0.160584	0.122137	0.00015837	0.00779964
CELF6	15q23	0.330097	0.131387	0.122137	3.41813e-05	0.00300267
CEMIP	15q25.1	0.330097	0.138686	0.137405	0.000141113	0.00720398
CEP152	15q21.1	0.320388	0.153285	0.129771	0.000414806	0.0145921
CFAP161	15q25.1	0.330097	0.138686	0.137405	0.000141113	0.00720398
CFAP52	17p13.1	0.737864	0.525547	0.587786	0.00334366	0.075254
CGNL1	15q21.3	0.31068	0.138686	0.114504	0.000161897	0.00795461
CHAC1	15q15.1	0.320388	0.167883	0.145038	0.00185987	0.0485399
CHD2	15q26.1	0.31068	0.167883	0.152672	0.00522746	0.096204
CHD3	17p13.1	0.737864	0.532847	0.603053	0.00512823	0.096204
CHP1	15q15.1	0.320388	0.167883	0.145038	0.00185987	0.0485399
CHRM5	15q14	0.31068	0.160584	0.114504	0.0004131	0.0145811
CHRNA3	15q25.1	0.330097	0.138686	0.137405	0.000141113	0.00720398
CHRNA5	15q25.1	0.330097	0.138686	0.137405	0.000141113	0.00720398
CHRNA7	15q13.3	0.300971	0.160584	0.137405	0.00351813	0.0778651
CHRNB1	17p13.1	0.737864	0.518248	0.610687	0.00255172	0.0611798
CHRNB4	15q25.1	0.330097	0.138686	0.137405	0.000141113	0.00720398
CHRNE	17p13.2	0.728155	0.510949	0.549618	0.00196585	0.0496348
CHST14	15q15.1	0.320388	0.153285	0.145038	0.000999646	0.0299105
CHSY1	15q26.3	0.320388	0.189781	0.152672	0.00559175	0.0984525
CIB1	15q26.1	0.320388	0.131387	0.160305	0.000580174	0.0198101
CIB2	15q25.1	0.330097	0.131387	0.129771	5.653e-05	0.00409422
CILP	15q22.31	0.320388	0.138686	0.10687	3.98969e-05	0.00317521
CKMT1A	15q15.3	0.339806	0.175182	0.129771	0.000225942	0.0101922
CKMT1B	15q15.3	0.339806	0.189781	0.129771	0.000358391	0.0138727
CLDN25	11q23.2	0.300971	0.306569	0.152672	0.00561618	0.0984525
CLDN7	17p13.1	0.728155	0.518248	0.587786	0.00418363	0.0841187
CLEC10A	17p13.1	0.728155	0.518248	0.587786	0.00418363	0.0841187
CLK3	15q24.1	0.320388	0.145985	0.160305	0.00139881	0.0379254
CLN6	15q23	0.339806	0.138686	0.122137	2.26192e-05	0.00228716
CLPX	15q22.31	0.31068	0.138686	0.10687	9.23754e-05	0.00558818
CLUH	17p13.3	0.718447	0.510949	0.549618	0.00353237	0.0778651
CNTROB	17p13.1	0.737864	0.532847	0.610687	0.00525431	0.096204
COMMD4	15q24.2	0.31068	0.138686	0.145038	0.000967573	0.0297828
COPS2	15q21.1	0.320388	0.160584	0.114504	0.000194804	0.00920224
CORO2B	15q23	0.339806	0.131387	0.122137	1.42148e-05	0.00205563
COX5A	15q24.2	0.320388	0.138686	0.152672	0.000665463	0.021832
CPEB1	15q25.2	0.320388	0.138686	0.137405	0.000309849	0.0123633
CPEB1-AS1	15q25.2	0.320388	0.138686	0.137405	0.000309849	0.0123633
CPLX3	15q24.1	0.320388	0.138686	0.152672	0.000665463	0.021832
CRABP1	15q25.1	0.330097	0.131387	0.137405	8.94385e-05	0.00550599
CRAT37	15q26.1	0.31068	0.153285	0.160305	0.00395346	0.0819544
CRTC3	15q26.1	0.300971	0.131387	0.160305	0.00234507	0.0572751
CRTC3-AS1	15q26.1	0.300971	0.131387	0.160305	0.00234507	0.0572751
CRYAB	11q23.1	0.291262	0.313869	0.152672	0.00520997	0.096204
CSK	15q24.1	0.320388	0.145985	0.152672	0.00100459	0.0299105
CSMD1	8p23.2	0.776699	0.613139	0.78626	0.00219116	0.0544693
CSNK1A1P1	15q14	0.31068	0.145985	0.122137	0.000387351	0.0145811
CSNK1G1	15q22.31	0.330097	0.131387	0.114504	1.9739e-05	0.00212967
CSPG4	15q24.2	0.31068	0.124088	0.145038	0.000398762	0.0145811
CT62	15q23	0.330097	0.138686	0.122137	5.32384e-05	0.00396807
CTDNEP1	17p13.1	0.728155	0.518248	0.587786	0.00418363	0.0841187
CTDSPL2	15q15.3	0.330097	0.160584	0.114504	8.91644e-05	0.00550599
CTNS	17p13.2	0.718447	0.510949	0.541985	0.00309005	0.0706089
CTSH	15q25.1	0.330097	0.131387	0.137405	8.94385e-05	0.00550599
CTXN2	15q21.1	0.320388	0.160584	0.122137	0.000339548	0.0131857
CXCL16	17p13.2	0.728155	0.510949	0.557252	0.0022242	0.0547703
CYB5D1	17p13.1	0.737864	0.532847	0.603053	0.00512823	0.096204
CYB5D2	17p13.2	0.718447	0.510949	0.557252	0.00395731	0.0819544
CYFIP1	15q11.2	0.300971	0.182482	0.129771	0.00414105	0.0841187
CYP11A1	15q24.1	0.330097	0.131387	0.152672	0.000197233	0.00920224
CYP19A1	15q21.2	0.31068	0.153285	0.114504	0.000314235	0.0123633
CYP1A1	15q24.1	0.320388	0.145985	0.160305	0.00139881	0.0379254
CYP1A2	15q24.1	0.320388	0.145985	0.152672	0.00100459	0.0299105
DAPK2	15q22.31	0.330097	0.131387	0.114504	1.9739e-05	0.00212967
DBET	4q35.2	0.524272	0.372263	0.274809	0.000479357	0.0166946
DCAF13P3	15q21.2	0.31068	0.153285	0.114504	0.000314235	0.0123633
DDX11L9	15q26.3	0.339806	0.189781	0.167939	0.00361014	0.0778651
DENND4A	15q22.31	0.330097	0.131387	0.10687	1.08671e-05	0.00205563
DERL2	17p13.2	0.728155	0.518248	0.557252	0.00298833	0.0696534
DET1	15q26.1	0.31068	0.131387	0.160305	0.00118461	0.0332374
DHRS7C	17p13.1	0.737864	0.525547	0.587786	0.00334366	0.075254
DHX33	17p13.2	0.728155	0.518248	0.557252	0.00298833	0.0696534
DIS3L	15q22.31	0.320388	0.124088	0.10687	1.68429e-05	0.00205563
DISP2	15q15.1	0.320388	0.153285	0.145038	0.000999646	0.0299105
DIXDC1	11q23.1	0.300971	0.313869	0.152672	0.0042829	0.0858673
DLAT	11q23.1	0.300971	0.313869	0.152672	0.0042829	0.0858673
DLG4	17p13.1	0.728155	0.518248	0.587786	0.00418363	0.0841187
DLL4	15q15.1	0.320388	0.167883	0.145038	0.00185987	0.0485399
DMXL2	15q21.2	0.31068	0.153285	0.10687	0.000176828	0.00866789
DNAH2	17p13.1	0.737864	0.532847	0.603053	0.00512823	0.096204
DNAJA4	15q25.1	0.330097	0.131387	0.137405	8.94385e-05	0.00550599
DNAJC17	15q15.1	0.320388	0.160584	0.145038	0.00138811	0.0378314
DNM1P35	15q24.2	0.31068	0.124088	0.145038	0.000398762	0.0145811
DNM1P41	15q25.2	0.300971	0.145985	0.137405	0.00194466	0.0496348
DNM1P46	15q26.3	0.320388	0.167883	0.160305	0.00396169	0.0819544
DPH6	15q14	0.31068	0.160584	0.122137	0.000706485	0.0226454
DPH6-AS1	15q14	0.31068	0.153285	0.122137	0.000533119	0.0184747
DPP8	15q22.31	0.320388	0.138686	0.10687	3.98969e-05	0.00317521
DRAIC	15q23	0.339806	0.131387	0.114504	8.04072e-06	0.00205563
DTWD1	15q21.2	0.320388	0.145985	0.114504	0.00010374	0.00618626
DUOX1	15q21.1	0.31068	0.160584	0.114504	0.0004131	0.0145811
DUOX2	15q21.1	0.31068	0.160584	0.122137	0.000706485	0.0226454
DUOXA1	15q21.1	0.31068	0.160584	0.114504	0.0004131	0.0145811
DUOXA2	15q21.1	0.31068	0.160584	0.122137	0.000706485	0.0226454
DUT	15q21.1	0.320388	0.160584	0.122137	0.000339548	0.0131857
DUX4|chr4	4q35.2	0.524272	0.372263	0.274809	0.000479357	0.0166946
DVL2	17p13.1	0.728155	0.518248	0.587786	0.00418363	0.0841187
DYX1C1	15q21.3	0.31068	0.131387	0.0916031	1.77776e-05	0.00205563
DYX1C1-CCPG1	15q21.3	0.31068	0.131387	0.0916031	1.77776e-05	0.00205563
EDC3	15q24.1	0.320388	0.145985	0.160305	0.00139881	0.0379254
EEF1DP3	13q13.1	0.524272	0.518248	0.335878	0.00288431	0.0679859
EFL1	15q25.2	0.320388	0.131387	0.137405	0.000200479	0.00920224
EFNB3	17p13.1	0.737864	0.532847	0.603053	0.00512823	0.096204
EFTUD1P1	15q25.2	0.31068	0.145985	0.129771	0.000623384	0.0209776
EHD4	15q15.1	0.330097	0.160584	0.129771	0.000269172	0.0113819
EHD4-AS1	15q15.1	0.330097	0.160584	0.129771	0.000269172	0.0113819
EID1	15q21.1	0.320388	0.153285	0.114504	0.000144907	0.00732621
EIF2AK4	15q15.1	0.320388	0.153285	0.145038	0.000999646	0.0299105
EIF3J	15q21.1	0.330097	0.160584	0.0992366	2.4606e-05	0.00246425
EIF3J-AS1	15q21.1	0.330097	0.160584	0.0992366	2.4606e-05	0.00246425
EIF4A1	17p13.1	0.737864	0.532847	0.603053	0.00512823	0.096204
EIF5A	17p13.1	0.728155	0.518248	0.610687	0.00433284	0.0859468
ELL3	15q15.3	0.339806	0.160584	0.114504	3.9642e-05	0.00317521
ELP5	17p13.1	0.728155	0.518248	0.587786	0.00418363	0.0841187
EMC4	15q14	0.31068	0.160584	0.114504	0.0004131	0.0145811
EMC6	17p13.2	0.718447	0.510949	0.549618	0.00353237	0.0778651
EMC7	15q14	0.31068	0.160584	0.114504	0.0004131	0.0145811
ENO3	17p13.2	0.728155	0.510949	0.549618	0.00196585	0.0496348
EPB42	15q15.2	0.330097	0.167883	0.122137	0.000211273	0.00959253
ETFA	15q24.2	0.320388	0.131387	0.145038	0.000297579	0.0121891
EWSAT1	15q23	0.339806	0.124088	0.114504	4.86615e-06	0.00205563
EXD1	15q15.1	0.320388	0.167883	0.145038	0.00185987	0.0485399
EYA1	8q13.3	0	0.10219	0.0534351	0.0031259	0.0713503
FAH	15q25.1	0.330097	0.131387	0.137405	8.94385e-05	0.00550599
FAM103A1	15q25.2	0.330097	0.131387	0.129771	5.653e-05	0.00409422
FAM138E	15q26.3	0.339806	0.189781	0.167939	0.00361014	0.0778651
FAM169B	15q26.3	0.31068	0.167883	0.152672	0.00522746	0.096204
FAM174B	15q26.1	0.31068	0.167883	0.152672	0.00522746	0.096204
FAM189A1	15q13.1	0.359223	0.167883	0.137405	6.02318e-05	0.00425916
FAM214A	15q21.2	0.339806	0.153285	0.10687	1.49916e-05	0.00205563
FAM219B	15q24.1	0.320388	0.138686	0.152672	0.000665463	0.021832
FAM227B	15q21.2	0.320388	0.160584	0.114504	0.000194804	0.00920224
FAM63B	15q21.3	0.320388	0.124088	0.0992366	9.04859e-06	0.00205563
FAM64A	17p13.2	0.728155	0.518248	0.572519	0.00368369	0.078357
FAM81A	15q22.2	0.320388	0.124088	0.0992366	9.04859e-06	0.00205563
FAM96A	15q22.31	0.330097	0.131387	0.114504	1.9739e-05	0.00212967
FAM98B	15q14	0.31068	0.145985	0.122137	0.000387351	0.0145811
FAN1	15q13.3	0.31068	0.160584	0.10687	0.000230718	0.010253
FANCI	15q26.1	0.31068	0.131387	0.167939	0.00152751	0.0405441
FBN1	15q21.1	0.320388	0.160584	0.129771	0.000566288	0.0195594
FBXL22	15q22.31	0.339806	0.131387	0.10687	4.33656e-06	0.00205563
FBXO22	15q24.2	0.31068	0.124088	0.145038	0.000398762	0.0145811
FBXO22-AS1	15q24.2	0.31068	0.124088	0.145038	0.000398762	0.0145811
FBXO39	17p13.1	0.728155	0.518248	0.580153	0.00396636	0.0819544
FDXACB1	11q23.1	0.291262	0.313869	0.152672	0.00520997	0.096204
FEM1B	15q23	0.339806	0.138686	0.122137	2.26192e-05	0.00228716
FES	15q26.1	0.31068	0.131387	0.160305	0.00118461	0.0332374
FGF11	17p13.1	0.737864	0.518248	0.610687	0.00255172	0.0611798
FGF7	15q21.2	0.320388	0.153285	0.114504	0.000144907	0.00732621
FLCN	17p11.2	0.61165	0.40146	0.480916	0.00541885	0.0984525
FLJ10038	15q21.2	0.31068	0.145985	0.114504	0.000230069	0.010253
FMN1	15q13.3	0.31068	0.160584	0.122137	0.000706485	0.0226454
FOXB1	15q22.2	0.320388	0.131387	0.0992366	1.41683e-05	0.00205563
FRMD5	15q15.3	0.339806	0.160584	0.114504	3.9642e-05	0.00317521
FSD2	15q25.2	0.320388	0.138686	0.137405	0.000309849	0.0123633
FSIP1	15q14	0.320388	0.153285	0.137405	0.000657451	0.021832
FURIN	15q26.1	0.31068	0.131387	0.160305	0.00118461	0.0332374
FXR2	17p13.1	0.737864	0.532847	0.610687	0.00525431	0.096204
GABARAP	17p13.1	0.728155	0.518248	0.587786	0.00418363	0.0841187
GABARAPL3	15q26.1	0.31068	0.131387	0.160305	0.00118461	0.0332374
GABPB1	15q21.2	0.31068	0.145985	0.114504	0.000230069	0.010253
GABPB1-AS1	15q21.2	0.31068	0.145985	0.114504	0.000230069	0.010253
GABRA5	15q12	0.339806	0.167883	0.0992366	1.40966e-05	0.00205563
GABRB3	15q12	0.339806	0.167883	0.0992366	1.40966e-05	0.00205563
GABRG3	15q12	0.339806	0.167883	0.0992366	1.40966e-05	0.00205563
GABRG3-AS1	15q12	0.330097	0.167883	0.0992366	3.21604e-05	0.00300267
GALK2	15q21.1	0.320388	0.167883	0.114504	0.000252378	0.0111681
GANC	15q15.1	0.330097	0.160584	0.129771	0.000269172	0.0113819
GAS7	17p13.1	0.737864	0.525547	0.587786	0.00334366	0.075254
GATM	15q21.1	0.300971	0.160584	0.114504	0.000849611	0.0269442
GCHFR	15q15.1	0.320388	0.160584	0.145038	0.00138811	0.0378314
GCNT3	15q22.2	0.320388	0.124088	0.0992366	9.04859e-06	0.00205563
GCOM1	15q21.3	0.31068	0.138686	0.0992366	5.0172e-05	0.00380489
GDPGP1	15q26.1	0.320388	0.131387	0.160305	0.000580174	0.0198101
GGT6	17p13.2	0.728155	0.510949	0.557252	0.0022242	0.0547703
GJD2	15q14	0.31068	0.160584	0.114504	0.0004131	0.0145811
GLCE	15q23	0.339806	0.124088	0.114504	4.86615e-06	0.00205563
GLDN	15q21.2	0.31068	0.153285	0.114504	0.000314235	0.0123633
GLP2R	17p13.1	0.737864	0.525547	0.587786	0.00334366	0.075254
GLTPD2	17p13.2	0.728155	0.510949	0.549618	0.00196585	0.0496348
GNB5	15q21.2	0.339806	0.145985	0.10687	1.03276e-05	0.00205563
GOLGA2P10	15q25.2	0.320388	0.131387	0.137405	0.000200479	0.00920224
GOLGA2P11	15q22.2	0.320388	0.124088	0.0992366	9.04859e-06	0.00205563
GOLGA2P7	15q25.2	0.300971	0.145985	0.137405	0.00194466	0.0496348
GOLGA6A	15q24.1	0.320388	0.131387	0.145038	0.000297579	0.0121891
GOLGA6B	15q24.1	0.320388	0.131387	0.129771	0.00012941	0.00710941
GOLGA6C	15q24.2	0.31068	0.138686	0.145038	0.000967573	0.0297828
GOLGA6D	15q24.2	0.31068	0.138686	0.145038	0.000967573	0.0297828
GOLGA6L1	15q11.2	0.31068	0.189781	0.122137	0.00153026	0.0405441
GOLGA6L10	15q25.2	0.320388	0.131387	0.137405	0.000200479	0.00920224
GOLGA6L17P	15q25.2	0.320388	0.131387	0.137405	0.000200479	0.00920224
GOLGA6L2	15q11.2	0.320388	0.182482	0.0992366	0.000104382	0.00620687
GOLGA6L22	15q11.2	0.31068	0.19708	0.122137	0.00170916	0.0451698
GOLGA6L3	15q25.3	0.31068	0.138686	0.145038	0.000967573	0.0297828
GOLGA6L4	15q25.2	0.300971	0.145985	0.137405	0.00194466	0.0496348
GOLGA6L5P	15q25.2	0.31068	0.145985	0.129771	0.000623384	0.0209776
GOLGA6L7P	15q13.1	0.330097	0.167883	0.122137	0.000211273	0.00959253
GOLGA6L9	15q25.2	0.320388	0.131387	0.137405	0.000200479	0.00920224
GOLGA8A	15q14	0.436893	0.248175	0.259542	0.0027047	0.0646994
GOLGA8B	15q14	0.407767	0.218978	0.236641	0.00230506	0.0566948
GOLGA8DP	15q11.2	0.31068	0.189781	0.122137	0.00153026	0.0405441
GOLGA8EP	15q11.2	0.38835	0.255474	0.198473	0.00451436	0.0889738
GOLGA8F	15q13.1	0.349515	0.182482	0.129771	0.000137946	0.00720398
GOLGA8G	15q13.1	0.349515	0.182482	0.129771	0.000137946	0.00720398
GOLGA8J	15q11.2	0.38835	0.240876	0.152672	0.000187636	0.00911231
GOLGA8M	15q13.1	0.330097	0.182482	0.114504	0.000186215	0.00906433
GOLGA8S	15q11.2	0.31068	0.20438	0.114504	0.00102538	0.0304428
GP1BA	17p13.2	0.728155	0.510949	0.549618	0.00196585	0.0496348
GPR176	15q14	0.31068	0.153285	0.145038	0.0020039	0.0503878
GPS2	17p13.1	0.728155	0.518248	0.610687	0.00433284	0.0859468
GRAMD2	15q23	0.330097	0.131387	0.122137	3.41813e-05	0.00300267
GREM1	15q13.3	0.31068	0.160584	0.122137	0.000706485	0.0226454
GSG1L2	17p13.1	0.737864	0.525547	0.587786	0.00334366	0.075254
GSG2	17p13.2	0.718447	0.510949	0.549618	0.00353237	0.0778651
GTF2A2	15q22.2	0.320388	0.124088	0.0992366	9.04859e-06	0.00205563
GUCY2D	17p13.1	0.737864	0.532847	0.610687	0.00525431	0.096204
HACD3	15q22.31	0.330097	0.131387	0.10687	1.08671e-05	0.00205563
HAPLN3	15q26.1	0.31068	0.131387	0.167939	0.00152751	0.0405441
HAUS2	15q15.2	0.330097	0.160584	0.122137	0.00015837	0.00779964
HCN4	15q24.1	0.320388	0.131387	0.137405	0.000200479	0.00920224
HDC	15q21.2	0.320388	0.145985	0.114504	0.00010374	0.00618626
HDDC3	15q26.1	0.31068	0.131387	0.160305	0.00118461	0.0332374
HDGFRP3	15q25.2	0.320388	0.131387	0.129771	0.00012941	0.00710941
HERC1	15q22.31	0.339806	0.124088	0.10687	2.63503e-06	0.00205563
HERC2	15q13.1	0.339806	0.175182	0.129771	0.000225942	0.0101922
HERC2P10	15q13.2	0.320388	0.167883	0.114504	0.000252378	0.0111681
HERC2P2	15q11.2	0.378641	0.240876	0.183206	0.00267877	0.0641524
HERC2P7	15q11.2	0.378641	0.226277	0.19084	0.00289781	0.0682273
HERC2P9	15q13.1	0.330097	0.182482	0.122137	0.000338396	0.0131857
HEXA	15q23	0.330097	0.131387	0.122137	3.41813e-05	0.00300267
HEXA-AS1	15q23	0.330097	0.131387	0.122137	3.41813e-05	0.00300267
HIGD2B	15q24.1	0.320388	0.131387	0.129771	0.00012941	0.00710941
HMG20A	15q24.3	0.330097	0.138686	0.137405	0.000141113	0.00720398
HMGN2P46	15q21.1	0.31068	0.160584	0.114504	0.0004131	0.0145811
HOMER2	15q25.2	0.330097	0.138686	0.137405	0.000141113	0.00720398
HSP90AB4P	15q21.3	0.320388	0.124088	0.0992366	9.04859e-06	0.00205563
HSP90B2P	15q26.3	0.330097	0.167883	0.152672	0.00141996	0.0381042
HSPB2	11q23.1	0.291262	0.313869	0.152672	0.00520997	0.096204
HSPB2-C11orf52	11q23.1	0.291262	0.313869	0.152672	0.00520997	0.096204
HTR3A	11q23.2	0.300971	0.306569	0.152672	0.00561618	0.0984525
HTR3B	11q23.2	0.300971	0.306569	0.152672	0.00561618	0.0984525
HYKK	15q25.1	0.330097	0.138686	0.137405	0.000141113	0.00720398
HYPK	15q15.3	0.339806	0.160584	0.114504	3.9642e-05	0.00317521
ICE2	15q22.2	0.320388	0.138686	0.0992366	2.12312e-05	0.00225579
IDH2	15q26.1	0.320388	0.131387	0.160305	0.000580174	0.0198101
IDH3A	15q25.1	0.330097	0.131387	0.137405	8.94385e-05	0.00550599
IGDCC3	15q22.31	0.320388	0.138686	0.10687	3.98969e-05	0.00317521
IGDCC4	15q22.31	0.320388	0.138686	0.10687	3.98969e-05	0.00317521
IGF1R	15q26.3	0.320388	0.167883	0.152672	0.00276684	0.0656606
IL16	15q25.1	0.330097	0.138686	0.137405	0.000141113	0.00720398
IL18	11q23.1	0.300971	0.306569	0.152672	0.00561618	0.0984525
IMP3	15q24.2	0.31068	0.131387	0.145038	0.000634028	0.0212333
INAFM2	15q15.1	0.320388	0.153285	0.145038	0.000999646	0.0299105
INCA1	17p13.2	0.728155	0.510949	0.549618	0.00196585	0.0496348
INO80	15q15.1	0.320388	0.167883	0.145038	0.00185987	0.0485399
IPW	15q11.2	0.339806	0.175182	0.0992366	1.81688e-05	0.00205563
IQCH	15q23	0.330097	0.145985	0.122137	7.96047e-05	0.00546297
IQCH-AS1	15q23	0.320388	0.138686	0.114504	7.13755e-05	0.00493056
IQGAP1	15q26.1	0.300971	0.131387	0.160305	0.00234507	0.0572751
IRAIN	15q26.3	0.31068	0.167883	0.152672	0.00522746	0.096204
IREB2	15q25.1	0.330097	0.138686	0.137405	0.000141113	0.00720398
ISG20	15q26.1	0.31068	0.131387	0.160305	0.00118461	0.0332374
ISL2	15q24.3	0.320388	0.131387	0.145038	0.000297579	0.0121891
ISLR	15q24.1	0.320388	0.131387	0.152672	0.000423865	0.0148608
ISLR2	15q24.1	0.320388	0.131387	0.145038	0.000297579	0.0121891
ITGA11	15q23	0.339806	0.138686	0.122137	2.26192e-05	0.00228716
ITGAE	17p13.2	0.718447	0.510949	0.549618	0.00353237	0.0778651
ITPKA	15q15.1	0.330097	0.167883	0.129771	0.000361878	0.0138727
IVD	15q15.1	0.320388	0.153285	0.145038	0.000999646	0.0299105
JMJD7	15q15.1	0.330097	0.160584	0.129771	0.000269172	0.0113819
JMJD7-PLA2G4B	15q15.1	0.330097	0.160584	0.129771	0.000269172	0.0113819
KATNBL1	15q14	0.31068	0.160584	0.114504	0.0004131	0.0145811
KBTBD13	15q22.31	0.31068	0.138686	0.10687	9.23754e-05	0.00558818
KCNAB3	17p13.1	0.737864	0.532847	0.603053	0.00512823	0.096204
KCTD11	17p13.1	0.728155	0.518248	0.610687	0.00433284	0.0859468
KDM6B	17p13.1	0.737864	0.532847	0.603053	0.00512823	0.096204
KIAA0101	15q22.31	0.339806	0.131387	0.10687	4.33656e-06	0.00205563
KIAA0753	17p13.1	0.728155	0.518248	0.580153	0.00396636	0.0819544
KIAA1024	15q25.1	0.330097	0.131387	0.137405	8.94385e-05	0.00550599
KIF1C	17p13.2	0.728155	0.510949	0.549618	0.00196585	0.0496348
KIF23	15q23	0.339806	0.124088	0.114504	4.86615e-06	0.00205563
KIF7	15q26.1	0.31068	0.131387	0.160305	0.00118461	0.0332374
KLF13	15q13.3	0.31068	0.160584	0.114504	0.0004131	0.0145811
KLHL25	15q25.3	0.31068	0.145985	0.145038	0.0014193	0.0381042
KNL1	15q15.1	0.320388	0.153285	0.145038	0.000999646	0.0299105
KNSTRN	15q15.1	0.320388	0.153285	0.145038	0.000999646	0.0299105
LACTB	15q22.2	0.339806	0.138686	0.114504	1.27289e-05	0.00205563
LARP6	15q23	0.330097	0.138686	0.114504	3.05698e-05	0.00286931
LCMT2	15q15.3	0.330097	0.160584	0.122137	0.00015837	0.00779964
LCTL	15q22.31	0.31068	0.131387	0.10687	6.2772e-05	0.00436505
LDHAL6B	15q22.2	0.320388	0.124088	0.0992366	9.04859e-06	0.00205563
LEO1	15q21.2	0.339806	0.145985	0.10687	1.03276e-05	0.00205563
LINC00052	15q25.3	0.31068	0.138686	0.160305	0.00183969	0.0484359
LINC00593	15q23	0.339806	0.145985	0.114504	1.93351e-05	0.00212967
LINC00597	15q24.3	0.330097	0.131387	0.137405	8.94385e-05	0.00550599
LINC00670	17p12	0.708738	0.510949	0.534351	0.00470709	0.0919926
LINC00923	15q26.2	0.320388	0.167883	0.152672	0.00276684	0.0656606
LINC00924	15q26.2	0.31068	0.160584	0.152672	0.00394244	0.0819544
LINC00926	15q21.3	0.320388	0.131387	0.0992366	1.41683e-05	0.00205563
LINC00927	15q25.1	0.330097	0.131387	0.137405	8.94385e-05	0.00550599
LINC00928	15q26.1	0.31068	0.131387	0.160305	0.00118461	0.0332374
LINC00929	15q12	0.339806	0.167883	0.0992366	1.40966e-05	0.00205563
LINC00930	15q26.1	0.31068	0.167883	0.152672	0.00522746	0.096204
LINC00933	15q25.2	0.31068	0.145985	0.129771	0.000623384	0.0209776
LINC01169	15q22.31	0.31068	0.131387	0.10687	6.2772e-05	0.00436505
LINC01197	15q26.2	0.31068	0.160584	0.152672	0.00394244	0.0819544
LINC01314	15q25.1	0.330097	0.131387	0.137405	8.94385e-05	0.00550599
LINC01413	15q21.3	0.320388	0.131387	0.10687	2.64908e-05	0.00252036
LINC01491	15q21.1	0.320388	0.160584	0.114504	0.000194804	0.00920224
LINC01578	15q26.1	0.31068	0.167883	0.152672	0.00522746	0.096204
LINC01579	15q26.2	0.31068	0.153285	0.152672	0.00286982	0.0677207
LINC01580	15q26.2	0.31068	0.153285	0.152672	0.00286982	0.0677207
LINC01581	15q26.2	0.31068	0.153285	0.152672	0.00286982	0.0677207
LINC01582	15q26.3	0.31068	0.167883	0.152672	0.00522746	0.096204
LINC01583	15q25.2	0.320388	0.131387	0.137405	0.000200479	0.00920224
LINC01584	15q25.3	0.31068	0.138686	0.145038	0.000967573	0.0297828
LINC01585	15q26.1	0.300971	0.131387	0.160305	0.00234507	0.0572751
LINC01586	15q26.1	0.31068	0.131387	0.160305	0.00118461	0.0332374
LINGO1	15q24.3	0.330097	0.138686	0.137405	0.000141113	0.00720398
LINGO1-AS1	15q24.3	0.330097	0.138686	0.137405	0.000141113	0.00720398
LINGO1-AS2	15q24.3	0.330097	0.138686	0.137405	0.000141113	0.00720398
LINS1	15q26.3	0.320388	0.175182	0.152672	0.00361539	0.0778651
LIPC	15q21.3	0.339806	0.131387	0.0992366	2.2258e-06	0.00205563
LIPC-AS1	15q21.3	0.339806	0.131387	0.0992366	2.2258e-06	0.00205563
LMAN1L	15q24.1	0.320388	0.145985	0.152672	0.00100459	0.0299105
LOC100128108	15q26.3	0.330097	0.189781	0.160305	0.0045666	0.0898062
LOC100128714	15q12	0.339806	0.167883	0.0992366	1.40966e-05	0.00205563
LOC100129973	15q21.2	0.339806	0.145985	0.10687	1.03276e-05	0.00205563
LOC100130111	15q13.1	0.349515	0.160584	0.129771	5.57126e-05	0.00409422
LOC100130950	17p13.2	0.718447	0.518248	0.557252	0.0052627	0.096204
LOC100131315	15q13.3	0.31068	0.160584	0.122137	0.000706485	0.0226454
LOC100132686	11q23.1	0.300971	0.306569	0.152672	0.00561618	0.0984525
LOC100287015	8p23.1	0.728155	0.576642	0.748092	0.00499014	0.096204
LOC100289656	15q13.1	0.330097	0.167883	0.122137	0.000211273	0.00959253
LOC100419583	15q21.1	0.31068	0.160584	0.0992366	0.000122863	0.00700719
LOC100422556	15q21.2	0.320388	0.145985	0.10687	5.76322e-05	0.00410306
LOC100507472	15q26.3	0.320388	0.189781	0.152672	0.00559175	0.0984525
LOC100996255	15q13.3	0.31068	0.182482	0.137405	0.00359712	0.0778651
LOC100996842	17p13.1	0.737864	0.532847	0.603053	0.00512823	0.096204
LOC101559451	17p13.2	0.728155	0.510949	0.557252	0.0022242	0.0547703
LOC101926911	15q26.1	0.31068	0.138686	0.160305	0.00183969	0.0484359
LOC101927153	15q26.2	0.31068	0.153285	0.160305	0.00395346	0.0819544
LOC101927286	15q26.2	0.31068	0.167883	0.152672	0.00522746	0.096204
LOC101927310	15q26.2	0.31068	0.167883	0.152672	0.00522746	0.096204
LOC101927727	17p13.3	0.708738	0.50365	0.557252	0.00509078	0.096204
LOC101927751	15q26.3	0.320388	0.175182	0.152672	0.00361539	0.0778651
LOC101927839	17p13.3	0.708738	0.50365	0.534351	0.00363384	0.0778651
LOC101927911	17p13.3	0.718447	0.510949	0.549618	0.00353237	0.0778651
LOC101928000	17p13.2	0.718447	0.518248	0.557252	0.0052627	0.096204
LOC101928042	15q13.1	0.330097	0.19708	0.145038	0.00233719	0.0572751
LOC101928134	15q13.3	0.31068	0.160584	0.122137	0.000706485	0.0226454
LOC101928174	15q14	0.31068	0.160584	0.114504	0.0004131	0.0145811
LOC101928227	15q14	0.31068	0.145985	0.122137	0.000387351	0.0145811
LOC101928266	17p13.1	0.737864	0.525547	0.587786	0.00334366	0.075254
LOC101928414	15q21.1	0.31068	0.160584	0.114504	0.0004131	0.0145811
LOC101928418	17p12	0.708738	0.50365	0.534351	0.00363384	0.0778651
LOC101928725	15q21.3	0.320388	0.124088	0.0992366	9.04859e-06	0.00205563
LOC101928823	11q23.1	0.31068	0.306569	0.152672	0.00438354	0.0864768
LOC101928907	15q22.2	0.320388	0.124088	0.0992366	9.04859e-06	0.00205563
LOC101928940	11q23.2	0.300971	0.306569	0.152672	0.00561618	0.0984525
LOC101928988	15q22.31	0.330097	0.124088	0.114504	1.22109e-05	0.00205563
LOC101929011	11q23.3	0.300971	0.313869	0.152672	0.0042829	0.0858673
LOC101929076	15q23	0.320388	0.138686	0.122137	0.000121792	0.00700719
LOC101929151	15q23	0.330097	0.145985	0.114504	4.54291e-05	0.00353486
LOC101929439	15q24.2	0.320388	0.131387	0.145038	0.000297579	0.0121891
LOC101929457	15q24.3	0.330097	0.138686	0.137405	0.000141113	0.00720398
LOC101929586	15q25.1	0.330097	0.131387	0.137405	8.94385e-05	0.00550599
LOC101929679	15q25.3	0.31068	0.145985	0.145038	0.0014193	0.0381042
LOC102723335	15q26.3	0.320388	0.175182	0.152672	0.00361539	0.0778651
LOC102723344	15q22.2	0.330097	0.131387	0.10687	1.08671e-05	0.00205563
LOC102723481	15q22.32	0.31068	0.145985	0.10687	0.000130394	0.00714469
LOC102723493	15q22.32	0.339806	0.167883	0.114504	5.36507e-05	0.00396807
LOC102723640	15q24.1	0.320388	0.131387	0.129771	0.00012941	0.00710941
LOC102724009	17p13.2	0.718447	0.510949	0.549618	0.00353237	0.0778651
LOC102724034	15q25.2	0.320388	0.145985	0.137405	0.00046013	0.0160784
LOC102724452	15q25.3	0.31068	0.138686	0.145038	0.000967573	0.0297828
LOC102725022	15q13.3	0.31068	0.160584	0.114504	0.0004131	0.0145811
LOC103021295|chr17	17p13.2	0.718447	0.510949	0.557252	0.00395731	0.0819544
LOC103171574	15q25.2	0.31068	0.145985	0.129771	0.000623384	0.0209776
LOC104613533	15q26.1	0.31068	0.167883	0.152672	0.00522746	0.096204
LOC105369507	11q23.3	0.300971	0.306569	0.152672	0.00561618	0.0984525
LOC105369509	11q23.3	0.300971	0.306569	0.152672	0.00561618	0.0984525
LOC105370757	15q13.3	0.31068	0.160584	0.122137	0.000706485	0.0226454
LOC105370792	15q15.1	0.330097	0.160584	0.129771	0.000269172	0.0113819
LOC105370802	15q21.1	0.31068	0.167883	0.114504	0.000523414	0.0181986
LOC105370829	15q21.3	0.31068	0.131387	0.0916031	1.77776e-05	0.00205563
LOC105370888	15q24.1	0.330097	0.131387	0.122137	3.41813e-05	0.00300267
LOC105370941	15q14	0.31068	0.153285	0.137405	0.00134419	0.0373643
LOC105370943	15q15.1	0.320388	0.160584	0.145038	0.00138811	0.0378314
LOC105370954	15q25.3	0.31068	0.138686	0.145038	0.000967573	0.0297828
LOC105371506	17p13.2	0.728155	0.518248	0.557252	0.00298833	0.0696534
LOC105371592	17p13.3	0.718447	0.510949	0.549618	0.00353237	0.0778651
LOC105376731	15q24.2	0.31068	0.138686	0.152672	0.00136075	0.0376745
LOC145694	15q23	0.339806	0.124088	0.114504	4.86615e-06	0.00205563
LOC145783	15q21.3	0.320388	0.124088	0.0992366	9.04859e-06	0.00205563
LOC145845	15q14	0.300971	0.145985	0.122137	0.000816869	0.0260638
LOC283140	11q23.1	0.31068	0.306569	0.152672	0.00438354	0.0864768
LOC283683	15q11.2	0.31068	0.182482	0.122137	0.00132694	0.036983
LOC283710	15q13.3	0.31068	0.160584	0.114504	0.0004131	0.0145811
LOC283731	15q24.1	0.320388	0.131387	0.145038	0.000297579	0.0121891
LOC284009	17p13.3	0.718447	0.50365	0.534351	0.00202456	0.0503878
LOC284023	17p13.1	0.737864	0.532847	0.603053	0.00512823	0.096204
LOC338963	15q25.2	0.320388	0.138686	0.137405	0.000309849	0.0123633
LOC339166	17p13.2	0.728155	0.510949	0.580153	0.00285074	0.0674986
LOC387810	11q23.1	0.31068	0.306569	0.152672	0.00438354	0.0864768
LOC440300	15q25.2	0.300971	0.145985	0.137405	0.00194466	0.0496348
LOC440311	15q26.2	0.31068	0.160584	0.152672	0.00394244	0.0819544
LOC642423	15q25.2	0.300971	0.145985	0.152672	0.0039138	0.0819544
LOC645752	15q24.3	0.330097	0.131387	0.137405	8.94385e-05	0.00550599
LOC646522	11q25	0.291262	0.343066	0.160305	0.0024216	0.0590063
LOC646938	15q25.1	0.330097	0.131387	0.137405	8.94385e-05	0.00550599
LOC727751	15q25.2	0.320388	0.131387	0.137405	0.000200479	0.00920224
LOC728392	17p13.2	0.728155	0.518248	0.557252	0.00298833	0.0696534
LOC729739	15q24.1	0.330097	0.131387	0.152672	0.000197233	0.00920224
LOC91450	15q24.3	0.330097	0.131387	0.137405	8.94385e-05	0.00550599
LOXL1	15q24.1	0.320388	0.131387	0.145038	0.000297579	0.0121891
LOXL1-AS1	15q24.1	0.320388	0.131387	0.145038	0.000297579	0.0121891
LPCAT4	15q14	0.31068	0.160584	0.114504	0.0004131	0.0145811
LRRC28	15q26.3	0.330097	0.167883	0.152672	0.00141996	0.0381042
LRRC49	15q23	0.330097	0.131387	0.114504	1.9739e-05	0.00212967
LRRC57	15q15.2	0.330097	0.160584	0.129771	0.000269172	0.0113819
LRRK1	15q26.3	0.320388	0.189781	0.152672	0.00559175	0.0984525
LTK	15q15.1	0.330097	0.167883	0.129771	0.000361878	0.0138727
LUNAR1	15q26.3	0.320388	0.167883	0.152672	0.00276684	0.0656606
LYSMD2	15q21.2	0.320388	0.145985	0.10687	5.76322e-05	0.00410306
LYSMD4	15q26.3	0.320388	0.167883	0.152672	0.00276684	0.0656606
MAGEL2	15q11.2	0.330097	0.182482	0.0992366	4.92972e-05	0.00377963
MAN2A2	15q26.1	0.31068	0.131387	0.160305	0.00118461	0.0332374
MAN2C1	15q24.2	0.31068	0.138686	0.145038	0.000967573	0.0297828
MAP1A	15q15.3	0.339806	0.167883	0.114504	5.36507e-05	0.00396807
MAP2K1	15q22.31	0.320388	0.124088	0.10687	1.68429e-05	0.00205563
MAP2K5	15q23	0.320388	0.138686	0.122137	0.000121792	0.00700719
MAPK6	15q21.2	0.339806	0.145985	0.10687	1.03276e-05	0.00205563
MAPKBP1	15q15.1	0.330097	0.160584	0.129771	0.000269172	0.0113819
MCTP2	15q26.2	0.31068	0.160584	0.152672	0.00394244	0.0819544
MED11	17p13.2	0.728155	0.510949	0.557252	0.0022242	0.0547703
MED31	17p13.1	0.728155	0.518248	0.580153	0.00396636	0.0819544
MEF2A	15q26.3	0.320388	0.167883	0.152672	0.00276684	0.0656606
MEGF11	15q22.31	0.320388	0.131387	0.10687	2.64908e-05	0.00252036
MEIS2	15q14	0.31068	0.145985	0.122137	0.000387351	0.0145811
MESDC1	15q25.1	0.330097	0.138686	0.137405	0.000141113	0.00720398
MESDC2	15q25.1	0.330097	0.138686	0.137405	0.000141113	0.00720398
MESP1	15q26.1	0.31068	0.131387	0.160305	0.00118461	0.0332374
MESP2	15q26.1	0.31068	0.131387	0.160305	0.00118461	0.0332374
METTL16	17p13.3	0.718447	0.50365	0.534351	0.00202456	0.0503878
MEX3B	15q25.2	0.330097	0.131387	0.137405	8.94385e-05	0.00550599
MFAP1	15q15.3	0.339806	0.160584	0.114504	3.9642e-05	0.00317521
MFGE8	15q26.1	0.31068	0.131387	0.167939	0.00152751	0.0405441
MFSD6L	17p13.1	0.737864	0.532847	0.59542	0.00490122	0.0953414
MGA	15q15.1	0.330097	0.160584	0.129771	0.000269172	0.0113819
MGC15885	15q22.2	0.320388	0.131387	0.0992366	1.41683e-05	0.00205563
MINK1	17p13.2	0.728155	0.510949	0.549618	0.00196585	0.0496348
MIPOL1	14q13.3	0.339806	0.226277	0.160305	0.00542985	0.0984525
MIR1179	15q26.1	0.31068	0.131387	0.160305	0.00118461	0.0332374
MIR1233-1	15q14	0.417476	0.233577	0.244275	0.00301136	0.0700342
MIR1233-2	15q14	0.417476	0.233577	0.244275	0.00301136	0.0700342
MIR1253	17p13.3	0.718447	0.510949	0.549618	0.00353237	0.0778651
MIR1266	15q21.2	0.339806	0.145985	0.10687	1.03276e-05	0.00205563
MIR1272	15q22.31	0.330097	0.138686	0.10687	1.67442e-05	0.00205563
MIR1276	15q25.3	0.31068	0.145985	0.145038	0.0014193	0.0381042
MIR1282	15q15.3	0.339806	0.160584	0.114504	3.9642e-05	0.00317521
MIR1302-10|chr15	15q26.3	0.339806	0.189781	0.167939	0.00361014	0.0778651
MIR1302-11|chr15	15q26.3	0.339806	0.189781	0.167939	0.00361014	0.0778651
MIR1302-2|chr15	15q26.3	0.339806	0.189781	0.167939	0.00361014	0.0778651
MIR1302-9|chr15	15q26.3	0.339806	0.189781	0.167939	0.00361014	0.0778651
MIR1469	15q26.2	0.31068	0.167883	0.152672	0.00522746	0.096204
MIR147B	15q21.1	0.300971	0.160584	0.114504	0.000849611	0.0269442
MIR184	15q25.1	0.330097	0.131387	0.137405	8.94385e-05	0.00550599
MIR190A	15q22.2	0.320388	0.131387	0.0992366	1.41683e-05	0.00205563
MIR195	17p13.1	0.728155	0.518248	0.587786	0.00418363	0.0841187
MIR211	15q13.3	0.31068	0.160584	0.10687	0.000230718	0.010253
MIR2116	15q22.2	0.320388	0.124088	0.0992366	9.04859e-06	0.00205563
MIR22	17p13.3	0.699029	0.50365	0.526718	0.00548451	0.0984525
MIR22HG	17p13.3	0.699029	0.50365	0.526718	0.00548451	0.0984525
MIR3174	15q26.1	0.31068	0.131387	0.152672	0.000884057	0.0278259
MIR3175	15q26.1	0.31068	0.167883	0.152672	0.00522746	0.096204
MIR3183	17p13.3	0.708738	0.50365	0.564885	0.00547036	0.0984525
MIR324	17p13.1	0.728155	0.518248	0.587786	0.00418363	0.0841187
MIR3529	15q26.1	0.31068	0.131387	0.160305	0.00118461	0.0332374
MIR3942	15q14	0.31068	0.160584	0.114504	0.0004131	0.0145811
MIR422A	15q22.31	0.330097	0.124088	0.10687	6.75334e-06	0.00205563
MIR4283-1	7p11.2	0.106796	0.0875912	0.00763359	0.00359938	0.0778651
MIR4283-2	7p11.2	0.106796	0.0875912	0.00763359	0.00359938	0.0778651
MIR4310	15q15.1	0.330097	0.160584	0.129771	0.000269172	0.0113819
MIR4311	15q22.31	0.320388	0.131387	0.10687	2.64908e-05	0.00252036
MIR4312	15q23	0.339806	0.138686	0.122137	2.26192e-05	0.00228716
MIR4313	15q24.2	0.31068	0.124088	0.145038	0.000398762	0.0145811
MIR4314	17p13.1	0.737864	0.532847	0.610687	0.00525431	0.096204
MIR4508	15q11.2	0.330097	0.182482	0.0992366	4.92972e-05	0.00377963
MIR4509-1	15q11.2	0.339806	0.218978	0.129771	0.000617477	0.0209776
MIR4509-2	15q11.2	0.339806	0.218978	0.129771	0.000617477	0.0209776
MIR4510	15q14	0.31068	0.145985	0.122137	0.000387351	0.0145811
MIR4511	15q22.31	0.320388	0.131387	0.10687	2.64908e-05	0.00252036
MIR4512	15q22.31	0.320388	0.124088	0.10687	1.68429e-05	0.00205563
MIR4513	15q24.1	0.320388	0.145985	0.152672	0.00100459	0.0299105
MIR4514	15q25.1	0.330097	0.138686	0.137405	0.000141113	0.00720398
MIR4515	15q25.2	0.320388	0.131387	0.129771	0.00012941	0.00710941
MIR4520-1	17p13.1	0.728155	0.518248	0.580153	0.00396636	0.0819544
MIR4520-2	17p13.1	0.728155	0.518248	0.580153	0.00396636	0.0819544
MIR4697	11q25	0.291262	0.335766	0.160305	0.00346011	0.0777076
MIR4697HG	11q25	0.291262	0.335766	0.160305	0.00346011	0.0777076
MIR4712	15q21.2	0.31068	0.145985	0.114504	0.000230069	0.010253
MIR4713	15q21.2	0.31068	0.153285	0.114504	0.000314235	0.0123633
MIR4714	15q26.3	0.31068	0.167883	0.152672	0.00522746	0.096204
MIR4715	15q12	0.339806	0.167883	0.0992366	1.40966e-05	0.00205563
MIR4716	15q21.1	0.320388	0.160584	0.114504	0.000194804	0.00920224
MIR497	17p13.1	0.728155	0.518248	0.587786	0.00418363	0.0841187
MIR497HG	17p13.1	0.728155	0.518248	0.587786	0.00418363	0.0841187
MIR5009	15q26.1	0.31068	0.131387	0.160305	0.00118461	0.0332374
MIR5094	15q26.1	0.31068	0.131387	0.160305	0.00118461	0.0332374
MIR5096|chr17	17p13.2	0.718447	0.510949	0.557252	0.00395731	0.0819544
MIR548AP	15q25.3	0.31068	0.145985	0.145038	0.0014193	0.0381042
MIR549A	15q25.1	0.330097	0.138686	0.137405	0.000141113	0.00720398
MIR5572	15q25.1	0.330097	0.131387	0.137405	8.94385e-05	0.00550599
MIR6085	15q22.2	0.320388	0.131387	0.10687	2.64908e-05	0.00252036
MIR626	15q15.1	0.330097	0.167883	0.129771	0.000361878	0.0138727
MIR627	15q15.1	0.330097	0.160584	0.129771	0.000269172	0.0113819
MIR628	15q21.3	0.31068	0.131387	0.0916031	1.77776e-05	0.00205563
MIR629	15q23	0.330097	0.145985	0.114504	4.54291e-05	0.00353486
MIR630	15q24.1	0.320388	0.131387	0.129771	0.00012941	0.00710941
MIR631	15q24.2	0.31068	0.138686	0.145038	0.000967573	0.0297828
MIR6766	15q26.1	0.31068	0.131387	0.160305	0.00118461	0.0332374
MIR6776	17p13.3	0.718447	0.510949	0.549618	0.00353237	0.0778651
MIR6859-1|chr15	15q26.3	0.339806	0.189781	0.167939	0.00361014	0.0778651
MIR6859-2|chr15	15q26.3	0.339806	0.189781	0.167939	0.00361014	0.0778651
MIR6859-3|chr15	15q26.3	0.339806	0.189781	0.167939	0.00361014	0.0778651
MIR6864	17p13.2	0.728155	0.510949	0.549618	0.00196585	0.0496348
MIR6865	17p13.2	0.728155	0.510949	0.549618	0.00196585	0.0496348
MIR6881	15q24.1	0.330097	0.131387	0.152672	0.000197233	0.00920224
MIR6882	15q24.1	0.320388	0.138686	0.152672	0.000665463	0.021832
MIR7-2	15q26.1	0.31068	0.131387	0.160305	0.00118461	0.0332374
MIR7706	15q25.3	0.31068	0.153285	0.145038	0.0020039	0.0503878
MIR7973-1	15q21.2	0.31068	0.153285	0.114504	0.000314235	0.0123633
MIR7973-2	15q21.2	0.31068	0.153285	0.114504	0.000314235	0.0123633
MIR8063	15q14	0.300971	0.145985	0.122137	0.000816869	0.0260638
MIR8067	15q22.2	0.320388	0.131387	0.10687	2.64908e-05	0.00252036
MIR9-3	15q26.1	0.31068	0.131387	0.160305	0.00118461	0.0332374
MIR9-3HG	15q26.1	0.31068	0.131387	0.160305	0.00118461	0.0332374
MIS12	17p13.2	0.728155	0.518248	0.557252	0.00298833	0.0696534
MKRN3	15q11.2	0.330097	0.182482	0.0992366	4.92972e-05	0.00377963
MNS1	15q21.3	0.31068	0.131387	0.10687	6.2772e-05	0.00436505
MNT	17p13.3	0.718447	0.50365	0.534351	0.00202456	0.0503878
MORF4L1	15q25.1	0.330097	0.131387	0.137405	8.94385e-05	0.00550599
MPDU1	17p13.1	0.737864	0.532847	0.603053	0.00512823	0.096204
MPI	15q24.1	0.320388	0.138686	0.152672	0.000665463	0.021832
MRPL42P5	15q15.1	0.320388	0.145985	0.145038	0.000693786	0.0226194
MRPL46	15q25.3	0.31068	0.131387	0.160305	0.00118461	0.0332374
MRPS11	15q25.3	0.31068	0.131387	0.160305	0.00118461	0.0332374
MTFMT	15q22.31	0.320388	0.138686	0.10687	3.98969e-05	0.00317521
MTHFS	15q25.1	0.330097	0.131387	0.137405	8.94385e-05	0.00550599
MTMR10	15q13.3	0.31068	0.160584	0.10687	0.000230718	0.010253
MYBBP1A	17p13.2	0.718447	0.510949	0.557252	0.00395731	0.0819544
MYEF2	15q21.1	0.320388	0.160584	0.122137	0.000339548	0.0131857
MYH10	17p13.1	0.737864	0.532847	0.603053	0.00512823	0.096204
MYH13	17p13.1	0.728155	0.525547	0.580153	0.00541973	0.0984525
MYO1E	15q22.2	0.320388	0.124088	0.0992366	9.04859e-06	0.00205563
MYO5A	15q21.2	0.330097	0.153285	0.10687	3.51242e-05	0.00306327
MYO5C	15q21.2	0.339806	0.145985	0.10687	1.03276e-05	0.00205563
MYO9A	15q23	0.330097	0.131387	0.122137	3.41813e-05	0.00300267
MYOCD	17p12	0.708738	0.50365	0.534351	0.00363384	0.0778651
MYZAP	15q21.3	0.31068	0.138686	0.0992366	5.0172e-05	0.00380489
NAA38	17p13.1	0.737864	0.532847	0.603053	0.00512823	0.096204
NCBP3	17p13.2	0.718447	0.510949	0.557252	0.00395731	0.0819544
NDN	15q11.2	0.330097	0.182482	0.0992366	4.92972e-05	0.00377963
NDUFAF1	15q15.1	0.320388	0.167883	0.137405	0.00120181	0.0335848
NDUFAF4P1	15q21.1	0.320388	0.160584	0.114504	0.000194804	0.00920224
NEDD4	15q21.3	0.31068	0.131387	0.0992366	3.42859e-05	0.00300267
NEIL1	15q24.2	0.31068	0.138686	0.145038	0.000967573	0.0297828
NEO1	15q24.1	0.320388	0.131387	0.129771	0.00012941	0.00710941
NEURL4	17p13.1	0.728155	0.518248	0.610687	0.00433284	0.0859468
NGRN	15q26.1	0.320388	0.131387	0.160305	0.000580174	0.0198101
NIPA1	15q11.2	0.31068	0.182482	0.122137	0.00132694	0.036983
NIPA2	15q11.2	0.300971	0.182482	0.122137	0.00250736	0.0608128
NLGN2	17p13.1	0.737864	0.518248	0.610687	0.00255172	0.0611798
NLRP1	17p13.2	0.728155	0.510949	0.564885	0.00246593	0.0599469
NMB	15q25.2	0.31068	0.153285	0.129771	0.000864959	0.0272657
NNMT	11q23.2	0.300971	0.306569	0.152672	0.00561618	0.0984525
NOP10	15q14	0.31068	0.160584	0.114504	0.0004131	0.0145811
NOX5	15q23	0.339806	0.138686	0.122137	2.26192e-05	0.00228716
NPAP1	15q11.2	0.339806	0.175182	0.0992366	1.81688e-05	0.00205563
NPTN	15q24.1	0.320388	0.131387	0.137405	0.000200479	0.00920224
NPTN-IT1	15q24.1	0.320388	0.131387	0.137405	0.000200479	0.00920224
NR2E3	15q23	0.330097	0.131387	0.122137	3.41813e-05	0.00300267
NR2F2	15q26.2	0.31068	0.167883	0.152672	0.00522746	0.096204
NR2F2-AS1	15q26.2	0.31068	0.160584	0.152672	0.00394244	0.0819544
NRG4	15q24.2	0.320388	0.124088	0.145038	0.000183395	0.00894787
NSMCE3	15q13.1	0.349515	0.167883	0.129771	7.8055e-05	0.00537424
NTN1	17p13.1	0.737864	0.525547	0.587786	0.00334366	0.075254
NTRK3	15q25.3	0.31068	0.131387	0.160305	0.00118461	0.0332374
NTRK3-AS1	15q25.3	0.31068	0.131387	0.160305	0.00118461	0.0332374
NUP88	17p13.2	0.728155	0.518248	0.557252	0.00298833	0.0696534
NUSAP1	15q15.1	0.320388	0.167883	0.137405	0.00120181	0.0335848
NUTM1	15q14	0.31068	0.160584	0.114504	0.0004131	0.0145811
NXPE1	11q23.2	0.300971	0.306569	0.152672	0.00561618	0.0984525
NXPE2	11q23.3	0.300971	0.306569	0.152672	0.00561618	0.0984525
NXPE4	11q23.2	0.300971	0.306569	0.152672	0.00561618	0.0984525
OAZ2	15q22.31	0.330097	0.138686	0.10687	1.67442e-05	0.00205563
OCA2	15q12	0.339806	0.175182	0.129771	0.000225942	0.0101922
ODF3L1	15q24.2	0.31068	0.124088	0.145038	0.000398762	0.0145811
OIP5	15q15.1	0.320388	0.167883	0.145038	0.00185987	0.0485399
OIP5-AS1	15q15.1	0.320388	0.167883	0.145038	0.00185987	0.0485399
ONECUT1	15q21.3	0.330097	0.145985	0.0916031	6.33609e-06	0.00205563
OR1A1	17p13.3	0.718447	0.510949	0.541985	0.00309005	0.0706089
OR1A2	17p13.3	0.718447	0.510949	0.541985	0.00309005	0.0706089
OR1D2	17p13.3	0.718447	0.510949	0.549618	0.00353237	0.0778651
OR1D4	17p13.3	0.718447	0.510949	0.541985	0.00309005	0.0706089
OR1D5	17p13.3	0.718447	0.510949	0.549618	0.00353237	0.0778651
OR1E1	17p13.3	0.718447	0.510949	0.541985	0.00309005	0.0706089
OR1E2	17p13.2	0.718447	0.510949	0.541985	0.00309005	0.0706089
OR1G1	17p13.3	0.718447	0.510949	0.541985	0.00309005	0.0706089
OR3A1	17p13.3	0.718447	0.510949	0.541985	0.00309005	0.0706089
OR3A2	17p13.3	0.718447	0.510949	0.541985	0.00309005	0.0706089
OR3A3	17p13.2	0.718447	0.510949	0.541985	0.00309005	0.0706089
OR3A4P	17p13.3	0.718447	0.510949	0.541985	0.00309005	0.0706089
OR4F13P	15q26.3	0.339806	0.182482	0.160305	0.00190932	0.0496348
OR4F15	15q26.3	0.339806	0.182482	0.160305	0.00190932	0.0496348
OR4F4	15q26.3	0.339806	0.189781	0.167939	0.00361014	0.0778651
OR4F6	15q26.3	0.339806	0.189781	0.160305	0.0024511	0.0596558
OTUD7A	15q13.3	0.31068	0.160584	0.114504	0.0004131	0.0145811
P2RX1	17p13.2	0.718447	0.510949	0.564885	0.00434436	0.0859468
P2RX5	17p13.2	0.718447	0.510949	0.549618	0.00353237	0.0778651
P2RX5-TAX1BP3	17p13.2	0.718447	0.510949	0.549618	0.00353237	0.0778651
PAFAH1B1	17p13.3	0.718447	0.510949	0.549618	0.00353237	0.0778651
PAK6	15q15.1	0.320388	0.153285	0.145038	0.000999646	0.0299105
PAQR5	15q23	0.339806	0.124088	0.114504	4.86615e-06	0.00205563
PARP16	15q22.31	0.320388	0.138686	0.10687	3.98969e-05	0.00317521
PARP6	15q23	0.330097	0.131387	0.122137	3.41813e-05	0.00300267
PATL2	15q21.1	0.31068	0.160584	0.0992366	0.000122863	0.00700719
PCAT29	15q23	0.339806	0.131387	0.114504	8.04072e-06	0.00205563
PCSK6-AS1	15q26.3	0.320388	0.182482	0.152672	0.00456947	0.0898062
PDCD6IPP2	15q13.1	0.330097	0.167883	0.129771	0.000361878	0.0138727
PDCD7	15q22.31	0.31068	0.138686	0.10687	9.23754e-05	0.00558818
PDE8A	15q25.3	0.320388	0.145985	0.145038	0.000693786	0.0226194
PDIA3	15q15.3	0.339806	0.160584	0.114504	3.9642e-05	0.00317521
PEAK1	15q24.3	0.330097	0.131387	0.137405	8.94385e-05	0.00550599
PELP1	17p13.2	0.728155	0.510949	0.557252	0.0022242	0.0547703
PEX11A	15q26.1	0.31068	0.131387	0.160305	0.00118461	0.0332374
PFN1	17p13.2	0.728155	0.510949	0.549618	0.00196585	0.0496348
PGBD4	15q14	0.31068	0.160584	0.114504	0.0004131	0.0145811
PGPEP1L	15q26.3	0.320388	0.167883	0.152672	0.00276684	0.0656606
PHF23	17p13.1	0.728155	0.518248	0.587786	0.00418363	0.0841187
PHGR1	15q15.1	0.320388	0.153285	0.145038	0.000999646	0.0299105
PIAS1	15q23	0.330097	0.138686	0.122137	5.32384e-05	0.00396807
PIF1	15q22.31	0.330097	0.138686	0.10687	1.67442e-05	0.00205563
PIGB	15q21.3	0.31068	0.131387	0.0916031	1.77776e-05	0.00205563
PIGBOS1	15q21.3	0.31068	0.131387	0.0916031	1.77776e-05	0.00205563
PIH1D2	11q23.1	0.300971	0.306569	0.152672	0.00561618	0.0984525
PIK3R5	17p13.1	0.737864	0.532847	0.59542	0.00490122	0.0953414
PIK3R6	17p13.1	0.737864	0.532847	0.603053	0.00512823	0.096204
PIN4P1	15q15.3	0.339806	0.160584	0.114504	3.9642e-05	0.00317521
PITPNM3	17p13.2	0.728155	0.518248	0.572519	0.00368369	0.078357
PKM	15q23	0.330097	0.131387	0.122137	3.41813e-05	0.00300267
PLA2G4B	15q15.1	0.330097	0.160584	0.129771	0.000269172	0.0113819
PLA2G4D	15q15.1	0.330097	0.160584	0.129771	0.000269172	0.0113819
PLA2G4E	15q15.1	0.330097	0.160584	0.129771	0.000269172	0.0113819
PLA2G4E-AS1	15q15.1	0.330097	0.160584	0.129771	0.000269172	0.0113819
PLA2G4F	15q15.1	0.330097	0.160584	0.129771	0.000269172	0.0113819
PLCB2	15q15.1	0.320388	0.153285	0.145038	0.000999646	0.0299105
PLD2	17p13.2	0.728155	0.510949	0.549618	0.00196585	0.0496348
PLD6	17p11.2	0.61165	0.40146	0.480916	0.00541885	0.0984525
PLEKHO2	15q22.31	0.330097	0.138686	0.10687	1.67442e-05	0.00205563
PLET1	11q23.1	0.300971	0.306569	0.152672	0.00561618	0.0984525
PLIN1	15q26.1	0.31068	0.131387	0.160305	0.00118461	0.0332374
PLSCR3	17p13.1	0.728155	0.518248	0.610687	0.00433284	0.0859468
PML	15q24.1	0.320388	0.131387	0.145038	0.000297579	0.0121891
PMS2CL	7p22.1	0.106796	0.080292	0.00763359	0.00408458	0.0841187
POLG	15q26.1	0.31068	0.131387	0.167939	0.00152751	0.0405441
POLR2A	17p13.1	0.737864	0.525547	0.603053	0.00364941	0.0778651
POLR2M	15q21.3	0.31068	0.138686	0.0992366	5.0172e-05	0.00380489
POU2F3	11q23.3	0.300971	0.306569	0.152672	0.00561618	0.0984525
PPCDC	15q24.2	0.320388	0.138686	0.152672	0.000665463	0.021832
PPIB	15q22.31	0.330097	0.131387	0.114504	1.9739e-05	0.00212967
PPIP5K1	15q15.3	0.349515	0.175182	0.122137	5.90035e-05	0.00418645
PPP1R14D	15q15.1	0.320388	0.160584	0.145038	0.00138811	0.0378314
PRC1	15q26.1	0.31068	0.131387	0.160305	0.00118461	0.0332374
PRC1-AS1	15q26.1	0.31068	0.131387	0.160305	0.00118461	0.0332374
PRKXP1	15q26.3	0.320388	0.175182	0.152672	0.00361539	0.0778651
PRTG	15q21.3	0.31068	0.131387	0.0916031	1.77776e-05	0.00205563
PSMA4	15q25.1	0.330097	0.138686	0.137405	0.000141113	0.00720398
PSMB6	17p13.2	0.728155	0.510949	0.549618	0.00196585	0.0496348
PSTPIP1	15q24.3	0.330097	0.131387	0.145038	0.000135584	0.00720398
PTPN9	15q24.2	0.31068	0.138686	0.145038	0.000967573	0.0297828
PTS	11q23.1	0.300971	0.306569	0.152672	0.00561618	0.0984525
PWAR1	15q11.2	0.339806	0.175182	0.0992366	1.81688e-05	0.00205563
PWAR4	15q11.2	0.339806	0.175182	0.0992366	1.81688e-05	0.00205563
PWAR5	15q11.2	0.339806	0.175182	0.0992366	1.81688e-05	0.00205563
PWARSN	15q11.2	0.339806	0.175182	0.0992366	1.81688e-05	0.00205563
PWRN1	15q11.2	0.339806	0.175182	0.0992366	1.81688e-05	0.00205563
PWRN2	15q11.2	0.339806	0.189781	0.114504	0.0001077	0.006386
PWRN3	15q11.2	0.514563	0.437956	0.305344	0.00408394	0.0841187
PWRN4	15q11.2	0.339806	0.175182	0.0992366	1.81688e-05	0.00205563
PYGO1	15q21.3	0.31068	0.131387	0.0916031	1.77776e-05	0.00205563
RAB11A	15q22.31	0.320388	0.131387	0.10687	2.64908e-05	0.00252036
RAB27A	15q21.3	0.31068	0.131387	0.0992366	3.42859e-05	0.00300267
RAB8B	15q22.2	0.339806	0.138686	0.114504	1.27289e-05	0.00205563
RABEP1	17p13.2	0.728155	0.518248	0.557252	0.00298833	0.0696534
RAD51	15q15.1	0.320388	0.160584	0.145038	0.00138811	0.0378314
RAD51-AS1	15q15.1	0.320388	0.160584	0.145038	0.00138811	0.0378314
RAP1GAP2	17p13.3	0.718447	0.510949	0.557252	0.00395731	0.0819544
RASGRF1	15q25.1	0.330097	0.131387	0.137405	8.94385e-05	0.00550599
RASGRP1	15q14	0.31068	0.145985	0.122137	0.000387351	0.0145811
RASL12	15q22.31	0.31068	0.138686	0.10687	9.23754e-05	0.00558818
RBM7	11q23.2	0.300971	0.306569	0.152672	0.00561618	0.0984525
RBPMS2	15q22.31	0.330097	0.138686	0.10687	1.67442e-05	0.00205563
RCCD1	15q26.1	0.31068	0.131387	0.160305	0.00118461	0.0332374
RCN2	15q24.3	0.330097	0.131387	0.145038	0.000135584	0.00720398
RCVRN	17p13.1	0.737864	0.525547	0.587786	0.00334366	0.075254
REC114	15q24.1	0.320388	0.131387	0.137405	0.000200479	0.00920224
REXO2	11q23.2	0.300971	0.306569	0.152672	0.00561618	0.0984525
RFX7	15q21.3	0.31068	0.131387	0.0992366	3.42859e-05	0.00300267
RHCG	15q26.1	0.31068	0.131387	0.160305	0.00118461	0.0332374
RHOV	15q15.1	0.320388	0.160584	0.145038	0.00138811	0.0378314
RLBP1	15q26.1	0.31068	0.131387	0.167939	0.00152751	0.0405441
RMDN3	15q15.1	0.320388	0.160584	0.145038	0.00138811	0.0378314
RNASEK	17p13.1	0.728155	0.518248	0.587786	0.00418363	0.0841187
RNASEK-C17orf49	17p13.1	0.728155	0.518248	0.587786	0.00418363	0.0841187
RNF111	15q22.1	0.320388	0.124088	0.0992366	9.04859e-06	0.00205563
RNF167	17p13.2	0.728155	0.510949	0.549618	0.00196585	0.0496348
RNU5A-1	15q22.31	0.320388	0.138686	0.10687	3.98969e-05	0.00317521
RNU5B-1	15q22.31	0.320388	0.138686	0.10687	3.98969e-05	0.00317521
RNU6-1|chr15	15q23	0.320388	0.138686	0.122137	0.000121792	0.00700719
RNU6-2|chr15	15q23	0.320388	0.138686	0.122137	0.000121792	0.00700719
RNU6-7|chr15	15q23	0.320388	0.138686	0.122137	0.000121792	0.00700719
RORA	15q22.2	0.330097	0.138686	0.0992366	8.73253e-06	0.00205563
RORA-AS1	15q22.2	0.320388	0.138686	0.0992366	2.12312e-05	0.00225579
RORA-AS2	15q22.2	0.320388	0.131387	0.0992366	1.41683e-05	0.00205563
RPAIN	17p13.2	0.728155	0.518248	0.557252	0.00298833	0.0696534
RPAP1	15q15.1	0.330097	0.167883	0.129771	0.000361878	0.0138727
RPL29P2	17p13.1	0.737864	0.532847	0.603053	0.00512823	0.096204
RPL4	15q22.31	0.320388	0.131387	0.10687	2.64908e-05	0.00252036
RPLP1	15q23	0.339806	0.124088	0.114504	4.86615e-06	0.00205563
RPP25	15q24.2	0.320388	0.138686	0.152672	0.000665463	0.021832
RPS17	15q25.2	0.320388	0.131387	0.137405	0.000200479	0.00920224
RPS27L	15q22.2	0.339806	0.138686	0.114504	1.27289e-05	0.00205563
RPUSD2	15q15.1	0.320388	0.145985	0.145038	0.000693786	0.0226194
RSL24D1	15q21.3	0.31068	0.131387	0.0992366	3.42859e-05	0.00300267
RTF1	15q15.1	0.320388	0.167883	0.137405	0.00120181	0.0335848
RYR3	15q13.3	0.31068	0.160584	0.122137	0.000706485	0.0226454
SALRNA2	15q23	0.330097	0.145985	0.114504	4.54291e-05	0.00353486
SALRNA3	15q23	0.330097	0.145985	0.114504	4.54291e-05	0.00353486
SAT2	17p13.1	0.737864	0.532847	0.610687	0.00525431	0.096204
SAXO2	15q25.2	0.320388	0.131387	0.137405	0.000200479	0.00920224
SCAMP2	15q24.1	0.320388	0.138686	0.152672	0.000665463	0.021832
SCAMP5	15q24.2	0.320388	0.138686	0.152672	0.000665463	0.021832
SCAND2P	15q25.2	0.31068	0.145985	0.129771	0.000623384	0.0209776
SCARNA14	15q22.31	0.320388	0.124088	0.10687	1.68429e-05	0.00205563
SCARNA15	15q25.2	0.320388	0.138686	0.137405	0.000309849	0.0123633
SCARNA21	17p13.1	0.737864	0.532847	0.603053	0.00512823	0.096204
SCG3	15q21.2	0.320388	0.145985	0.10687	5.76322e-05	0.00410306
SCG5	15q13.3	0.31068	0.160584	0.122137	0.000706485	0.0226454
SCIMP	17p13.2	0.718447	0.518248	0.557252	0.0052627	0.096204
SDHD	11q23.1	0.300971	0.306569	0.152672	0.00561618	0.0984525
SEC11A	15q25.2	0.31068	0.153285	0.129771	0.000864959	0.0272657
SECISBP2L	15q21.1	0.320388	0.153285	0.114504	0.000144907	0.00732621
SEMA4B	15q26.1	0.320388	0.131387	0.160305	0.000580174	0.0198101
SEMA6D	15q21.1	0.330097	0.167883	0.114504	0.000118083	0.00694268
SEMA7A	15q24.1	0.330097	0.138686	0.152672	0.000315783	0.0124009
SENP3	17p13.1	0.737864	0.525547	0.603053	0.00364941	0.0778651
SENP3-EIF4A1	17p13.1	0.737864	0.532847	0.603053	0.00512823	0.096204
SENP8	15q23	0.330097	0.131387	0.122137	3.41813e-05	0.00300267
SERF2	15q15.3	0.339806	0.160584	0.114504	3.9642e-05	0.00317521
SERF2-C15ORF63	15q15.3	0.339806	0.160584	0.114504	3.9642e-05	0.00317521
SERINC4	15q15.3	0.339806	0.160584	0.114504	3.9642e-05	0.00317521
SERPINF1	17p13.3	0.699029	0.50365	0.526718	0.00548451	0.0984525
SERPINF2	17p13.3	0.699029	0.50365	0.526718	0.00548451	0.0984525
SGSM2	17p13.3	0.718447	0.50365	0.534351	0.00202456	0.0503878
SH2D7	15q25.1	0.330097	0.131387	0.129771	5.653e-05	0.00409422
SH3GL3	15q25.2	0.320388	0.138686	0.129771	0.000198569	0.00920224
SHBG	17p13.1	0.737864	0.532847	0.610687	0.00525431	0.096204
SHC4	15q21.1	0.320388	0.153285	0.114504	0.000144907	0.00732621
SHF	15q21.1	0.31068	0.160584	0.114504	0.0004131	0.0145811
SHPK	17p13.2	0.718447	0.510949	0.541985	0.00309005	0.0706089
SIK3	11q23.3	0.31068	0.321168	0.160305	0.00460017	0.089987
SIN3A	15q24.2	0.31068	0.138686	0.145038	0.000967573	0.0297828
SKOR1	15q23	0.320388	0.138686	0.122137	0.000121792	0.00700719
SLC12A1	15q21.1	0.320388	0.160584	0.122137	0.000339548	0.0131857
SLC12A6	15q14	0.31068	0.160584	0.114504	0.0004131	0.0145811
SLC13A5	17p13.1	0.728155	0.518248	0.580153	0.00396636	0.0819544
SLC16A11	17p13.1	0.728155	0.518248	0.587786	0.00418363	0.0841187
SLC16A13	17p13.1	0.728155	0.518248	0.587786	0.00418363	0.0841187
SLC24A1	15q22.31	0.330097	0.131387	0.10687	1.08671e-05	0.00205563
SLC24A5	15q21.1	0.320388	0.160584	0.122137	0.000339548	0.0131857
SLC25A11	17p13.2	0.728155	0.510949	0.549618	0.00196585	0.0496348
SLC27A2	15q21.2	0.320388	0.145985	0.114504	0.00010374	0.00618626
SLC28A1	15q25.3	0.320388	0.153285	0.137405	0.000657451	0.021832
SLC28A2	15q21.1	0.31068	0.160584	0.114504	0.0004131	0.0145811
SLC2A4	17p13.1	0.728155	0.518248	0.59542	0.00432226	0.0859468
SLC30A4	15q21.1	0.31068	0.160584	0.114504	0.0004131	0.0145811
SLC35G6	17p13.1	0.737864	0.518248	0.603053	0.00255081	0.0611798
SLC51B	15q22.31	0.320388	0.138686	0.10687	3.98969e-05	0.00317521
SLC52A1	17p13.2	0.718447	0.510949	0.549618	0.00353237	0.0778651
SLTM	15q22.1	0.320388	0.124088	0.0992366	9.04859e-06	0.00205563
SMAD3	15q22.33	0.339806	0.167883	0.122137	9.77514e-05	0.00589635
SMAD6	15q22.31	0.31068	0.138686	0.10687	9.23754e-05	0.00558818
SMG6	17p13.3	0.718447	0.50365	0.534351	0.00202456	0.0503878
SMTNL2	17p13.2	0.728155	0.510949	0.557252	0.0022242	0.0547703
SNAP23	15q15.1	0.330097	0.160584	0.129771	0.000269172	0.0113819
SNAPC5	15q22.31	0.320388	0.124088	0.10687	1.68429e-05	0.00205563
SNHG21	15q25.2	0.320388	0.138686	0.137405	0.000309849	0.0123633
SNORA48	17p13.1	0.737864	0.525547	0.603053	0.00364941	0.0778651
SNORA67	17p13.1	0.737864	0.532847	0.603053	0.00512823	0.096204
SNORD10	17p13.1	0.737864	0.525547	0.603053	0.00364941	0.0778651
SNORD107	15q11.2	0.339806	0.175182	0.0992366	1.81688e-05	0.00205563
SNORD108	15q11.2	0.339806	0.175182	0.0992366	1.81688e-05	0.00205563
SNORD109A	15q11.2	0.339806	0.175182	0.0992366	1.81688e-05	0.00205563
SNORD115-1	15q11.2	0.339806	0.175182	0.0992366	1.81688e-05	0.00205563
SNORD115-10	15q11.2	0.339806	0.175182	0.0992366	1.81688e-05	0.00205563
SNORD115-11	15q11.2	0.339806	0.175182	0.0992366	1.81688e-05	0.00205563
SNORD115-12	15q11.2	0.339806	0.175182	0.0992366	1.81688e-05	0.00205563
SNORD115-13	15q11.2	0.339806	0.175182	0.0992366	1.81688e-05	0.00205563
SNORD115-14	15q11.2	0.339806	0.175182	0.0992366	1.81688e-05	0.00205563
SNORD115-15	15q11.2	0.339806	0.175182	0.0992366	1.81688e-05	0.00205563
SNORD115-16	15q11.2	0.339806	0.175182	0.0992366	1.81688e-05	0.00205563
SNORD115-17	15q11.2	0.339806	0.175182	0.0992366	1.81688e-05	0.00205563
SNORD115-18	15q11.2	0.339806	0.175182	0.0992366	1.81688e-05	0.00205563
SNORD115-2	15q11.2	0.339806	0.175182	0.0992366	1.81688e-05	0.00205563
SNORD115-20	15q11.2	0.339806	0.175182	0.0992366	1.81688e-05	0.00205563
SNORD115-21	15q11.2	0.339806	0.175182	0.0992366	1.81688e-05	0.00205563
SNORD115-22	15q11.2	0.339806	0.175182	0.0992366	1.81688e-05	0.00205563
SNORD115-23	15q11.2	0.339806	0.175182	0.0992366	1.81688e-05	0.00205563
SNORD115-24	15q11.2	0.339806	0.175182	0.0992366	1.81688e-05	0.00205563
SNORD115-25	15q11.2	0.339806	0.175182	0.0992366	1.81688e-05	0.00205563
SNORD115-26	15q11.2	0.339806	0.175182	0.0992366	1.81688e-05	0.00205563
SNORD115-27	15q11.2	0.339806	0.175182	0.0992366	1.81688e-05	0.00205563
SNORD115-28	15q11.2	0.339806	0.175182	0.0992366	1.81688e-05	0.00205563
SNORD115-29	15q11.2	0.339806	0.175182	0.0992366	1.81688e-05	0.00205563
SNORD115-3	15q11.2	0.339806	0.175182	0.0992366	1.81688e-05	0.00205563
SNORD115-30	15q11.2	0.339806	0.175182	0.0992366	1.81688e-05	0.00205563
SNORD115-31	15q11.2	0.339806	0.175182	0.0992366	1.81688e-05	0.00205563
SNORD115-32	15q11.2	0.339806	0.175182	0.0992366	1.81688e-05	0.00205563
SNORD115-33	15q11.2	0.339806	0.175182	0.0992366	1.81688e-05	0.00205563
SNORD115-34	15q11.2	0.339806	0.175182	0.0992366	1.81688e-05	0.00205563
SNORD115-35	15q11.2	0.339806	0.175182	0.0992366	1.81688e-05	0.00205563
SNORD115-36	15q11.2	0.339806	0.175182	0.0992366	1.81688e-05	0.00205563
SNORD115-37	15q11.2	0.339806	0.175182	0.0992366	1.81688e-05	0.00205563
SNORD115-38	15q11.2	0.339806	0.175182	0.0992366	1.81688e-05	0.00205563
SNORD115-39	15q11.2	0.339806	0.175182	0.0992366	1.81688e-05	0.00205563
SNORD115-4	15q11.2	0.339806	0.175182	0.0992366	1.81688e-05	0.00205563
SNORD115-41	15q11.2	0.339806	0.175182	0.0992366	1.81688e-05	0.00205563
SNORD115-44	15q11.2	0.339806	0.175182	0.0992366	1.81688e-05	0.00205563
SNORD115-45	15q11.2	0.339806	0.175182	0.0992366	1.81688e-05	0.00205563
SNORD115-46	15q11.2	0.339806	0.175182	0.0992366	1.81688e-05	0.00205563
SNORD115-47	15q11.2	0.339806	0.175182	0.0992366	1.81688e-05	0.00205563
SNORD115-48	15q11.2	0.339806	0.175182	0.0992366	1.81688e-05	0.00205563
SNORD115-5	15q11.2	0.339806	0.175182	0.0992366	1.81688e-05	0.00205563
SNORD115-6	15q11.2	0.339806	0.175182	0.0992366	1.81688e-05	0.00205563
SNORD115-7	15q11.2	0.339806	0.175182	0.0992366	1.81688e-05	0.00205563
SNORD115-8	15q11.2	0.339806	0.175182	0.0992366	1.81688e-05	0.00205563
SNORD116-1	15q11.2	0.339806	0.175182	0.0992366	1.81688e-05	0.00205563
SNORD116-10	15q11.2	0.339806	0.175182	0.0992366	1.81688e-05	0.00205563
SNORD116-11	15q11.2	0.339806	0.175182	0.0992366	1.81688e-05	0.00205563
SNORD116-12	15q11.2	0.339806	0.175182	0.0992366	1.81688e-05	0.00205563
SNORD116-13	15q11.2	0.339806	0.175182	0.0992366	1.81688e-05	0.00205563
SNORD116-14	15q11.2	0.339806	0.175182	0.0992366	1.81688e-05	0.00205563
SNORD116-15	15q11.2	0.339806	0.175182	0.0992366	1.81688e-05	0.00205563
SNORD116-16	15q11.2	0.339806	0.175182	0.0992366	1.81688e-05	0.00205563
SNORD116-17	15q11.2	0.339806	0.175182	0.0992366	1.81688e-05	0.00205563
SNORD116-18	15q11.2	0.339806	0.175182	0.0992366	1.81688e-05	0.00205563
SNORD116-2	15q11.2	0.339806	0.175182	0.0992366	1.81688e-05	0.00205563
SNORD116-20	15q11.2	0.339806	0.175182	0.0992366	1.81688e-05	0.00205563
SNORD116-21	15q11.2	0.339806	0.175182	0.0992366	1.81688e-05	0.00205563
SNORD116-22	15q11.2	0.339806	0.175182	0.0992366	1.81688e-05	0.00205563
SNORD116-23	15q11.2	0.339806	0.175182	0.0992366	1.81688e-05	0.00205563
SNORD116-24	15q11.2	0.339806	0.175182	0.0992366	1.81688e-05	0.00205563
SNORD116-25	15q11.2	0.339806	0.175182	0.0992366	1.81688e-05	0.00205563
SNORD116-26	15q11.2	0.339806	0.175182	0.0992366	1.81688e-05	0.00205563
SNORD116-27	15q11.2	0.339806	0.175182	0.0992366	1.81688e-05	0.00205563
SNORD116-28	15q11.2	0.339806	0.175182	0.0992366	1.81688e-05	0.00205563
SNORD116-29	15q11.2	0.339806	0.175182	0.0992366	1.81688e-05	0.00205563
SNORD116-3	15q11.2	0.339806	0.175182	0.0992366	1.81688e-05	0.00205563
SNORD116-30	15q11.2	0.339806	0.175182	0.0992366	1.81688e-05	0.00205563
SNORD116-4	15q11.2	0.339806	0.175182	0.0992366	1.81688e-05	0.00205563
SNORD116-5	15q11.2	0.339806	0.175182	0.0992366	1.81688e-05	0.00205563
SNORD116-8	15q11.2	0.339806	0.175182	0.0992366	1.81688e-05	0.00205563
SNORD16	15q22.31	0.320388	0.131387	0.10687	2.64908e-05	0.00252036
SNORD18A	15q22.31	0.320388	0.131387	0.10687	2.64908e-05	0.00252036
SNORD18B	15q22.31	0.320388	0.131387	0.10687	2.64908e-05	0.00252036
SNORD18C	15q22.31	0.320388	0.124088	0.10687	1.68429e-05	0.00205563
SNORD64	15q11.2	0.339806	0.175182	0.0992366	1.81688e-05	0.00205563
SNORD91A	17p13.3	0.718447	0.50365	0.534351	0.00202456	0.0503878
SNORD91B	17p13.3	0.718447	0.50365	0.534351	0.00202456	0.0503878
SNRPA1	15q26.3	0.320388	0.189781	0.152672	0.00559175	0.0984525
SNRPN	15q11.2	0.339806	0.175182	0.0992366	1.81688e-05	0.00205563
SNUPN	15q24.2	0.31068	0.131387	0.145038	0.000634028	0.0212333
SNURF	15q11.2	0.339806	0.175182	0.0992366	1.81688e-05	0.00205563
SNX1	15q22.31	0.330097	0.131387	0.114504	1.9739e-05	0.00212967
SNX22	15q22.31	0.330097	0.131387	0.114504	1.9739e-05	0.00212967
SNX33	15q24.2	0.31068	0.131387	0.145038	0.000634028	0.0212333
SORD	15q21.1	0.31068	0.167883	0.129771	0.00148988	0.0399293
SOX15	17p13.1	0.737864	0.532847	0.603053	0.00512823	0.096204
SPAG7	17p13.2	0.728155	0.510949	0.549618	0.00196585	0.0496348
SPATA19	11q25	0.291262	0.328467	0.160305	0.0048478	0.0946543
SPATA22	17p13.2	0.718447	0.510949	0.541985	0.00309005	0.0706089
SPATA5L1	15q21.1	0.300971	0.160584	0.114504	0.000849611	0.0269442
SPATA8	15q26.2	0.31068	0.167883	0.152672	0.00522746	0.096204
SPATA8-AS1	15q26.2	0.31068	0.167883	0.152672	0.00522746	0.096204
SPDYE4	17p13.1	0.737864	0.532847	0.59542	0.00490122	0.0953414
SPEM1	17p13.1	0.737864	0.518248	0.610687	0.00255172	0.0611798
SPESP1	15q23	0.339806	0.138686	0.122137	2.26192e-05	0.00228716
SPG11	15q21.1	0.320388	0.160584	0.0992366	5.57993e-05	0.00409422
SPG21	15q22.31	0.320388	0.138686	0.10687	3.98969e-05	0.00317521
SPINT1	15q15.1	0.320388	0.160584	0.145038	0.00138811	0.0378314
SPNS2	17p13.2	0.718447	0.510949	0.557252	0.00395731	0.0819544
SPNS3	17p13.2	0.718447	0.518248	0.557252	0.0052627	0.096204
SPPL2A	15q21.2	0.31068	0.153285	0.114504	0.000314235	0.0123633
SPRED1	15q14	0.31068	0.145985	0.122137	0.000387351	0.0145811
SPTBN5	15q15.1	0.330097	0.160584	0.129771	0.000269172	0.0113819
SQRDL	15q21.1	0.31068	0.160584	0.114504	0.0004131	0.0145811
SRP14	15q15.1	0.320388	0.153285	0.145038	0.000999646	0.0299105
SRP14-AS1	15q15.1	0.320388	0.153285	0.145038	0.000999646	0.0299105
SRR	17p13.3	0.718447	0.50365	0.534351	0.00202456	0.0503878
ST20	15q25.1	0.330097	0.131387	0.137405	8.94385e-05	0.00550599
ST20-AS1	15q25.1	0.330097	0.131387	0.137405	8.94385e-05	0.00550599
ST20-MTHFS	15q25.1	0.330097	0.131387	0.137405	8.94385e-05	0.00550599
STARD5	15q25.1	0.330097	0.138686	0.137405	0.000141113	0.00720398
STARD9	15q15.2	0.330097	0.160584	0.122137	0.00015837	0.00779964
STOML1	15q24.1	0.320388	0.131387	0.145038	0.000297579	0.0121891
STRA6	15q24.1	0.320388	0.131387	0.152672	0.000423865	0.0148608
STRC	15q15.3	0.339806	0.189781	0.152672	0.00160489	0.0424677
STX8	17p13.1	0.737864	0.525547	0.587786	0.00334366	0.075254
SV2B	15q26.1	0.31068	0.138686	0.160305	0.00183969	0.0484359
SYNM	15q26.3	0.330097	0.167883	0.152672	0.00141996	0.0381042
TAX1BP3	17p13.2	0.718447	0.510949	0.549618	0.00353237	0.0778651
TBC1D21	15q24.1	0.320388	0.131387	0.145038	0.000297579	0.0121891
TBC1D2B	15q24.3	0.330097	0.131387	0.137405	8.94385e-05	0.00550599
TCF12	15q21.3	0.320388	0.124088	0.0992366	9.04859e-06	0.00205563
TEKT1	17p13.1	0.728155	0.518248	0.587786	0.00418363	0.0841187
TERB2	15q21.1	0.31068	0.160584	0.0992366	0.000122863	0.00700719
TEX12	11q23.1	0.300971	0.306569	0.152672	0.00561618	0.0984525
TEX9	15q21.3	0.31068	0.131387	0.10687	6.2772e-05	0.00436505
TGM5	15q15.2	0.330097	0.160584	0.122137	0.00015837	0.00779964
TGM7	15q15.2	0.330097	0.160584	0.122137	0.00015837	0.00779964
THAP10	15q23	0.330097	0.131387	0.114504	1.9739e-05	0.00212967
THBS1	15q14	0.320388	0.153285	0.137405	0.000657451	0.021832
THSD4	15q23	0.330097	0.153285	0.122137	0.000114435	0.00674713
THSD4-AS1	15q23	0.330097	0.138686	0.122137	5.32384e-05	0.00396807
THSD4-AS2	15q23	0.330097	0.138686	0.122137	5.32384e-05	0.00396807
TICRR	15q26.1	0.31068	0.131387	0.160305	0.00118461	0.0332374
TIMM22	17p13.3	0.708738	0.50365	0.557252	0.00509078	0.096204
TIMM8B	11q23.1	0.300971	0.306569	0.152672	0.00561618	0.0984525
TIPIN	15q22.31	0.320388	0.124088	0.10687	1.68429e-05	0.00205563
TJP1	15q13.1	0.368932	0.175182	0.129771	2.11594e-05	0.00225579
TLCD2	17p13.3	0.699029	0.50365	0.526718	0.00548451	0.0984525
TLE3	15q23	0.330097	0.145985	0.114504	4.54291e-05	0.00353486
TLN2	15q22.2	0.330097	0.138686	0.0992366	8.73253e-06	0.00205563
TM4SF5	17p13.2	0.728155	0.510949	0.549618	0.00196585	0.0496348
TM6SF1	15q25.2	0.320388	0.131387	0.129771	0.00012941	0.00710941
TMC3	15q25.1	0.330097	0.138686	0.137405	0.000141113	0.00720398
TMC3-AS1	15q25.1	0.330097	0.138686	0.137405	0.000141113	0.00720398
TMCO5A	15q14	0.31068	0.145985	0.122137	0.000387351	0.0145811
TMCO5B	15q13.3	0.31068	0.160584	0.122137	0.000706485	0.0226454
TMED3	15q25.1	0.330097	0.131387	0.137405	8.94385e-05	0.00550599
TMEM102	17p13.1	0.737864	0.518248	0.610687	0.00255172	0.0611798
TMEM136	11q23.3	0.300971	0.306569	0.152672	0.00561618	0.0984525
TMEM202	15q23	0.330097	0.131387	0.122137	3.41813e-05	0.00300267
TMEM256	17p13.1	0.737864	0.518248	0.610687	0.00255172	0.0611798
TMEM256-PLSCR3	17p13.1	0.737864	0.518248	0.610687	0.00255172	0.0611798
TMEM266	15q24.2	0.320388	0.131387	0.145038	0.000297579	0.0121891
TMEM62	15q15.2	0.330097	0.167883	0.122137	0.000211273	0.00959253
TMEM87A	15q15.1	0.330097	0.160584	0.129771	0.000269172	0.0113819
TMEM88	17p13.1	0.737864	0.532847	0.603053	0.00512823	0.096204
TMEM95	17p13.1	0.728155	0.518248	0.610687	0.00433284	0.0859468
TMOD2	15q21.2	0.320388	0.145985	0.10687	5.76322e-05	0.00410306
TMOD3	15q21.2	0.320388	0.145985	0.10687	5.76322e-05	0.00410306
TMPRSS5	11q23.2	0.300971	0.306569	0.152672	0.00561618	0.0984525
TNFAIP8L3	15q21.2	0.31068	0.153285	0.114504	0.000314235	0.0123633
TNFSF12	17p13.1	0.737864	0.525547	0.603053	0.00364941	0.0778651
TNFSF12-TNFSF13	17p13.1	0.737864	0.525547	0.603053	0.00364941	0.0778651
TNFSF13	17p13.1	0.737864	0.525547	0.603053	0.00364941	0.0778651
TNK1	17p13.1	0.728155	0.518248	0.610687	0.00433284	0.0859468
TP53	17p13.1	0.737864	0.532847	0.603053	0.00512823	0.096204
TP53BP1	15q15.3	0.339806	0.167883	0.114504	5.36507e-05	0.00396807
TPM1	15q22.2	0.339806	0.138686	0.114504	1.27289e-05	0.00205563
TRAPPC1	17p13.1	0.737864	0.532847	0.603053	0.00512823	0.096204
TRIM69	15q21.1	0.31068	0.160584	0.0992366	0.000122863	0.00700719
TRIP4	15q22.31	0.339806	0.131387	0.10687	4.33656e-06	0.00205563
TRPM1	15q13.3	0.31068	0.160584	0.114504	0.0004131	0.0145811
TRPM7	15q21.2	0.31068	0.153285	0.114504	0.000314235	0.0123633
TRPV1	17p13.2	0.718447	0.510949	0.541985	0.00309005	0.0706089
TRPV3	17p13.2	0.718447	0.510949	0.541985	0.00309005	0.0706089
TSPAN3	15q24.3	0.330097	0.131387	0.145038	0.000135584	0.00720398
TSR1	17p13.3	0.718447	0.50365	0.534351	0.00202456	0.0503878
TTBK2	15q15.2	0.330097	0.160584	0.122137	0.00015837	0.00779964
TTC23	15q26.3	0.330097	0.167883	0.152672	0.00141996	0.0381042
TTLL13P	15q26.1	0.320388	0.131387	0.160305	0.000580174	0.0198101
TUBGCP4	15q15.3	0.330097	0.160584	0.122137	0.00015837	0.00779964
TUBGCP5	15q11.2	0.300971	0.182482	0.122137	0.00250736	0.0608128
TXNDC17	17p13.1	0.728155	0.518248	0.580153	0.00396636	0.0819544
TYRO3	15q15.1	0.330097	0.167883	0.129771	0.000361878	0.0138727
TYRO3P	15q24.2	0.320388	0.131387	0.145038	0.000297579	0.0121891
UACA	15q23	0.330097	0.145985	0.114504	4.54291e-05	0.00353486
UBAP1L	15q22.31	0.31068	0.138686	0.10687	9.23754e-05	0.00558818
UBE2G1	17p13.2	0.718447	0.510949	0.557252	0.00395731	0.0819544
UBE2Q2	15q24.2	0.31068	0.124088	0.145038	0.000398762	0.0145811
UBE2Q2L	15q25.2	0.300971	0.145985	0.137405	0.00194466	0.0496348
UBE2Q2P1	15q25.2	0.31068	0.145985	0.129771	0.000623384	0.0209776
UBE2Q2P2	15q25.2	0.320388	0.131387	0.137405	0.000200479	0.00920224
UBE3A	15q11.2	0.339806	0.175182	0.0992366	1.81688e-05	0.00205563
UBL7	15q24.1	0.320388	0.138686	0.160305	0.000918544	0.0288246
UBL7-AS1	15q24.1	0.320388	0.138686	0.160305	0.000918544	0.0288246
UBR1	15q15.2	0.330097	0.160584	0.122137	0.00015837	0.00779964
ULK3	15q24.1	0.320388	0.138686	0.152672	0.000665463	0.021832
ULK4P3	15q13.2	0.330097	0.189781	0.129771	0.000715053	0.022885
UNC13C	15q21.3	0.320388	0.138686	0.0916031	1.07347e-05	0.00205563
UNC45A	15q26.1	0.31068	0.131387	0.160305	0.00118461	0.0332374
USP28	11q23.2	0.300971	0.306569	0.152672	0.00561618	0.0984525
USP3	15q22.31	0.339806	0.131387	0.10687	4.33656e-06	0.00205563
USP3-AS1	15q22.31	0.339806	0.131387	0.10687	4.33656e-06	0.00205563
USP43	17p13.1	0.737864	0.525547	0.587786	0.00334366	0.075254
USP50	15q21.2	0.31068	0.153285	0.114504	0.000314235	0.0123633
USP6	17p13.2	0.718447	0.518248	0.557252	0.0052627	0.096204
USP8	15q21.2	0.31068	0.153285	0.114504	0.000314235	0.0123633
VIMP	15q26.3	0.320388	0.189781	0.152672	0.00559175	0.0984525
VMO1	17p13.2	0.728155	0.510949	0.549618	0.00196585	0.0496348
VPS13C	15q22.2	0.320388	0.124088	0.0992366	9.04859e-06	0.00205563
VPS18	15q15.1	0.320388	0.160584	0.145038	0.00138811	0.0378314
VPS33B	15q26.1	0.31068	0.131387	0.160305	0.00118461	0.0332374
VPS39	15q15.1	0.330097	0.160584	0.129771	0.000269172	0.0113819
VWA8	13q14.11	0.553398	0.467153	0.343511	0.00495272	0.096204
VWA8-AS1	13q14.11	0.553398	0.474453	0.343511	0.00455812	0.0897516
VWA9	15q22.31	0.330097	0.131387	0.10687	1.08671e-05	0.00205563
WASH3P	15q26.3	0.339806	0.189781	0.167939	0.00361014	0.0778651
WDR61	15q25.1	0.330097	0.131387	0.137405	8.94385e-05	0.00550599
WDR72	15q21.3	0.320388	0.145985	0.0992366	3.04992e-05	0.00286931
WDR73	15q25.2	0.31068	0.153285	0.129771	0.000864959	0.0272657
WDR76	15q15.3	0.339806	0.160584	0.114504	3.9642e-05	0.00317521
WDR81	17p13.3	0.699029	0.50365	0.526718	0.00548451	0.0984525
WDR93	15q26.1	0.31068	0.131387	0.160305	0.00118461	0.0332374
WHAMM	15q25.2	0.320388	0.138686	0.137405	0.000309849	0.0123633
WHAMMP1	15q13.3	0.31068	0.182482	0.137405	0.00359712	0.0778651
WHAMMP2	15q13.1	0.320388	0.175182	0.122137	0.000558748	0.0193308
WHAMMP3	15q11.2	0.300971	0.189781	0.122137	0.00282978	0.0670783
WRAP53	17p13.1	0.737864	0.532847	0.603053	0.00512823	0.096204
WSCD1	17p13.2	0.728155	0.518248	0.580153	0.00396636	0.0819544
XAF1	17p13.1	0.728155	0.518248	0.580153	0.00396636	0.0819544
YBX2	17p13.1	0.728155	0.518248	0.610687	0.00433284	0.0859468
YWHAE	17p13.3	0.699029	0.50365	0.526718	0.00548451	0.0984525
ZBTB16	11q23.2	0.300971	0.306569	0.152672	0.00561618	0.0984525
ZBTB4	17p13.1	0.737864	0.518248	0.610687	0.00255172	0.0611798
ZFAND6	15q25.1	0.330097	0.131387	0.137405	8.94385e-05	0.00550599
ZFP3	17p13.2	0.718447	0.518248	0.557252	0.0052627	0.096204
ZFYVE19	15q15.1	0.320388	0.160584	0.145038	0.00138811	0.0378314
ZMYND15	17p13.2	0.728155	0.510949	0.549618	0.00196585	0.0496348
ZNF106	15q15.1	0.330097	0.160584	0.129771	0.000269172	0.0113819
ZNF232	17p13.2	0.718447	0.518248	0.557252	0.0052627	0.096204
ZNF280D	15q21.3	0.320388	0.124088	0.10687	1.68429e-05	0.00205563
ZNF592	15q25.3	0.31068	0.153285	0.129771	0.000864959	0.0272657
ZNF594	17p13.2	0.718447	0.518248	0.557252	0.0052627	0.096204
ZNF609	15q22.31	0.339806	0.145985	0.10687	1.03276e-05	0.00205563
ZNF710	15q26.1	0.320388	0.131387	0.160305	0.000580174	0.0198101
ZNF770	15q14	0.31068	0.160584	0.114504	0.0004131	0.0145811
ZNF774	15q26.1	0.300971	0.131387	0.160305	0.00234507	0.0572751
ZPR1	11q23.3	0.300971	0.321168	0.152672	0.00319891	0.0727786
ZSCAN2	15q25.2	0.31068	0.145985	0.129771	0.000623384	0.0209776
ZSCAN29	15q15.3	0.330097	0.160584	0.122137	0.00015837	0.00779964
ZW10	11q23.2	0.300971	0.306569	0.152672	0.00561618	0.0984525
ZWILCH	15q22.31	0.31068	0.131387	0.10687	6.2772e-05	0.00436505
ZZEF1	17p13.2	0.718447	0.510949	0.564885	0.00434436	0.0859468

## Sheet: Table S5
Table S5. The list of 74 immunomodulators
Symbol	Categary
ADORA2A	Inhibitory
ARG1	Inhibitory
BTLA	Inhibitory
BTN3A1	Stimulatory
BTN3A2	Stimulatory
CCL5	Stimulatory
CD27	Stimulatory
CD274	Inhibitory
CD276	Inhibitory
CD28	Stimulatory
CD40	Stimulatory
CD40LG	Stimulatory
CD70	Stimulatory
CD80	Stimulatory
CTLA4	Inhibitory
CX3CL1	Stimulatory
CXCL10	Stimulatory
CXCL9	Stimulatory
EDNRB	Inhibitory
ENTPD1	Stimulatory
GZMA	Stimulatory
HAVCR2	Inhibitory
HLA-A	Antigen presentation
HLA-B	Antigen presentation
HLA-C	Antigen presentation
HLA-DPA1	Antigen presentation
HLA-DPB1	Antigen presentation
HLA-DQA1	Antigen presentation
HLA-DQA2	Antigen presentation
HLA-DQB1	Antigen presentation
HLA-DQB2	Antigen presentation
HLA-DRA	Antigen presentation
HLA-DRB1	Antigen presentation
HLA-DRB5	Antigen presentation
HMGB1	Stimulatory
ICAM1	Stimulatory
ICOS	Stimulatory
ICOSLG	Stimulatory
IDO1	Inhibitory
IFNA1	Stimulatory
IFNA2	Stimulatory
IFNG	Stimulatory
IL10	Inhibitory
IL12A	Stimulatory
IL13	Inhibitory
IL1A	Stimulatory
IL1B	Stimulatory
IL2	Stimulatory
IL2RA	Stimulatory
IL4	Inhibitory
ITGB2	Stimulatory
KIR2DL1	Inhibitory
KIR2DL3	Inhibitory
LAG3	Inhibitory
MICA	Antigen presentation
MICB	Antigen presentation
PDCD1	Inhibitory
PDCD1LG2	Inhibitory
PRF1	Stimulatory
SELP	Stimulatory
SLAMF7	Inhibitory
TGFB1	Inhibitory
TIGIT	Inhibitory
TLR4	Stimulatory
TNF	Stimulatory
TNFRSF14	Stimulatory
TNFRSF18	Stimulatory
TNFRSF4	Stimulatory
TNFRSF9	Stimulatory
TNFSF4	Stimulatory
TNFSF9	Stimulatory
VEGFA	Inhibitory
VEGFB	Inhibitory
VTCN1	Inhibitory
VSIR	Inhibitory
SIGLEC15	Inhibitory

## Sheet: Table S6
Table S6. The correlation between miRNA and its target significant immunomodulators in HCC
mRNA	miRNA	correlation.cluster1	correlation.cluster2	correlation.cluster3
hsa-miR-182-5p	EDNRB	-0.191587	-0.191007	-0.125459
hsa-miR-543	IL1A	0.303499	-0.162083	-0.0990068
hsa-miR-455-3p	CD80	-0.130468	-0.29879	-0.0988457
hsa-miR-372-3p	EDNRB	-0.148294	-0.0200112	-0.141861
hsa-miR-122-5p	CD40LG	0.102992	0.0778586	-0.0205098
hsa-miR-520c-3p	EDNRB	0.0431579	0.108439	-0.261951
hsa-miR-136-5p	SLAMF7	0.200044	0.0571937	0.245223
hsa-miR-181d-5p	CXCL9	-0.12738	-0.0137373	0.127988
hsa-miR-181b-5p	CXCL9	0.0222762	0.150543	0.0797748
hsa-miR-181a-5p	CXCL9	0.200796	0.192818	0.134725
hsa-miR-31-5p	HLA-A	0.19552	0.233597	0.0852505
hsa-miR-181c-5p	CXCL9	0.00246461	0.00119457	0.147255
hsa-miR-373-3p	EDNRB	-0.232288	-0.034984	-0.215524
hsa-miR-379-3p	IL10	0.12316	-0.093102	0.0317221
hsa-miR-411-3p	IL10	0.108685	0.00340664	0.0664912
hsa-miR-24-3p	IFNG	-0.236242	0.0279574	-0.143722
hsa-miR-125a-5p	VTCN1	0.444141	0.372674	0.395671
hsa-miR-125b-5p	VTCN1	-0.0069753	-0.0286039	-0.0982682
hsa-miR-505-5p	SLAMF7	0.00948502	-0.185618	-0.0261595
hsa-miR-181a-5p	IL1A	0.098346	-0.105321	-0.140169
hsa-miR-374a-5p	PDCD1	-0.241195	-0.242177	-0.107005
hsa-miR-181c-5p	IL1A	-0.0380404	-0.164174	-0.123933
hsa-miR-181b-5p	IL1A	0.130577	-0.122112	-0.195929
hsa-miR-181d-5p	IL1A	-0.0540397	-0.203152	-0.115708
hsa-miR-493-5p	IL1A	0.192829	-0.177413	-0.188741
hsa-miR-338-5p	ITGB2	-0.174019	0.0637808	0.0365142
hsa-miR-29c-3p	CD276	-0.508502	-0.392712	-0.439596
hsa-miR-29b-3p	CD276	-0.332713	-0.360237	-0.426763
hsa-miR-146b-5p	CD80	0.210661	0.0882172	-0.062922
hsa-miR-31-5p	TNFRSF9	0.0455531	0.183679	-0.00939123
hsa-miR-92a-1-5p	CXCL9	0.0915376	-0.0392383	-0.0862662
hsa-miR-369-3p	IFNG	-0.0826471	-0.101333	0.0757168
hsa-miR-29a-3p	CD276	-0.271198	-0.142681	-0.376406
hsa-miR-146a-5p	CD80	0.597649	0.561983	0.209503
hsa-miR-374b-5p	PDCD1	-0.232473	-0.194469	-0.224797
hsa-miR-185-5p	CXCL9	-0.0715159	0.102911	-0.209737
hsa-miR-484	TNFSF9	-0.0316173	0.149235	0.134692
hsa-miR-338-5p	TLR4	-0.193433	-0.105348	-0.164796
hsa-miR-1270	CD276	0.195038	0.0868285	0.0821832
hsa-miR-105-5p	CD40LG	0.02909	-0.0576795	-0.225904
hsa-miR-29b-3p	ICOS	0.0882571	0.109999	-0.0335726
hsa-miR-29c-3p	ICOS	0.0643311	0.055766	-0.00684386
hsa-miR-22-3p	CD80	-0.0254202	-0.149388	-0.0741905
hsa-miR-486-5p	VTCN1	-0.0534447	-0.272726	-0.240407
hsa-miR-29a-3p	ICOS	0.0385791	0.101728	-0.126744
hsa-miR-582-5p	CD40LG	0.0137983	0.0178087	0.212097
hsa-miR-496	CTLA4	0.122321	-0.0418339	0.0601606
hsa-miR-150-5p	TNF	0.529298	0.439464	0.477516
hsa-let-7g-5p	TNFSF9	-0.174214	0.0239681	-0.0712728
hsa-let-7c-5p	TNFSF9	-0.26778	-0.204677	-0.14756
hsa-let-7b-5p	TNFSF9	-0.036501	0.0771601	0.0220759
hsa-miR-181a-5p	TNF	0.243886	0.22318	0.27079
hsa-let-7f-5p	TNFSF9	-0.109385	0.164916	0.0312697
hsa-miR-98-5p	TNFSF9	-0.154347	0.180776	0.00212746
hsa-let-7e-5p	TNFSF9	-0.0246287	0.238464	0.120421
hsa-miR-181c-5p	TNF	0.0370599	-0.00855541	0.255432
hsa-miR-129-5p	TNFRSF9	-0.25976	0.097463	0.0509939
hsa-miR-181d-5p	TNF	-0.0895522	-0.0405566	0.122891
hsa-miR-656-3p	EDNRB	-0.145995	0.0817992	0.102532
hsa-miR-542-3p	CTLA4	-0.191111	-0.0502616	0.0692193
hsa-miR-181b-5p	TNF	0.116786	0.186946	0.322404
hsa-let-7a-5p	TNFSF9	-0.143209	0.0768064	-0.00947407
hsa-let-7i-5p	TNFSF9	0.0391309	0.246013	0.16801
hsa-miR-16-5p	CD80	0.19323	0.222485	0.231106
hsa-miR-15b-5p	CD80	-0.0482141	0.0348954	0.0843137
hsa-miR-15a-5p	CD80	0.142749	0.126303	0.00680129
hsa-miR-26a-5p	SELP	0.0954015	0.14113	0.162311
hsa-miR-195-5p	CD80	0.00727143	-0.0211209	-0.0107971
hsa-miR-26b-5p	SELP	-0.216465	-0.0638574	-0.140782
hsa-miR-143-3p	IL2RA	-0.0280438	0.224362	0.292516
hsa-miR-505-3p	IFNG	0.0734908	0.0074324	-0.0324304
hsa-miR-497-5p	CD80	-0.0885843	-0.0420802	-0.0407084
hsa-miR-424-5p	CD80	0.198751	0.187797	0.0507259
hsa-miR-339-5p	CD276	-0.15826	0.0824161	-0.24754
hsa-miR-452-3p	TNF	0.15583	-0.0239061	-0.0335066
hsa-miR-627-5p	IFNG	-0.135867	-0.0265959	-0.00169706
hsa-miR-146b-5p	CCL5	0.126602	0.136047	-0.0572697
hsa-miR-146a-5p	CCL5	0.498006	0.535951	0.423611
hsa-let-7d-5p	TNFSF9	-0.112354	0.129351	0.158758
hsa-miR-96-5p	EDNRB	-0.203116	-0.194745	-0.144795
hsa-miR-28-3p	ICOS	0.132383	0.0511578	-0.0466046
hsa-miR-326	HAVCR2	0.0726087	0.277174	0.15541
hsa-miR-10b-3p	EDNRB	-0.0142968	0.0939056	-0.011726
hsa-miR-19b-3p	EDNRB	-0.426499	-0.0699632	-0.0433999
hsa-miR-19a-3p	EDNRB	-0.431617	-0.0288154	-0.0442985
hsa-miR-767-5p	HLA-A	-0.0480299	0.0567967	0.0888956
hsa-miR-24-3p	TNFSF9	-0.0127784	0.107238	-0.104226
hsa-miR-324-5p	CTLA4	0.193708	0.211215	0.0596078
hsa-miR-9-5p	SELP	-0.05667	-0.317482	0.0113715
hsa-miR-187-3p	CD276	0.308842	0.0209222	0.240835
hsa-miR-29b-3p	TNFRSF9	0.21514	0.216445	0.0522532
hsa-miR-514a-3p	TIGIT	-0.0522743	-0.184865	-0.0804287
hsa-miR-125a-3p	IL10	-0.184541	0.133172	-0.0334053
hsa-miR-29a-3p	TNFRSF9	0.0794656	0.188125	-0.0110466
hsa-miR-29c-3p	TNFRSF9	0.108002	0.0632912	0.0959646
hsa-miR-374a-3p	VEGFB	-0.255873	-0.192684	-0.49771
hsa-miR-576-5p	IL2RA	-0.0794713	-0.162754	-0.0447583
hsa-miR-656-3p	TLR4	-0.0612722	-0.00215222	-0.0835516
hsa-miR-185-5p	IL2RA	-0.0125455	0.203969	-0.00992275
hsa-miR-18a-3p	TNFRSF9	0.127982	-0.14172	-0.116966
hsa-miR-424-5p	PDCD1	-0.142094	0.0685715	0.165697
hsa-miR-30c-1-3p	CXCL9	-0.0896385	-0.153933	-0.137121
hsa-miR-656-3p	CTLA4	0.113046	0.0419675	0.0433929
hsa-miR-27b-5p	CXCL10	0.0607058	0.0739213	0.045698
hsa-miR-31-5p	EDNRB	-0.0727175	-0.117491	0.0248709
hsa-miR-30c-2-3p	CXCL9	-0.164533	-0.211041	-0.0409698
hsa-miR-497-5p	PDCD1	-0.11069	-0.0758171	0.172469
hsa-miR-410-3p	TNFSF9	0.150683	0.0580449	0.0886695
hsa-miR-628-5p	CD80	0.0045985	-0.182228	0.161546
hsa-miR-27a-3p	ICOS	-0.16781	0.178367	0.112845
hsa-miR-27b-3p	ICOS	-0.122204	-0.0384125	-0.0733105
hsa-miR-1271-5p	EDNRB	-0.0369315	-0.00981578	0.257912
hsa-miR-15b-5p	PDCD1	-0.107173	0.060759	-0.271231
hsa-miR-16-5p	PDCD1	0.00858337	0.216332	-0.189578
hsa-miR-339-5p	TNFRSF9	-0.148066	0.0297741	-0.0888099
hsa-let-7g-5p	IL10	0.0172592	-0.0758585	-0.0228046
hsa-miR-150-3p	IL1A	0.0627719	0.0425659	-0.166326
hsa-let-7a-5p	IL10	-0.0918739	0.0760757	-0.00767769
hsa-let-7b-5p	IL10	-0.0412215	0.0845194	0.0121213
hsa-let-7i-5p	IL10	0.0822429	0.248388	0.24076
hsa-miR-98-5p	IL10	-0.0997567	0.0268885	-0.00861624
hsa-let-7f-5p	IL10	0.00100409	0.170392	-0.0523347
hsa-let-7e-5p	IL10	-0.157017	0.119043	-0.0823498
hsa-let-7c-5p	IL10	0.00550165	-0.0176853	0.093181
hsa-miR-450b-5p	TIGIT	-0.137971	-0.183233	0.150446
hsa-miR-195-5p	PDCD1	-0.127261	-0.0906002	0.141099
hsa-miR-15a-5p	PDCD1	0.119434	0.0969745	-0.182246
hsa-miR-421	CXCL9	-0.00663096	0.032485	-0.196171
hsa-miR-34a-5p	CXCL10	0.0152762	-0.133758	-0.0132345
hsa-miR-130b-3p	TNF	0.0243163	-0.0528711	-0.070091
hsa-miR-141-3p	CD80	-0.0422636	-0.0323884	-0.0612437
hsa-miR-454-3p	TNF	0.0869185	-0.163126	-0.0434532
hsa-miR-9-3p	EDNRB	-0.0275262	-0.0642118	-0.0578291
hsa-miR-200a-3p	CD80	-0.0871575	-0.135233	-0.131534
hsa-miR-130a-3p	TNF	0.0558512	0.00691095	0.238249
hsa-miR-301a-3p	TNF	-0.00766611	-0.0555462	0.0611885
hsa-miR-30b-5p	CD80	-0.0719862	-0.136933	-0.0925117
hsa-miR-30a-5p	CD80	-0.0260386	-0.133177	0.0639979
hsa-miR-642a-5p	TLR4	0.099944	-0.0296866	-0.0283632
hsa-miR-133a-3p	HAVCR2	0.142923	0.00338539	0.326825
hsa-let-7d-5p	IL10	-0.18503	0.0402795	-0.080029
hsa-miR-30e-5p	CD80	-0.00253636	-0.161458	0.203061
hsa-miR-30c-5p	CD80	-0.186191	-0.117959	-0.0524214
hsa-miR-30d-5p	CD80	-0.0430718	-0.105852	-0.0386706
hsa-miR-509-3p	IL1A	-0.0603477	-0.111624	-0.0712211
hsa-miR-379-3p	IL1A	0.11612	-0.16348	-0.220998
hsa-miR-379-3p	CXCL10	-0.0948827	-0.0386551	0.0301869
hsa-miR-1323	TNFRSF9	-0.000693565	-0.0115011	-0.00977442
hsa-miR-301a-5p	CD80	-0.15184	0.0234946	0.00605879
hsa-miR-654-5p	TGFB1	0.265966	0.323911	0.0843529
hsa-miR-411-3p	CXCL10	-0.157393	-0.0685763	-0.0875133
hsa-miR-423-5p	PDCD1	-0.201295	-0.090789	-0.316283
hsa-miR-744-5p	TGFB1	0.0258754	-0.128025	-0.22889
hsa-miR-219a-1-3p	TLR4	-0.0750354	0.0660631	-0.187222
hsa-miR-30a-5p	IL1A	0.0226819	-0.0167295	-0.00546856
hsa-miR-423-5p	CD276	0.00685377	-0.0382618	-0.210601
hsa-miR-30c-5p	IL1A	-0.162047	0.0410591	0.181564
hsa-miR-30d-5p	IL1A	0.0549253	-0.0220248	0.0748865
hsa-miR-500b-3p	TNFRSF9	0.00830073	-0.0879612	-0.0981654
hsa-miR-655-3p	SLAMF7	0.166552	0.00459371	0.144992
hsa-miR-30e-5p	IL1A	-0.188134	-0.0715426	0.0660289
hsa-miR-153-3p	ICOS	0.0153269	0.0171509	0.0299513
hsa-miR-30b-5p	IL1A	0.025128	0.0103923	0.124152
hsa-miR-767-5p	ICOS	7.73552e-05	0.105806	-0.0351625
hsa-miR-214-3p	CD276	0.297133	0.25007	0.241142
hsa-miR-182-5p	TNFRSF9	-0.150635	0.0608426	0.00613441
hsa-miR-654-5p	CD276	0.209315	0.0882467	0.20368
hsa-miR-452-3p	VTCN1	-0.0481961	0.0287823	-0.162602
hsa-miR-34c-5p	CXCL10	-0.108586	-0.0292433	-0.057926
hsa-miR-576-5p	ARG1	0.204131	0.153177	0.105857
hsa-miR-1306-5p	TLR4	-0.164156	-0.138757	0.0933368
hsa-miR-592	TNF	-0.0472593	-0.121695	0.0976208
hsa-miR-374a-5p	IL10	-0.179663	-0.0875436	-0.0225981
hsa-miR-548f-3p	ICOS	-0.24167	-0.254051	-0.13415
hsa-miR-149-5p	IL1A	-0.0193778	0.124682	0.0277286
hsa-miR-296-5p	CXCL10	-0.167292	-0.132231	-0.246008
hsa-miR-30b-3p	TNFRSF9	-0.217415	-0.143648	-0.0730573
hsa-miR-381-3p	CXCL9	-0.0259588	0.0105444	0.0127721
hsa-miR-516b-5p	TNF	-0.0886397	0.124269	-0.0938994
hsa-miR-218-5p	ARG1	0.0298901	-0.140314	0.0846508
hsa-miR-186-5p	EDNRB	0.0955974	0.109542	-0.0275612
hsa-miR-150-5p	IL1A	0.119243	0.0457723	-0.181237
hsa-miR-149-5p	SLAMF7	-0.224564	-0.00720483	0.0811947
hsa-miR-193a-5p	VEGFB	0.074062	0.00233249	-0.0293726
hsa-miR-642a-5p	VEGFB	0.267652	0.200786	-0.0417454
hsa-miR-425-5p	TGFB1	0.0377188	-0.180399	-0.0507466
hsa-miR-93-3p	CD80	-0.204007	-0.00108983	-0.0297366
hsa-miR-18a-3p	PDCD1	0.387788	0.0235507	0.114151
hsa-miR-656-3p	IL1A	0.227604	-0.152175	-0.037538
hsa-miR-671-5p	CXCL9	0.0499876	0.0701496	0.0215458
hsa-miR-380-3p	IL10	0.0758496	-0.117362	0.0160475
hsa-miR-3614-5p	SLAMF7	0.180087	0.165552	0.102218
hsa-miR-628-5p	SLAMF7	-0.0507747	-0.200783	0.0393809
hsa-miR-548f-3p	IL1A	0.100046	-0.0892692	0.0822758
hsa-miR-224-5p	HLA-A	0.113237	0.133958	0.0646201
hsa-miR-532-5p	IL1A	-0.0245426	0.127827	0.0954803
hsa-miR-103a-3p	CD80	0.0747331	0.112287	-0.0534007
hsa-miR-758-3p	EDNRB	0.0400467	0.0538543	0.138335
hsa-miR-433-3p	CXCL9	-0.0394973	-0.111646	0.0489476
hsa-miR-487a-3p	CTLA4	0.175373	0.0793019	0.0510661
hsa-miR-154-3p	CTLA4	0.138912	0.145682	0.138631
hsa-miR-107	CD80	-0.277034	-0.233859	-0.114141
hsa-miR-369-3p	CD40LG	-0.0669017	0.0766832	0.23622
hsa-miR-452-5p	CXCL9	-0.0356198	0.105459	-0.0693304
hsa-miR-708-5p	CD276	0.319307	0.403905	0.363812
hsa-miR-411-3p	IL1A	0.245544	-0.160906	-0.108077
hsa-miR-331-3p	TNF	-0.0827789	-0.00527221	-0.0249314
hsa-miR-28-5p	CD276	-0.209058	-0.152551	-0.247657
hsa-miR-326	HLA-A	0.125	0.0596485	0.103324
hsa-miR-374b-5p	IL10	-0.0580009	-0.120657	-0.0393378
hsa-miR-216b-5p	TLR4	0.243428	0.0851466	0.184773
hsa-miR-584-5p	CCL5	-0.124286	-0.175362	0.0856558
hsa-miR-377-3p	EDNRB	-0.160748	0.00744669	0.0567033
hsa-miR-4662a-5p	TNFSF9	-0.12841	-0.227939	-0.0126371
hsa-miR-361-3p	TNF	0.0686869	-0.00418817	-0.0397261
hsa-miR-193b-3p	ICOS	-0.158329	-0.0969941	-0.209611
hsa-miR-193a-3p	ICOS	-0.168047	-0.106907	-0.103265

## Sheet: Table S7
Table S7. The enrichments of GSEA analysis in cluster1 and cluster3 in Hallmark gene sets
Description	setSize	enrichmentScore	NES	pvalue	p.adjust	qvalues	rank	leading_edge	core_enrichment
HALLMARK_FATTY_ACID_METABOLISM	157	-0.496697	-1.99779	0.0019084	0.00737898	0.00341763	3621	tags=45%, list=19%, signal=37%	60481/3422/1892/3032/2954/79602/1376/50486/2027/3157/8803/549/57515/6392/35/58476/30/10455/948/10965/8801/26275/84263/364/51170/51703/1149/760/3248/670/3033/23417/92840/54884/223/5465/84693/912/10449/2052/3295/51/34/2639/8639/1374/216/9380/4128/594/2110/51166/11185/6296/23710/2819/8608/1543/210/131/2180/3158/6999/1962/284541/1579/51179/762/33/126
HALLMARK_XENOBIOTIC_METABOLISM	199	-0.586487	-2.40676	0.00193798	0.00737898	0.00341763	2534	tags=48%, list=13%, signal=42%	1066/64087/948/6370/2184/1571/26999/3554/2729/26007/1573/3398/54677/3294/629/10611/5627/760/57406/23169/383/1593/670/65018/54884/223/5950/57447/435/2114/51128/2052/116285/51/4502/10857/5447/9060/3487/8309/866/9663/115817/2643/4128/957/1528/355/2110/217/211/51380/51181/3697/3083/2028/4153/27329/847/1562/1592/4522/5340/23710/3484/3931/6539/3479/283537/7274/1543/131/2160/2203/26998/6999/316/1036/852…
HALLMARK_ADIPOGENESIS	200	-0.420866	-1.72811	0.00194175	0.00737898	0.00341763	5084	tags=44%, list=27%, signal=33%	23786/9908/4259/29979/3417/26994/6647/1666/50/57017/2878/11343/284119/1738/5004/3459/6390/6453/8884/56922/6391/19/10162/55177/4698/64225/1384/1892/84919/10935/4189/28512/5495/79602/2632/1376/3679/718/1282/7263/35/948/2184/26275/2040/79071/10580/6239/5860/1149/5236/3419/1629/3033/92840/54884/10449/10243/9936/51/34/593/5447/5264/3977/1306/57678/217/1647/8322/51129/3991/6342/847/284/2053/54996/13414…
HALLMARK_BILE_ACID_METABOLISM	112	-0.674901	-2.59792	0.0019802	0.00737898	0.00341763	2105	tags=49%, list=11%, signal=44%	51170/51703/2638/1593/7276/23417/54884/223/9420/23461/8800/83752/9023/3295/5827/55825/5264/92960/64577/216/866/64241/23600/3283/9962/10858/3991/6342/847/6579/2053/11001/1734/4734/2180/51268/8424/6718/51302/10350/189/1581/4306/27284/10998/23460/54363/8630/10351/366/8856/27232/367/1582
HALLMARK_DNA_REPAIR	149	0.429295	1.69984	0.00200401	0.00737898	0.00341763	5847	tags=49%, list=31%, signal=34%	5888/1687/10309/11130/7298/4830/30833/10189/5424/29901/100/5984/6809/2237/10134/5437/124583/3704/29927/23649/5438/6895/5557/2987/5436/51160/1716/56655/3978/6881/11047/9978/1069/6829/8480/4832/5439/3615/4833/5440/22916/286075/5982/10946/353/6880/2067/65109/1603/7936/5111/10714/6827/8721/2068/5898/5433/9328/30834/51251/25920/10623/6118/5434/5422/2879/4059/79720/6749/4860/9533/5985/6883
HALLMARK_SPERMATOGENESIS	134	0.408432	1.59756	0.00201613	0.00737898	0.00341763	2719	tags=27%, list=14%, signal=23%	27344/11004/7137/6518/699/7272/7278/4751/2571/9133/84779/983/116832/23397/1033/7180/29106/10047/2146/6790/8277/56/83401/3948/1047/5984/9892/2947/6558/7141/4744/4291/419/27285/1080/254263
HALLMARK_UV_RESPONSE_DN	143	-0.436765	-1.72081	0.00201613	0.00737898	0.00341763	5448	tags=55%, list=28%, signal=40%	627/54468/25836/2274/6383/5607/3397/8621/3491/7410/546/2869/1859/390/11343/1739/1027/11044/4092/10000/5922/26037/23576/10240/5728/23229/8553/5159/8476/23469/4853/140609/3778/2202/23266/6591/8503/4233/5797/2534/9975/273/6256/23116/5581/323/7035/10611/10486/3949/23345/9863/10395/8455/8821/7048/4781/3815/2697/4131/7082/6334/2908/3667/3488/8997/4052/594/5737/8613/3690/29970/4493/1843/5332/7049/10516/…
HALLMARK_ALLOGRAFT_REJECTION	200	0.520299	2.14233	0.00205339	0.00737898	0.00341763	4261	tags=50%, list=22%, signal=39%	4318/822/3976/3458/915/973/924/586/6357/3561/2069/7076/4050/10563/3662/2213/926/3559/3689/6354/8767/1029/3108/4283/6688/6223/7040/3460/4830/7124/3606/972/4689/2833/6352/3109/942/6367/3117/10261/7453/3594/56253/2000/6772/6890/3383/925/6351/941/914/3112/672/3105/2268/1435/2650/3122/7186/1234/27240/6170/961/3586/6203/3553/6133/8651/5777/6356/43/2634/958/1230/3592/6347/6891/4869/3665/8664/1520/7163/3…
HALLMARK_E2F_TARGETS	200	0.643933	2.65139	0.00205339	0.00737898	0.00341763	3189	tags=48%, list=17%, signal=41%	4605/991/11004/332/5347/79019/9232/9212/898/9787/83461/24137/9319/55143/27338/57405/9133/55723/55635/146909/9837/3159/51155/10460/983/6241/7153/9833/7083/993/23594/4288/701/1033/3014/1164/3161/29089/147841/4171/4001/1062/1029/3838/4085/3925/2146/4173/4830/6790/9700/29127/1111/81624/10212/83463/4673/11113/79075/10535/5424/6628/9918/79077/4175/3070/10615/10635/3015/203068/10797/10528/994/4176/79733…
HALLMARK_INFLAMMATORY_RESPONSE	200	0.373839	1.53928	0.00205339	0.00737898	0.00341763	3380	tags=33%, list=18%, signal=27%	8877/4224/6364/3976/8685/4061/3604/5329/8744/23601/3576/2719/4973/6541/6372/2069/7130/7076/2867/5724/970/6354/8767/1441/4283/4049/3460/3696/2014/5025/3606/2769/5008/5996/27074/1536/3552/4693/6352/9966/6367/10886/136/10507/4986/5054/3383/7439/10630/1435/728/64127/3586/3553/391/7162/4323/958/6347/3659/3665/6717/4481/684/11047/2357
HALLMARK_MTORC1_SIGNALING	199	0.418669	1.72156	0.00205761	0.00737898	0.00341763	4363	tags=43%, list=23%, signal=33%	5347/3099/112399/2539/6510/440/6513/699/226/6241/586/993/23657/899/6533/1075/2023/3689/4171/2597/4173/6790/7436/10212/57761/11151/2717/10437/9521/10963/10452/7453/2936/10797/5723/26136/1649/7283/7277/7167/23753/7184/871/9415/811/9368/5352/3992/26471/81873/6509/4199/3336/27101/8894/5230/5052/30001/9136/2821/8878/5704/10987/10652/7296/908/6016/5719/10213/5033/2286/516/3308/8140/8624/7037/3329/3309/…
HALLMARK_MYC_TARGETS_V1	199	0.533425	2.19344	0.00205761	0.00737898	0.00341763	5744	tags=60%, list=30%, signal=42%	991/8318/4171/890/3838/4085/7298/4173/4830/6633/4673/6632/6193/4175/6187/6723/10155/3015/5984/6175/6141/10528/2091/4176/7203/26986/6626/1478/4174/6204/1019/6188/5902/10907/51020/51690/10856/8662/5901/22948/26121/10576/5036/3336/4869/1537/10549/8894/6627/5230/10399/5691/8761/8664/9136/7332/5245/2547/5704/10987/3066/3615/5496/57819/6194/5690/10213/790/3326/4953/10728/22916/7416/6634/3329/5688/6950/…
HALLMARK_G2M_CHECKPOINT	197	0.619008	2.53996	0.00206612	0.00737898	0.00341763	2360	tags=40%, list=12%, signal=36%	4605/991/11004/332/5347/81539/11065/9232/1058/9212/10024/1946/699/24137/1870/22974/7272/4751/27338/990/9133/3159/51155/10460/10403/983/1063/8318/9156/7153/6541/993/23594/4288/55872/1033/8438/1869/10293/3014/899/1164/3832/3161/10721/4171/890/4001/1062/3838/4085/1841/3925/3226/2146/56992/7040/1950/6790/9700/29127/1111/9055/10212/6632/51659/4175/51203/3015/6558/4082/6491/994/7371/4174/1019/3149/5933…
HALLMARK_GLYCOLYSIS	198	0.406554	1.66979	0.00206612	0.00737898	0.00341763	3181	tags=35%, list=17%, signal=29%	9514/9123/6662/10331/3099/112399/2539/5315/1058/10570/55586/10112/8497/90161/6676/55635/2026/226/10164/2719/983/4166/5214/8870/1944/638/3161/5768/2023/3925/9672/2239/6790/7436/8277/9456/7033/10007/3948/3486/1999/4282/136/9048/8614/11015/8704/7039/7264/960/26229/5834/7167/2530/10058/10616/8974/5351/375790/5352/7162/3669/54480/2288/4199/79586/1824/5230/5165
HALLMARK_ESTROGEN_RESPONSE_LATE	200	0.360148	1.4829	0.00410678	0.0136893	0.00634029	3110	tags=30%, list=16%, signal=25%	10551/2810/991/51083/4192/9536/64699/3880/7031/6280/5603/11187/10112/10538/799/990/3547/771/9022/7153/2707/58495/2171/221/7134/10761/3918/56603/4681/26353/4602/6820/1844/374/27075/10535/2717/7033/51659/51599/6491/7264/960/2261/10874/55806/10733/64065/7466/7022/9368/5777/11031/7162/3669/1345/2288/6509/29107/3613
HALLMARK_PEROXISOME	104	-0.413024	-1.57846	0.00588235	0.0172176	0.00797448	1984	tags=25%, list=10%, signal=23%	51703/412/7276/23417/54884/223/5243/8800/83752/3295/51/216/866/23705/9962/6342/847/2053/11001/2180/5244/1962/51179/7367/8856
HALLMARK_ANDROGEN_RESPONSE	99	-0.422067	-1.59746	0.00590551	0.0172176	0.00797448	2028	tags=26%, list=11%, signal=24%	6675/8821/7113/3248/6446/2982/9053/10461/22936/8611/9590/3977/220/10788/8916/9510/11057/2289/6652/563/6414/8555/9455/3638/79689
HALLMARK_MITOTIC_SPINDLE	197	0.353649	1.45112	0.00619835	0.0172176	0.00797448	1781	tags=17%, list=9%, signal=16%	11004/332/5347/9787/699/24137/22974/7272/4751/9133/10403/983/1063/7153/80119/54509/54443/3832/4001/1062/1894/393/9181/56992/6790/9700/29127/9055/29901/22994/58526/51203/7430/4082
HALLMARK_APICAL_JUNCTION	200	0.346243	1.42565	0.00821355	0.0216146	0.010011	3185	tags=26%, list=17%, signal=22%	4318/1013/4192/1364/5522/5603/3757/2318/253559/6714/51208/54509/81607/149461/3918/65266/5880/4982/6850/3691/9672/51148/9074/71/1001/942/7408/3673/3383/5818/478/2886/3265/9019/7087/80381/7283/247/8754/60/1307/6237/7781/7106/3675/57863/89/347902/5216/7791/1758/84552/8745
HALLMARK_MYC_TARGETS_V2	58	0.499871	1.70616	0.0104167	0.0260417	0.0120614	6250	tags=69%, list=33%, signal=47%	5347/3099/4173/1844/79077/6723/10528/79711/51154/4174/1019/23481/23223/10733/3177/56915/80324/6949/5036/3336/4869/9136/5245/56342/3329/4839/51491/2193/83743/79050/26354/7374/11335/10514/92856/81887/9238/705/29078/6832
HALLMARK_UNFOLDED_PROTEIN_RESPONSE	112	0.371796	1.42403	0.0140845	0.0335345	0.0155318	4890	tags=40%, list=26%, signal=30%	440/3014/54512/7534/8614/10797/10528/11015/1978/64859/55738/25804/7184/7466/56915/8815/811/55466/468/1163/6509/7280/1736/6347/4869/30001/30827/9136/6897/58477/5832/57472/8140/3309/55651/7709/11260/9570/6208/10130/51013/9797/2521/10775/6745
HALLMARK_IL6_JAK_STAT3_SIGNALING	86	0.402926	1.47706	0.0165289	0.0375657	0.0173989	3311	tags=35%, list=17%, signal=29%	5967/2919/3561/4050/10563/27242/3559/6354/1441/952/4283/578/7040/3460/64109/7124/3162/2921/3594/6772/1438/960/1435/51330/3553/8651/1230/3659/7850/5320
HALLMARK_COAGULATION	138	-0.354583	-1.38814	0.020202	0.0439174	0.0203407	2986	tags=36%, list=16%, signal=30%	5624/1369/718/5175/726/3172/2534/715/629/5627/5028/710/5327/3426/164656/7450/3075/283/7056/1803/2200/732/10411/716/9615/1638/8309/10747/2158/9104/3697/345/4153/3690/731/5340/1361/1519/7078/2157/3818/3158/2161/2160/8858/2165/462/3273

## Sheet: Table S8
Table S8. The mRNA signatures robustly associated with immune subtyes
gene	type
MMP9	Up-regulation
IL4I1	Up-regulation
PLA2G2D	Up-regulation
MMP12	Up-regulation
ZBED2	Up-regulation
EPO	Up-regulation
TNFRSF17	Up-regulation
ATP6V0D2	Up-regulation
CD177	Up-regulation
PNCK	Up-regulation
CERS1	Up-regulation
ADAMDEC1	Up-regulation
GPX2	Up-regulation
CA9	Up-regulation
PCSK1N	Up-regulation
SPP1	Up-regulation
CTSE	Up-regulation
PLK1	Up-regulation
KIF2C	Up-regulation
RAB42	Up-regulation
SLC16A3	Up-regulation
CDC20	Up-regulation
CCNB1	Up-regulation
BIRC5	Up-regulation
CEP55	Up-regulation
TMSB10	Up-regulation
PTTG1	Up-regulation
AURKB	Up-regulation
CDT1	Up-regulation
GPR84	Up-regulation
CAPG	Up-regulation
G6PD	Up-regulation
RGS20	Up-regulation
SKA1	Up-regulation
CENPM	Up-regulation
ZNF296	Up-regulation
MDK	Up-regulation
SLC1A5	Up-regulation
TREM2	Up-regulation
TNFRSF18	Up-regulation
SAPCD2	Up-regulation
SPOCD1	Up-regulation
SLC6A8	Up-regulation
TM4SF19	Up-regulation
UCHL1	Up-regulation
CCNE1	Up-regulation
GAL	Up-regulation
SLC22A8	Up-regulation
SLC38A1	Up-regulation
LGALS3BP	Up-regulation
TREM1	Up-regulation
FCGBP	Up-regulation
C15orf48	Up-regulation
RASGEF1A	Up-regulation
SFN	Up-regulation
CCR3	Up-regulation
KSR2	Up-regulation
SMIM22	Up-regulation
SOHLH2	Up-regulation
GALNT15	Down-regulation
AASS	Down-regulation
KL	Down-regulation
BTNL9	Down-regulation
SOCS2	Down-regulation
TMEM100	Down-regulation
APBA1	Down-regulation
NPY1R	Down-regulation
PTGER3	Down-regulation
ZBTB16	Down-regulation
ATOH8	Down-regulation
TAT	Down-regulation
STEAP4	Down-regulation
LDB2	Down-regulation
PDE2A	Down-regulation
ST6GALNAC3	Down-regulation
KLF9	Down-regulation
FAM107A	Down-regulation
CASQ2	Down-regulation
EDNRB	Down-regulation
RUNX1T1	Down-regulation
GPR17	Down-regulation
BOC	Down-regulation
EMCN	Down-regulation
GNA14	Down-regulation
SLC25A15	Down-regulation
CAVIN2	Down-regulation
ADRA2B	Down-regulation
GPIHBP1	Down-regulation
ASPA	Down-regulation
TEK	Down-regulation
CCDC85A	Down-regulation
CLEC3B	Down-regulation
FAT4	Down-regulation
ZNF366	Down-regulation
INSIG1	Down-regulation
SYBU	Down-regulation
FMO2	Down-regulation
BDH1	Down-regulation
DNASE1L3	Down-regulation
CPED1	Down-regulation
RANBP3L	Down-regulation
GALNT16	Down-regulation
FAM124B	Down-regulation
FBLN5	Down-regulation
CYP2C8	Down-regulation
GOLGA6A	Down-regulation
SLC1A1	Down-regulation
SPATA46	Down-regulation
PCDHGA3	Down-regulation
ZDHHC11B	Down-regulation
C7	Down-regulation
FBLN2	Down-regulation

## Sheet: Table S9
Table S9. The LncRNA signatures robustly associated with immune subtyes
LncRNA	type
AL355388.2	Up-regulation
FAM30A	Up-regulation
C10orf91	Up-regulation
PIK3CD-AS2	Up-regulation
LINC00470	Up-regulation
AL355102.4	Up-regulation
LUCAT1	Up-regulation
SMIM25	Up-regulation
AC105446.1	Up-regulation
AC061992.1	Up-regulation
AC079209.1	Up-regulation
AP003469.2	Up-regulation
AL731684.1	Up-regulation
AC004264.1	Up-regulation
LINC00668	Up-regulation
LINC00941	Up-regulation
AC083809.1	Up-regulation
PART1	Up-regulation
AC245100.6	Up-regulation
PRKAG2-AS1	Down-regulation
AC079061.1	Down-regulation
AL139385.1	Down-regulation
LINC01554	Down-regulation
AC020978.4	Down-regulation
AC004160.1	Down-regulation
AL135960.1	Down-regulation
F11-AS1	Down-regulation
AC093797.1	Down-regulation
Z99572.1	Down-regulation
LINC02499	Down-regulation
AC005920.4	Down-regulation
SOCS2-AS1	Down-regulation
NAV2-AS4	Down-regulation
LINC01354	Down-regulation
AL360181.1	Down-regulation
AC004862.1	Down-regulation
MIR100HG	Down-regulation
AC040168.1	Down-regulation
AL359915.1	Down-regulation
UPP2-IT1	Down-regulation
AC008592.4	Down-regulation
FAM99A	Down-regulation
AC092071.1	Down-regulation
TPRG1-AS1	Down-regulation

## Sheet: Table S10
Table S10. The miRNA signatures robustly associated with immune subtyes
miRNA	type
hsa-miR-146a-5p	Up-regulation
hsa-miR-155-5p	Up-regulation
hsa-miR-187-3p	Up-regulation
hsa-miR-210-3p	Up-regulation
hsa-miR-3677-3p	Up-regulation
hsa-miR-137	Up-regulation
hsa-miR-21-3p	Up-regulation
hsa-miR-625-3p	Up-regulation
hsa-miR-582-3p	Up-regulation
hsa-miR-653-5p	Up-regulation
hsa-miR-139-3p	Down-regulation
hsa-miR-139-5p	Down-regulation
hsa-let-7b-3p	Down-regulation
hsa-let-7c-3p	Down-regulation
hsa-miR-584-5p	Down-regulation
hsa-miR-125b-5p	Down-regulation
hsa-miR-4662a-5p	Down-regulation
hsa-let-7c-5p	Down-regulation
hsa-miR-99a-5p	Down-regulation
hsa-miR-1247-3p	Down-regulation
hsa-miR-99a-3p	Down-regulation
hsa-let-7a-2-3p	Down-regulation
hsa-miR-100-5p	Down-regulation
hsa-miR-152-3p	Down-regulation
hsa-miR-1247-5p	Down-regulation
hsa-miR-204-5p	Down-regulation
hsa-miR-6715a-3p	Down-regulation

[truncated: 3 more sheets: Table S11, Table S12, Table S13]
